# Supplementary material for: Transcriptome Profiling Predicts New Genes to Promote Maize Callus Formation and Transformation
Source: Front Plant Sci. 2019 Dec 20;10:1633. doi: 10.3389/fpls.2019.01633 (PMC6934073; doi:10.3389/fpls.2019.01633)
Supplement: Supplementary Table S2 — Statistics of RNA sequencing Reads of 2,4-D-treatment (D) and normal (N) maize immature embryos at different days. [file Table_2.xlsx]

## Sheet: Sheet1
Supplementary Table S2. Statistics of RNA sequencing Reads of 2,4-D-treatment (D) and normal (N) maize immature embryos at different days
Sample ID	Clean reads	Left mapped reads	Right mapped reads	Left mapped rate	Right mapped rate	Reads mapped rate
D0-1	29535706	20884168	19767437	0.707	0.669	0.688
D0-2	21765898	14904209	14124996	0.685	0.649	0.667
D0-3	27612160	19500532	18654428	0.706	0.676	0.691
D1-1	24307597	16248297	15723714	0.668	0.647	0.6575
D1-2	24571705	16805154	16189518	0.684	0.659	0.6715
D1-3	26673826	18171380	17430968	0.681	0.653	0.667
D2-1	24027239	16576733	15920027	0.69	0.663	0.6765
D2-2	24610225	16582021	15913022	0.674	0.647	0.6605
D2-3	26078813	17642362	17039474	0.677	0.653	0.665
D4-1	23382638	17107054	16156371	0.732	0.691	0.7115
D4-2	26204374	18846710	17985588	0.719	0.686	0.7025
D4-3	22792092	16337819	15577961	0.717	0.683	0.7
D6-1	22834159	16460433	15565276	0.721	0.682	0.7015
D6-2	22858391	16652470	15809414	0.729	0.692	0.7105
D6-3	22347208	16122241	15289184	0.721	0.684	0.7025
D8-1	22881842	16630225	15549311	0.727	0.68	0.7035
D8-2	22519745	16259089	15453565	0.722	0.686	0.704
D8-3	25233618	18152338	16468148	0.719	0.653	0.686
N1-1	28971337	19646654	18529142	0.678	0.64	0.659
N1-2	25526271	17108236	16079978	0.67	0.63	0.65
N1-3	28421942	19644720	18845332	0.691	0.663	0.677
N2-1	22821612	15873044	15123634	0.696	0.663	0.6795
N2-2	23594281	15578264	15036441	0.66	0.637	0.6485
N2-3	32571543	21536374	20337441	0.661	0.624	0.6425
N4-1	23705117	16622255	15651081	0.701	0.66	0.6805
N4-2	22373201	15872092	14910271	0.709	0.666	0.6875
N4-3	23464678	16301517	15494127	0.695	0.66	0.6775
N6-1	23060196	16061365	15137808	0.696	0.656	0.676
N6-2	21641496	15214864	14380411	0.703	0.664	0.6835
N6-3	22681808	15707074	14743948	0.692	0.65	0.671
N8-1	21259735	14821603	14022052	0.697	0.66	0.6785
N8-2	24380701	17272981	16281560	0.708	0.668	0.688
N8-3	22226393	15593628	14701416	0.702	0.661	0.6815
Average alignment	2.44527e+07	1.70527e+07	1.61786e+07	0.698121	0.662273	0.680197
Total alignment	806937547	562737906	533893044
