# Supplementary material for: Transcriptome Profiling Predicts New Genes to Promote Maize Callus Formation and Transformation
Source: Front Plant Sci. 2019 Dec 20;10:1633. doi: 10.3389/fpls.2019.01633 (PMC6934073; doi:10.3389/fpls.2019.01633)
Supplement: Supplementary Table S4 — Clustering results of the 7525 induced genes. [file Table_4.xlsx]

## Sheet: Sheet1
Supplementary Table S4 Clustering results of the 7525 induced genes.
		FPKM
gene	cluster	D0	D1	D2	D4	D6	D8	Symbol	Annotation
GRMZM2G154114	cluster1	0	0.251279	4.52929	4.76125	4.30528	4.27924	NA	NA
zma-MIR393c	cluster1	0	2.37012	9.32362	15.0569	6.16065	8.33209	NA	NA
GRMZM2G369481	cluster1	0	0.200539	5.95144	2.63282	2.09261	2.36326	NA	Uncharacterized protein
GRMZM2G004523	cluster1	0.551874	2.52236	4.06624	7.51528	5.35458	4.01	NA	Uncharacterized protein
GRMZM2G150859	cluster1	4.34507	17.8207	49.8982	40.9717	21.5429	15.7652	NA	NA
GRMZM2G121700	cluster1	23.8047	93.0045	144.696	217.5	85.5432	115.139	NA	Uncharacterized protein
GRMZM2G130131	cluster1	0.521362	1.89836	11.2756	9.94476	7.70904	5.47491	ofp11	NA
GRMZM2G123407	cluster1	0.249881	0.906469	2.67301	2.39346	1.09125	2.11085	NA	NA
GRMZM2G149022	cluster1	4.57327	15.7855	37.7896	25.3175	24.3556	19.1764	NA	NA
GRMZM2G031925	cluster1	2.66657	8.02656	16.8968	13.7724	8.33982	5.07681	NA	Uncharacterized protein
GRMZM2G067654	cluster1	0.792635	2.3963	5.17152	7.11535	4.1048	2.80422	bhlh10	Putative HLH DNA-binding domain superfamily protein
GRMZM2G067830	cluster1	5.12881	15.0983	10.7309	10.9782	18.9424	10.2818	NA	Putative RING zinc finger domain superfamily protein
GRMZM2G008691	cluster1	2.80944	8.31682	27.6904	24.081	25.0155	23.261	bhlh36	Putative HLH DNA-binding domain superfamily protein; Uncharacterized protein
GRMZM2G096431	cluster1	0.510674	1.45635	2.72924	2.69517	2.25978	1.15284	NA	Uncharacterized protein
GRMZM2G392918	cluster1	0.281361	0.786443	2.11264	1.42039	0.549576	0.303922	NA	Uncharacterized protein
GRMZM5G849499	cluster1	1.56839	4.1466	15.9165	16.6664	9.07913	5.14034	NA	Putative uncharacterized protein
GRMZM2G093766	cluster1	1.76339	4.66996	5.64462	5.0855	6.2311	4.89563	NA	NA
GRMZM2G043277	cluster1	2.39551	6.15989	6.62823	7.32215	6.01227	5.19001	ho2	Uncharacterized protein
GRMZM2G466743	cluster1	0.981985	2.5157	2.35258	2.70186	2.49721	2.44847	NA	Uncharacterized protein
GRMZM2G136344	cluster1	6.02683	15.1033	26.6852	20.5667	13.4037	16.3785	fha18	Uncharacterized protein
GRMZM2G431900	cluster1	3.65361	9.02952	9.71247	11.3545	11.006	10.1917	NA	Uncharacterized protein
GRMZM2G573324	cluster1	4.49617	10.8447	21.2196	24.0607	13.8867	13.8992	iaa36	IAA19-auxin-responsive Aux/IAA family member
GRMZM2G315375	cluster1	10.4487	24.9887	58.1991	44.0902	32.6863	25.0529	br2	PGP1
GRMZM2G351941	cluster1	0.65518	1.57714	1.48359	1.55931	1.40088	1.71868	NA	Uncharacterized protein
GRMZM2G040517	cluster1	273.331	650.508	2273.32	3063.79	2245.33	1550.48	NA	Pistil-specific extensin-like protein
GRMZM2G419409	cluster1	0.522014	1.21185	2.12836	2.54139	1.53427	0.814215	NA	Putative YDG/SRA domain containing protein
GRMZM2G026452	cluster1	0.648907	1.55145	1.40115	1.22078	1.25638	1.38592	NA	Uncharacterized protein
GRMZM2G053831	cluster1	4.69783	10.7951	14.2792	11.3321	10.1833	14.4989	NA	Ninja-family protein 6
GRMZM2G063882	cluster1	5.13937	11.6508	15.1521	18.4436	14.2863	14.3651	NA	AT-rich element binding factor 3; Uncharacterized protein
GRMZM2G563190	cluster1	0.579667	1.30524	1.72355	1.86765	2.17396	1.45505	NA	Uncharacterized protein
GRMZM2G043854	cluster1	0.98963	2.22274	4.07609	2.90995	1.84683	1.31394	bhlh143	Putative HLH DNA-binding domain superfamily protein
GRMZM2G084935	cluster1	2.04661	4.59702	20.4024	10.3482	10.783	11.5206	NA	Polcalcin Jun o 2
GRMZM2G113796	cluster1	4.33483	9.701	10.98	14.6402	9.82297	13.147	NA	Putative uncharacterized protein
GRMZM2G168956	cluster1	0.601134	1.3442	2.29117	3.22152	1.74487	0.874826	NA	3-ketoacyl-CoA synthase
GRMZM2G014975	cluster1	40.294	88.4352	85.6966	86.3932	84.234	80.1294	atg8e	Autophagy 8e; mRNA
GRMZM2G080828	cluster1	15.9768	34.8791	37.5381	37.7691	36.7282	41.8646	NA	Uncharacterized protein
GRMZM2G116376	cluster1	1.53505	3.33074	2.00046	2.90762	2.82961	1.9105	NA	Uncharacterized protein
GRMZM2G035809	cluster1	5.8897	12.8643	16.7358	15.3835	11.7947	10.5409	snrkII1	Putative snRK/SAPK family protein kinase isoform 1; Putative snRK/SAPK family protein kinase isoform 2; Uncharacterized protein
GRMZM2G062777	cluster1	1.05014	2.17887	2.83135	2.21438	1.98419	2.62403	NA	Putative uncharacterized protein
GRMZM2G320799	cluster1	1.98919	4.27302	3.4084	3.72231	3.24808	3.66065	NA	Uncharacterized protein
GRMZM2G111731	cluster1	3.7066	7.92229	10.3967	8.09086	8.7912	6.6968	myb44	MYB transcription factor; Uncharacterized protein
GRMZM2G149739	cluster1	2.37363	5.01524	4.55212	4.66636	3.5992	3.28345	NA	Uncharacterized protein
GRMZM2G055585	cluster1	5.19399	10.9866	33.2897	26.766	18.8875	14.3762	NA	Uncharacterized protein
GRMZM2G154149	cluster1	9.30991	19.514	38.1085	40.2438	27.814	24.669	NA	Putative phototropic-resoponsive NPH3 family protein isoform 1; Putative phototropic-resoponsive NPH3 family protein isoform 2; Putative phototropic-resoponsive NPH3 family protein isoform 3; Uncharacterized protein
GRMZM2G093323	cluster1	2.99144	6.33402	5.98342	6.08177	6.45526	5.27626	NA	Protein brittle-1; Uncharacterized protein
GRMZM2G091258	cluster1	9.48183	19.7965	30.2743	17.228	16.8528	18.3748	NA	Uncharacterized protein
GRMZM2G028046	cluster1	0.652057	1.31963	1.22211	1.20432	0.748674	1.19221	NA	Nucleic acid binding protein; Uncharacterized protein
GRMZM2G107120	cluster1	0.611928	1.30214	1.42904	1.29186	1.41331	1.3017	NA	NA
GRMZM2G114702	cluster1	11.2958	23.3179	27.2369	22.149	18.1008	18.6514	NA	Uncharacterized protein
GRMZM2G158141	cluster1	1.07583	2.22322	4.72817	6.3613	4.98257	4.69652	NA	Uncharacterized protein
GRMZM2G067853	cluster1	4.62614	9.55416	17.8949	16.5887	14.2249	13.3188	NA	Uncharacterized protein
GRMZM2G135629	cluster1	0.665977	1.3673	1.20955	1.18971	0.941762	1.10373	NA	Uncharacterized protein
GRMZM2G154093	cluster1	10.0858	20.8423	21.1728	29.9539	23.2442	23.3069	NA	Uncharacterized protein
GRMZM2G395950	cluster1	3.71113	7.68152	6.79792	7.42388	9.06237	5.75801	NA	Putative uncharacterized protein
GRMZM2G029519	cluster1	5.25773	10.775	13.8632	14.2015	6.0258	16.0552	NA	Uncharacterized protein
GRMZM2G002959	cluster1	19.0093	38.8067	27.1491	33.0538	33.0429	31.2419	pza00473	Glutaryl-CoA dehydrogenase isoform 1; Glutaryl-CoA dehydrogenase isoform 2; Uncharacterized protein
GRMZM2G137077	cluster1	3.55257	7.19464	11.1158	8.81299	6.90228	7.68599	NA	Polygalacturonase
GRMZM2G158437	cluster1	1.30227	2.65096	2.48002	2.50049	2.349	2.50473	NA	Uncharacterized protein
GRMZM2G030097	cluster1	2.36583	4.82968	4.97326	4.62644	4.91145	4.56263	NA	Cat eye syndrome critical region protein 5; Uncharacterized protein
GRMZM2G163717	cluster1	1.51744	3.07442	3.53151	3.26476	2.6731	3.2409	NA	Uncharacterized protein
GRMZM2G030173	cluster1	20.9083	42.3116	37.7683	44.4854	41.1395	30.7365	NA	Xyloglucan endotransglucosylase/hydrolase protein 5
GRMZM2G106204	cluster1	0.643875	1.30173	2.77919	2.67568	0.858056	0.391959	yab3	Protein YABBY
GRMZM2G389285	cluster1	0.542337	1.08302	3.04035	4.23669	3.53049	2.3206	NA	PUP1
GRMZM2G048294	cluster1	4.42923	8.91282	22.9515	22.6935	23.7657	20.6953	bri1a	Putative leucine-rich repeat receptor-like protein kinase family protein
GRMZM2G024799	cluster1	1.44228	0.656946	4.83561	4.83282	4.71319	1.90451	NA	SF16 protein
GRMZM2G133978	cluster1	1.36949	0.575381	2.86852	2.10934	2.53316	0.809703	NA	Rapid ALkalinization Factor family protein
GRMZM2G008501	cluster1	3.46578	4.2807	6.96524	5.83021	4.38234	4.37572	NA	Uncharacterized protein
GRMZM2G115453	cluster1	3.54773	5.79087	7.14998	6.79549	6.66211	6.66825	NA	Uncharacterized protein
GRMZM2G434301	cluster1	3.46167	5.01954	6.98509	4.94631	6.59339	7.36792	NA	Uncharacterized protein
GRMZM2G066469	cluster1	5.13861	5.03483	10.2792	9.68961	9.2006	9.7556	NA	Inner membrane protease subunit 1
GRMZM2G168166	cluster1	23.8948	35.9779	47.9233	33.0103	32.1958	33.9297	NA	Uncharacterized protein
GRMZM2G031370	cluster1	1.02719	1.56535	2.06815	1.69461	1.4401	1.59413	NA	Uncharacterized protein
GRMZM2G059106	cluster1	7.93331	14.3412	15.95	11.8986	11.9735	12.3121	NA	Golgi SNAP receptor complex member 1
GRMZM2G028905	cluster1	6.80073	6.80418	13.6454	11.1978	10.134	9.15698	NA	Uncharacterized protein
GRMZM2G079013	cluster1	10.1589	16.834	20.5226	21.96	20.6097	20.6626	lug2	LUG transcription factor
GRMZM2G081919	cluster1	3.14612	5.37875	6.40029	5.31181	5.42831	6.2098	myb15	Myb-like DNA-binding domain containing protein; Uncharacterized protein
GRMZM2G026043	cluster1	5.7067	8.61643	11.583	11.4602	11.0935	11.9266	NA	Uncharacterized protein
GRMZM2G344630	cluster1	2.42376	2.87408	4.91592	3.97444	4.84974	3.08862	NA	GTP binding protein
AC234154.1_FG007	cluster1	14.6214	26.5939	29.7939	23.3824	27.2512	26.6301	NA	NA
GRMZM2G048561	cluster1	5.21617	8.99657	10.6639	9.47588	9.53333	9.40668	NA	Uncharacterized protein
GRMZM2G069422	cluster1	6.3244	9.73352	13.0497	9.90095	8.86553	8.16812	NA	Uncharacterized protein
GRMZM2G416684	cluster1	4.82291	8.57681	9.8748	8.97735	8.38757	9.50164	NA	NA
GRMZM2G018417	cluster1	12.0092	19.5731	24.6462	21.2043	22.1124	23.7484	ommp1	Uncharacterized protein
GRMZM2G058910	cluster1	11.7119	22.6148	24.0284	23.083	19.7358	22.612	NA	Putative uncharacterized protein
GRMZM2G089976	cluster1	16.9737	23.9486	35.0479	34.5046	32.0104	30.7655	NA	Uncharacterized protein
GRMZM2G031400	cluster1	8.88777	11.5716	18.2479	15.506	19.1253	14.5264	NA	NA
GRMZM2G084928	cluster1	4.68463	6.36296	9.66062	7.15422	8.08398	8.11021	NA	Uncharacterized protein
GRMZM2G151195	cluster1	5.98361	11.029	12.3537	12.6616	11.5319	12.6472	NA	NA
GRMZM2G044044	cluster1	5.40942	9.0473	11.1885	10.368	10.618	12.008	NA	Uncharacterized protein
GRMZM2G180967	cluster1	16.3561	22.1459	34.0133	22.3936	25.4793	28.0434	NA	Uncharacterized protein
GRMZM2G369340	cluster1	8.7187	16.3672	18.1186	16.3087	17.6439	20.9854	NA	Uncharacterized protein
GRMZM2G362949	cluster1	0.447752	0.730005	0.942521	1.01006	0.664247	0.693952	NA	Uncharacterized protein
GRMZM2G129615	cluster1	4.91798	9.40473	10.3065	8.48135	7.73132	8.16582	NA	CRS2-associated factor 1; Uncharacterized protein
GRMZM2G143878	cluster1	4.24714	7.225	8.87474	8.17758	8.71515	9.03985	NA	Uncharacterized protein
GRMZM2G031620	cluster1	8.61957	9.86404	18.0262	9.67083	11.2916	12.9005	NA	Uncharacterized protein
GRMZM2G305167	cluster1	3.62307	5.62882	7.57452	7.76	6.54308	7.51621	NA	Uncharacterized protein
GRMZM2G465833	cluster1	19.2861	31.2128	40.3273	28.0223	31.68	31.7122	NA	Putative ACT-domain containing protein kinase family protein; Uncharacterized protein
GRMZM2G128744	cluster1	10.0951	16.3551	21.2361	14.3637	14.2744	15.1134	NA	Uncharacterized protein
GRMZM2G102347	cluster1	10.8768	14.1828	22.8013	18.3105	14.36	16.3597	pzb01662	Uncharacterized protein
AC198169.4_FG004	cluster1	15.6375	21.6908	32.8954	28.4279	32.5891	34.3541	NA	EMB1586; Uncharacterized protein
GRMZM2G001652	cluster1	6.14222	9.51716	12.9428	11.6812	10.7	11.5276	NA	NA
GRMZM2G097275	cluster1	0.839121	1.35337	1.75352	1.6535	1.53192	1.52339	sbp27	Uncharacterized protein
GRMZM2G103465	cluster1	2.22914	3.94174	4.75077	3.92739	4.2373	3.99264	NA	DHHC zinc finger domain containing protein
GRMZM2G110851	cluster1	2.67901	3.89886	5.71765	5.18612	3.93809	4.17092	dek2	NA
AC148167.6_FG001	cluster1	21.5139	30.0496	46.0646	33.2732	30.5825	29.0449	NA	Uncharacterized protein
GRMZM2G113163	cluster1	3.44285	4.29383	7.37521	6.0743	5.65414	5.92353	NA	Uncharacterized protein
GRMZM2G481755	cluster1	15.0301	24.057	32.1616	29.5532	30.3737	29.6063	NA	NA
GRMZM2G330302	cluster1	5.73368	14.812	12.3094	16.4319	8.93376	5.97354	umi8	Putative CTP synthase
GRMZM2G020721	cluster1	8.45163	12.3729	18.0839	17.16	18.0466	17.203	NA	Uncharacterized protein
GRMZM2G113506	cluster1	5.06078	9.10885	10.9099	10.5131	8.50378	9.80864	NA	Uncharacterized protein
GRMZM2G155337	cluster1	6.31576	10.305	13.6168	13.8904	13.389	13.5665	NA	Uncharacterized protein
GRMZM2G103900	cluster1	5.16049	9.08327	11.1332	8.32431	8.47929	9.4252	NA	Uncharacterized protein
GRMZM2G142962	cluster1	1.31459	1.72671	2.86825	2.1946	1.86961	1.88342	hb129	NA
GRMZM2G001265	cluster1	12.5117	19.9211	27.018	18.2704	18.4298	18.1805	NA	Palmitoyltransferase ZDHHC20; mRNA
GRMZM2G144002	cluster1	10.3146	9.72393	22.2998	22.2185	18.4271	21.5861	agpll2	Glucose-1-phosphate adenylyltransferase
AC205419.3_FG001	cluster1	20.7646	23.6284	44.9367	32.4713	30.8434	30.7443	NA	Putative DUF869 domain containing family protein
AC203535.4_FG004	cluster1	1.30176	1.42908	2.87554	3.53494	0.908325	2.36097	NA	Rieske domain containing protein
GRMZM2G049510	cluster1	0.508113	0.912306	1.12298	1.0624	1.00677	1.02314	NA	NA
GRMZM2G030165	cluster1	6.71291	10.7214	14.5561	11.502	11.2268	9.6047	NA	Uncharacterized protein
GRMZM2G074436	cluster1	20.0461	25.4498	43.6141	25.4386	30.9932	36.3741	NA	Uncharacterized protein
GRMZM2G146192	cluster1	3.51548	3.63686	7.63503	6.17245	4.5588	5.72277	NA	Auxin-induced beta-glucosidase; Putative O-Glycosyl hydrolase superfamily protein
GRMZM2G048435	cluster1	5.28881	9.47996	11.5891	10.0549	10.6041	10.0245	NA	Uncharacterized protein
GRMZM2G129218	cluster1	8.46868	15.3133	18.428	12.6583	14.4218	18.2801	NA	Uncharacterized protein
GRMZM2G107116	cluster1	8.64634	20.346	18.892	17.1988	16.1028	15.9052	NA	Uncharacterized protein
GRMZM2G416632	cluster1	54.8961	203.241	119.857	186.351	143.692	136.873	gst23	Glutathione transferase GST 23
GRMZM2G147123	cluster1	0.757809	0.995493	1.62322	1.84786	1.42928	1.80089	NA	Uncharacterized protein
GRMZM2G054032	cluster1	2.17109	3.99718	4.73594	4.39818	4.42359	4.3061	NA	F-box protein
GRMZM2G056920	cluster1	2.32499	3.86323	5.11309	4.42868	4.97907	4.28448	c3h38	Uncharacterized protein
GRMZM2G016827	cluster1	35.9739	65.1922	78.8388	70.7673	76.6686	90.8927	NA	Uncharacterized protein
GRMZM2G098442	cluster1	0.703848	0.872585	1.58071	1.18672	1.29209	1.34481	dbb12	Salt tolerance-like protein
GRMZM2G031572	cluster1	19.0835	29.1089	41.9155	29.6235	27.9779	32.2312	NA	Prolyl carboxypeptidase like protein
GRMZM2G096343	cluster1	12.9919	24.2107	28.5174	24.158	24.3535	26.4016	NA	Uncharacterized protein
GRMZM2G009464	cluster1	66.9945	107.204	147.287	106.946	107.635	111.757	NA	Uncharacterized protein
GRMZM2G048912	cluster1	0.967425	1.68738	2.12939	2.38802	2.20389	2.26337	NA	NA
GRMZM2G078238	cluster1	4.42078	7.50252	9.76866	7.46636	7.3344	7.15428	NA	Uncharacterized protein
GRMZM2G146847	cluster1	27.3679	29.5233	60.1933	51.6197	38.0385	47.4116	NA	Uncharacterized protein
GRMZM2G071172	cluster1	3.4166	5.01661	7.52093	4.76024	4.84107	4.92223	NA	NA
GRMZM2G050845	cluster1	3.25345	5.81602	7.24021	6.00385	5.97643	6.13967	NA	NA
GRMZM2G172726	cluster1	11.2674	17.9168	24.9348	19.824	22.544	23.958	NA	Uncharacterized protein
GRMZM2G103116	cluster1	13.1147	10.6364	29.151	20.5905	19.2215	11.2797	NA	Microtubule motor
GRMZM2G054380	cluster1	3.49344	6.85812	7.81407	9.61535	7.70422	5.53149	pza00838	Putative histone-lysine N-methyltransferase family protein isoform 1; Putative histone-lysine N-methyltransferase family protein isoform 2; Putative histone-lysine N-methyltransferase family protein isoform 3; Uncharacterized protein
AY530952.1_FG001	cluster1	4.39003	4.43048	9.79462	11.3183	9.99228	8.78359	NA	Uncharacterized protein
GRMZM2G107205	cluster1	8.1309	13.2111	18.1778	11.8446	11.6377	16.7814	NA	Uncharacterized protein
GRMZM2G704032	cluster1	7.05378	11.3452	15.8242	10.8734	10.7928	10.5616	NA	Protein binding protein
GRMZM5G832772	cluster1	3.10494	4.26799	7.00544	5.98779	5.71372	6.50451	mrpa2	Multidrug resistance associated protein 2
GRMZM2G058900	cluster1	3.65142	6.25916	8.25651	7.50428	8.22243	8.579	NA	Uncharacterized protein
GRMZM5G826577	cluster1	5.51389	7.54483	12.6739	7.97103	7.96809	11.5906	NA	Uncharacterized protein
GRMZM2G100229	cluster1	19.5558	22.9954	44.3966	25.9433	25.6264	24.784	NA	Calmodulin binding protein; Uncharacterized protein
GRMZM5G813804	cluster1	28.3607	20.4904	64.3777	46.0927	39.2465	37.3627	NA	Uncharacterized protein
GRMZM2G173309	cluster1	10.3746	15.2288	23.5766	18.6364	17.939	17.0226	NA	Uncharacterized protein
GRMZM2G703307	cluster1	4.2824	9.23478	9.78656	7.87156	7.60355	9.02931	NA	Putative uncharacterized protein
GRMZM2G047705	cluster1	4.41901	6.55562	9.99163	8.47098	7.93152	9.09435	NA	Uncharacterized protein
GRMZM5G832740	cluster1	22.5221	31.3846	51.3282	39.4042	39.5667	29.3644	NA	Protein yippee-like
GRMZM2G047376	cluster1	5.1811	11.7745	11.7631	12.4691	11.8341	11.2756	NA	Uncharacterized protein
GRMZM2G000231	cluster1	5.84497	11.6643	13.3662	10.7551	10.6466	10.5648	NA	Uncharacterized protein
GRMZM5G866910	cluster1	2.19544	3.08638	5.01567	4.02047	3.55882	3.08971	NA	Uncharacterized protein
GRMZM2G140587	cluster1	3.74537	7.32381	8.56583	7.62599	7.63798	8.2356	NA	Putative nucleoside phosphatase GDA1/CD39 family protein
GRMZM2G356034	cluster1	7.3952	8.11522	16.9452	9.69375	9.4437	8.42161	NA	Uncharacterized protein
GRMZM2G171912	cluster1	24.0347	34.913	55.2401	60.6334	42.9816	65.1715	bzip122	Putative bZIP transcription factor superfamily protein
GRMZM2G094050	cluster1	22.8316	40.4209	52.4984	32.8983	34.299	41.5393	NA	Sarcoplasmic reticulum histidine-rich calcium-binding protein isoform 1; Sarcoplasmic reticulum histidine-rich calcium-binding protein isoform 2; Uncharacterized protein
GRMZM2G162409	cluster1	5.69277	9.36364	13.0896	11.1196	12.6711	12.6902	glk15	Uncharacterized protein
GRMZM2G340933	cluster1	5.8898	8.30106	13.5218	10.1672	9.8978	9.12355	NA	NA
GRMZM2G430680	cluster1	13.3641	23.7768	30.8532	34.5324	32.3678	31.9923	NA	Putative glycosyl transferase family protein
GRMZM2G026065	cluster1	11.8176	15.0096	27.3283	25.4772	17.9012	19.5799	NA	Uncharacterized protein
GRMZM2G051174	cluster1	7.52308	13.6214	17.4981	12.4116	13.1025	13.5924	NA	Uncharacterized protein
GRMZM2G046262	cluster1	3.68553	1.0971	8.63669	5.59822	2.87869	2.96836	NA	Uncharacterized protein
GRMZM2G163658	cluster1	6.85954	10.339	16.0762	13.7498	13.512	12.8619	NA	Uncharacterized protein
GRMZM2G306357	cluster1	2.20059	4.21432	5.17396	5.6099	5.27182	5.68083	c3h2	C3H-type transcription factor
GRMZM2G095141	cluster1	5.76181	10.9269	13.4572	10.3878	13.316	14.9488	NA	Hydroxymethylglutaryl-CoA lyase isoform 1; Hydroxymethylglutaryl-CoA lyase isoform 2; Uncharacterized protein
GRMZM2G164308	cluster1	1.01777	0.598411	2.35466	1.78948	1.65397	1.31761	NA	ABA-induced protein; ABA-induced protein isoform 1; ABA-induced protein isoform 2
GRMZM2G149422	cluster1	63.9103	111.954	149.739	100.317	96.4679	140.084	NA	Uncharacterized protein
GRMZM2G150319	cluster1	32.0279	47.7294	75.0716	101.99	74.5338	78.1766	NA	Uncharacterized protein
GRMZM2G151496	cluster1	13.8806	26.2754	32.5662	40.812	26.9365	18.5837	NA	Uncharacterized protein
GRMZM2G301098	cluster1	2.14708	3.78338	5.03487	3.83374	3.70249	3.73982	mbd119	NA
GRMZM2G067789	cluster1	16.7371	39.9111	39.5117	30.108	29.1443	32.8447	NA	NA
GRMZM2G099036	cluster1	3.01888	6.75669	7.14824	9.98026	6.23018	7.17851	NA	Uncharacterized protein
GRMZM2G159016	cluster1	6.08794	9.36003	14.3836	13.5347	12.5247	13.239	NA	Uncharacterized protein
GRMZM2G104294	cluster1	26.9188	42.8803	63.8214	60.3881	58.0296	58.9603	NA	NADPH--cytochrome P450 reductase
GRMZM2G092959	cluster1	18.5591	33.2136	44.0292	33.4644	35.9248	36.5028	NA	Uncharacterized protein
GRMZM2G420684	cluster1	2.97506	4.18635	7.03166	5.64544	4.87604	4.76526	NA	Uncharacterized protein
GRMZM2G134027	cluster1	9.21039	16.2503	22.0253	19.8931	19.7368	23.8352	NA	Armadillo/beta-catenin-like repeat family protein
GRMZM2G077356	cluster1	65.1323	105.7	155.554	134.389	113.555	77.6222	iaa21	Uncharacterized protein
GRMZM2G077769	cluster1	29.3046	40.0312	70.2348	62.9996	54.2409	58.9482	NA	Uncharacterized protein
GRMZM2G145816	cluster1	7.05558	8.06499	16.899	12.8681	12.6103	14.2726	NA	Uncharacterized protein
GRMZM2G136412	cluster1	1.78418	3.08354	4.26984	3.19285	2.86726	4.19558	NA	Uncharacterized protein
AC217358.3_FG011	cluster1	24.0528	32.8594	57.8966	45.759	50.7187	57.5985	NA	Uncharacterized protein
GRMZM2G175504	cluster1	3.46469	4.16735	8.34048	7.75245	8.09391	6.85259	NA	NA
GRMZM2G139565	cluster1	12.8612	11.8696	30.9915	29.6422	29.1201	27.4389	NA	Uncharacterized protein
GRMZM2G155357	cluster1	15.9479	26.0978	38.4199	29.7052	35.4796	38.3745	NA	Uncharacterized protein
AC208897.3_FG003	cluster1	1.4552	2.81477	3.54785	2.79616	2.45539	2.23007	NA	Uncharacterized protein
GRMZM2G176289	cluster1	0.910303	0.876961	2.20267	2.19447	1.3434	0.93547	bhlh11	Putative HLH DNA-binding domain superfamily protein; Uncharacterized protein
GRMZM2G090693	cluster1	1.75237	1.85424	4.28321	6.26835	4.22078	4.02178	NA	NA
GRMZM2G056996	cluster1	1.3139	2.60316	3.19799	2.37523	2.32331	2.71743	NA	NA
GRMZM2G156356	cluster1	6.9413	7.67795	16.9095	17.3787	16.4233	11.144	NA	Maltose excess protein 1-like
GRMZM2G077415	cluster1	63.1743	152.942	154.156	130.893	128.71	126.911	NA	NA
GRMZM2G154578	cluster1	153.941	123.526	375.664	258.254	244.719	208.868	NA	Uncharacterized protein
GRMZM2G169699	cluster1	2.87484	5.49989	7.00583	5.86187	3.54719	5.88817	NA	Uncharacterized protein
GRMZM2G096480	cluster1	3.22021	5.40001	7.90835	5.00555	4.90562	6.63736	NA	Uncharacterized protein
GRMZM2G102059	cluster1	1.34726	2.35394	3.27181	2.66319	2.58943	3.72356	abi12	NA
GRMZM2G076276	cluster1	6.47191	9.35017	15.8703	11.1836	9.45453	9.47688	NA	Uncharacterized protein
GRMZM2G440537	cluster1	0.374056	0.658137	0.935301	0.883295	0.804264	0.898069	NA	NA
GRMZM2G099745	cluster1	34.5227	89.2299	84.8098	62.8329	67.8816	80.3723	NA	Nitrate-induced NOI protein; Uncharacterized protein
GRMZM2G005886	cluster1	1.45526	3.38625	3.55535	3.74295	1.4244	4.25531	NA	Uncharacterized protein
GRMZM2G175661	cluster1	5.87932	11.4344	14.6546	10.7766	9.85745	9.92687	NA	Putative zinc finger protein
AC207628.4_FG011	cluster1	7.73102	8.23045	19.3406	14.1056	13.1226	11.9171	NA	Uncharacterized protein
GRMZM2G136859	cluster1	4.42726	6.86986	11.0966	7.58957	10.2652	7.51522	hma1	Metal ion binding protein
GRMZM2G465383	cluster1	6.96388	6.49225	17.4944	13.9998	6.35846	6.53526	NA	SAUR25-auxin-responsive SAUR family member
GRMZM2G483889	cluster1	0.556175	0.6959	1.42956	1.26092	1.07497	1.0195	NA	NA
GRMZM5G855337	cluster1	12.1936	13.6148	31.0073	23.6129	17.0301	14.6976	NA	Uncharacterized protein
GRMZM2G345840	cluster1	9.12646	21.3065	23.1413	17.5855	20.8413	23.4953	NA	Uncharacterized protein
GRMZM2G050684	cluster1	5.39074	10.5155	13.7143	10.4103	9.26338	13.1339	NA	CBS domain containing protein
GRMZM2G055809	cluster1	4.93598	7.31205	12.5006	8.01309	8.70214	7.05674	NA	Uncharacterized protein
GRMZM2G177923	cluster1	6.46027	13.8744	16.4706	20.6981	16.972	16.3357	NA	Uncharacterized protein
GRMZM2G435445	cluster1	11.4042	21.5444	29.056	22.8664	26.2935	32.8259	tubtf5	Uncharacterized protein
GRMZM2G041770	cluster1	1.88177	3.04624	4.81424	3.78094	3.82851	3.83958	NA	NA
GRMZM2G047777	cluster1	4.05673	6.08061	10.3056	5.63955	6.09258	6.61816	NA	F-box domain containing protein; Uncharacterized protein
GRMZM2G097987	cluster1	4.95818	10.6748	12.5616	8.62934	10.4642	11.2501	NA	Putative nucleoside phosphatase GDA1/CD39 family protein
GRMZM2G160463	cluster1	15.317	23.5616	39.0525	32.9765	24.066	35.6741	NA	Uncharacterized protein
GRMZM2G459820	cluster1	1.80684	2.26851	4.61051	4.55507	4.23139	3.12366	NA	NA
GRMZM2G108668	cluster1	1.96548	2.57379	5.00927	3.80134	5.10847	4.90577	NA	Uncharacterized protein
GRMZM2G102560	cluster1	12.1228	20.1143	30.899	32.8795	29.3499	28.9879	NA	Uncharacterized protein
GRMZM2G039857	cluster1	5.07863	8.06943	12.9412	8.06023	7.59685	8.74708	NA	Uncharacterized protein
GRMZM2G075117	cluster1	22.2967	41.7616	57.168	57.3958	56.3812	48.0524	cyc13	Uncharacterized protein
GRMZM2G117465	cluster1	1.56776	2.14152	4.02821	4.7844	3.32975	3.68267	NA	Uncharacterized protein
GRMZM2G177894	cluster1	0.75404	1.52056	1.93342	2.2753	1.71188	1.89811	NA	NA
GRMZM2G089231	cluster1	13.683	20.4462	35.1746	35.8116	28.0098	29.1852	NA	Uncharacterized protein
AC235541.1_FG002	cluster1	7.89838	13.0098	20.3138	16.6253	16.2492	17.5016	NA	Uncharacterized protein
GRMZM2G036916	cluster1	6.08284	11.4459	15.7458	15.5041	13.724	13.8536	NA	Uncharacterized protein
GRMZM2G097995	cluster1	3.05167	4.25008	7.89022	6.39033	8.23188	7.37792	NA	Uncharacterized protein
GRMZM2G177412	cluster1	2.39429	4.06005	6.25041	7.98934	6.03121	6.85763	gtr1	Glutamyl-tRNA reductase
GRMZM2G344857	cluster1	1.0332	1.08474	2.72763	2.62114	2.59175	2.04142	NA	NA
GRMZM2G419305	cluster1	11.6839	23.4531	30.9006	22.6376	22.792	24.6756	NA	Uncharacterized protein
GRMZM2G049070	cluster1	10.6005	16.8913	28.0038	25.9216	16.0382	16.3912	NA	NA
GRMZM2G176141	cluster1	8.53819	11.5997	22.634	18.6267	17.9757	22.2648	bhlh138	Uncharacterized protein
GRMZM2G052880	cluster1	8.49559	18.5821	22.5717	20.9802	23.0547	25.3761	NA	Uncharacterized protein
GRMZM2G114276	cluster1	16.8459	21.5024	45.047	47.1928	33.8551	22.2405	NA	NA
GRMZM2G094639	cluster1	115.98	234.349	311.774	190.951	259.738	337.462	NA	NA
GRMZM2G329177	cluster1	4.66903	7.56347	12.6601	10.6522	10.4141	9.76604	NA	NA
GRMZM2G389155	cluster1	0.457035	0.295248	1.25466	0.597039	0.0579098	0.929835	NA	NA
GRMZM2G124313	cluster1	14.3121	20.6459	38.7636	33.9628	26.7516	26.3589	NA	CDP-diacylglycerol--glycerol-3-phosphate 3-phosphatidyltransferase
AC213654.3_FG001	cluster1	22.745	32.3735	61.8913	57.4987	38.3664	69.7127	NA	Uncharacterized protein
GRMZM2G123973	cluster1	2.96288	3.7503	8.10521	6.21845	3.98323	4.03676	NA	Uncharacterized protein
GRMZM2G101350	cluster1	1.24501	1.40799	3.41387	4.74198	2.73697	1.84242	bhlh29	Uncharacterized protein
GRMZM2G358238	cluster1	6.39977	9.04838	17.518	15.3372	14.0904	14.5243	NA	Uncharacterized protein
GRMZM2G055273	cluster1	6.94651	10.5992	19.018	12.9192	17.6315	13.7352	NA	CASP-like protein 10
GRMZM2G065073	cluster1	14.7009	23.1597	40.6666	27.3524	30.8838	32.4473	NA	Gamma-glutamyltranspeptidase 1
GRMZM2G081380	cluster1	5.133	12.6366	14.2375	14.0944	10.6897	8.48959	NA	Uncharacterized protein
GRMZM2G104199	cluster1	13.2819	19.0282	37.5263	20.246	24.4387	34.4279	NA	Uncharacterized protein
GRMZM2G159720	cluster1	8.04213	13.8372	22.6474	13.4209	12.5583	12.6925	NA	Uncharacterized protein
GRMZM2G158281	cluster1	4.6337	7.69354	13.1387	10.9656	11.5405	12.8336	NA	Putative HLH DNA-binding domain superfamily protein
GRMZM2G149520	cluster1	30.9269	50.1941	87.7293	64.6366	64.0512	64.954	NA	Uncharacterized protein
GRMZM2G046024	cluster1	5.88662	6.08916	16.8119	21.1153	12.9121	10.4624	NA	ATPase; coupled to transmembrane movement of substance; ATPase; coupled to transmembrane movement of substances
GRMZM2G406674	cluster1	13.6188	14.6524	38.9543	35.7436	33.1947	30.0138	NA	Calmodulin binding protein isoform 1; Calmodulin binding protein isoform 2
GRMZM2G041127	cluster1	5.89585	9.76295	16.9133	18.2875	25.5916	10.094	hb54	Uncharacterized protein
GRMZM2G153977	cluster1	33.5344	38.523	96.4581	53.1898	57.6991	56.1175	NA	Uncharacterized protein
GRMZM2G073197	cluster1	26.786	26.5134	77.6283	62.7077	61.3988	49.4128	NA	Putative uncharacterized protein
GRMZM2G024005	cluster1	8.8427	10.2155	25.7529	20.3404	17.6344	20.4387	NA	Uncharacterized protein
GRMZM2G079883	cluster1	6.0989	8.61587	17.9641	13.9656	18.3669	15.0259	NA	Pistil-specific extensin-like protein
GRMZM2G146313	cluster1	1.04917	1.64911	3.12509	3.43725	3.04264	3.23252	NA	Uncharacterized protein
GRMZM2G090487	cluster1	0.640036	1.43359	1.90608	1.632	1.53312	0.866877	NA	Uncharacterized protein
GRMZM2G015324	cluster1	6.28176	13.2026	18.6903	13.5319	15.6443	16.2705	cbl9	Calcineurin B-like protein 9
GRMZM2G155375	cluster1	5.08374	11.2676	15.0379	12.4885	13.2862	14.9662	NA	Uncharacterized protein
GRMZM2G067373	cluster1	5.7391	15.2389	17.1159	16.4995	16.763	14.6618	NA	Uncharacterized protein
GRMZM2G419994	cluster1	11.8536	39.2761	35.4984	25.6093	29.439	32.4067	NA	Wound induced protein
GRMZM2G040968	cluster1	12.2733	14.863	36.963	29.7674	28.9361	26.4231	NA	Uncharacterized protein
GRMZM2G049342	cluster1	11.3645	19.9954	34.5171	23.398	22.346	19.9408	NA	Uncharacterized protein
GRMZM2G309655	cluster1	0.788665	0.962632	2.4048	2.7246	1.36952	1.69345	NA	Uncharacterized protein
GRMZM2G081790	cluster1	0.319553	0.304595	0.97399	0.846266	0.582371	0.289937	NA	NA
GRMZM2G081214	cluster1	8.61809	16.8456	26.2333	12.2441	19.1602	14.1506	NA	NA
GRMZM2G045686	cluster1	2.83494	4.03762	8.592	4.96585	5.00568	4.7105	NA	Uncharacterized protein
GRMZM2G082372	cluster1	4.68406	9.05275	14.5785	15.5101	8.2156	8.64927	NA	Wiscott-Aldrich syndrome
GRMZM2G126946	cluster1	2.20586	5.32456	6.89903	5.6231	7.05366	7.48805	NA	Putative calcium-dependent lipid-binding (CaLB domain) family protein; Uncharacterized protein
GRMZM2G414915	cluster1	18.079	20.4243	56.6457	63.7872	26.7307	27.2315	NA	Putative subtilase family protein; Uncharacterized protein
GRMZM2G015281	cluster1	0.490104	0.797874	1.54585	1.38785	1.04027	0.960695	ereb4	NA
GRMZM2G151319	cluster1	6.82816	10.3717	21.5653	14.3962	11.792	9.94919	NA	Carboxyl-terminal proteinase; Uncharacterized protein
GRMZM2G158313	cluster1	0.416559	0.415539	1.32489	1.37683	0.815649	0.604515	bzip89	BZIP transcription factor family protein; Uncharacterized protein
GRMZM2G172506	cluster1	2.19081	4.00122	6.97399	7.34668	6.04948	6.1019	NA	NA
AC235540.1_FG002	cluster1	2.0025	1.96231	6.37984	4.37812	2.48797	1.34084	NA	NA
GRMZM2G153444	cluster1	1.0311	2.00808	3.35695	3.30432	1.45468	2.39206	NA	Uncharacterized protein
GRMZM2G114673	cluster1	1.82742	1.61154	5.9864	3.64489	4.58143	3.55531	NA	DnaJ domain containing protein
GRMZM2G104288	cluster1	3.27252	7.66338	10.8048	7.91469	7.82175	8.50516	NA	Uncharacterized protein
GRMZM2G149481	cluster1	33.0512	50.528	110.364	94.7678	77.9893	69.2454	si606065d12	Auxin transporter-like protein 3
GRMZM2G099285	cluster1	1.73669	2.48447	5.87538	6.27145	3.67227	3.58307	NA	Putative uncharacterized protein
GRMZM2G317900	cluster1	11.1864	18.7082	37.8724	38.1016	32.2248	28.1184	arftf35	NA
GRMZM2G106413	cluster1	25.4243	85.1736	86.9416	81.8422	94.9934	105.22	NA	Wound induced protein
GRMZM2G131012	cluster1	0.53418	1.22741	1.77458	1.4626	1.61139	2.09361	NA	Uncharacterized protein
GRMZM2G027688	cluster1	0.17027	0.48067	0.587855	0.955424	0.999449	0.39959	mab13	NA
GRMZM2G114680	cluster1	0.40851	0.473191	1.41213	1.48669	0.922972	0.573913	gras70	Uncharacterized protein
GRMZM2G005624	cluster1	8.00946	30.1899	27.9647	22.3725	30.0423	34.2914	gt1	Uncharacterized protein
GRMZM2G374085	cluster1	6.58002	22.3571	23.1241	13.9154	19.383	31.7901	NA	Uncharacterized protein
GRMZM2G370081	cluster1	0.692457	0.815003	2.48842	1.22121	1.00563	1.1814	GRMZM2G370081	NA
GRMZM5G883741	cluster1	13.3858	31.5363	48.1104	44.1991	40.4682	37.8101	NA	NA
GRMZM2G025240	cluster1	40.0855	42.9849	145.11	114.256	113.31	129.429	NA	Uncharacterized protein
GRMZM2G131822	cluster1	18.7164	29.3344	68.228	41.3304	29.7598	23.0629	NA	NA
GRMZM2G015049	cluster1	0.336857	0.11154	1.24606	1.68704	0.549616	0.314932	NA	Uncharacterized protein
GRMZM2G176774	cluster1	0.721617	1.24713	2.6883	2.30009	2.82279	2.59888	NA	Uncharacterized protein
GRMZM2G177510	cluster1	0.272965	0.769188	1.01248	1.22269	1.31494	0.995551	NA	Putative O-glycosyl hydrolase family 17 protein; Uncharacterized protein
GRMZM2G020158	cluster1	0.430867	0.56888	1.58502	0.933359	1.11145	1.22679	NA	Uncharacterized protein
GRMZM2G176430	cluster1	0.694421	7.72993	2.5775	5.8428	3.44296	2.39615	NA	Uncharacterized protein
GRMZM2G075436	cluster1	0.977223	0.675903	3.56075	4.28189	2.98018	2.03085	NA	NA
GRMZM2G072376	cluster1	1.55976	2.6668	5.89476	6.10746	4.18605	3.11722	bhlh56	NA
AC207755.3_FG005	cluster1	3.68225	6.87175	14.0231	31.5834	13.7364	8.38792	NA	Uncharacterized protein
GRMZM2G365688	cluster1	0.33559	0.713267	1.30985	1.03251	0.871057	1.37579	NA	NA
GRMZM2G134703	cluster1	6.4956	20.5212	25.5556	30.5352	24.7465	28.0854	NA	Putative cytochrome P450 superfamily protein; Uncharacterized protein
GRMZM2G137046	cluster1	8.30705	9.44023	32.6149	21.008	6.84037	26.0158	bzip61	Transcription factor HY5; Uncharacterized protein
GRMZM2G111533	cluster1	23.3561	46.0594	92.0675	67.827	74.8055	82.969	NA	Uncharacterized protein
GRMZM2G086410	cluster1	0.152058	0.10499	0.621986	0.893955	0.511443	0.270238	NA	Putative thaumatin domain family protein
GRMZM2G377079	cluster1	0.16388	0.359901	0.725288	0.651006	0.518323	0.395503	NA	NA
GRMZM2G061515	cluster1	2.26771	3.67878	9.17549	8.06484	3.1756	1.36387	NA	NA
AC191961.3_FG009	cluster1	0.257543	0.350983	1.0546	0.906561	0.847088	0.933231	NA	NA
GRMZM2G104299	cluster1	1.17466	6.07119	4.87649	4.80163	4.25202	4.19015	NA	NA
GRMZM6G303298	cluster1	4.37231	8.74352	18.5274	12.395	13.6624	12.2414	NA	NA
GRMZM2G361115	cluster1	4.36346	3.9319	18.6632	7.87393	7.90543	10.8994	NA	Uncharacterized protein
GRMZM2G057753	cluster1	2.32549	3.01941	9.93088	8.70807	7.12317	4.13547	ofp38	Uncharacterized protein
GRMZM2G009282	cluster1	35.1805	36.2744	152.03	189.929	137.128	104.185	NA	Uncharacterized protein
GRMZM2G162109	cluster1	0.375567	0.942015	1.63901	1.5054	1.82546	1.61889	NA	Uncharacterized protein
GRMZM2G526668	cluster1	4.26826	13.2381	18.8472	13.1633	11.0382	10.9066	bhlh40	Putative HLH DNA-binding domain superfamily protein
GRMZM2G011269	cluster1	8.47519	30.2773	37.6826	31.9951	15.2899	26.681	NA	Mpv17 / PMP22 family protein
AC190609.3_FG004	cluster1	3.52697	7.96082	16.4477	16.7929	17.5446	12.5808	NA	Uncharacterized protein
GRMZM2G129413	cluster1	61.2979	113.59	287.942	161.762	140.859	118.629	aic1	Auxin transporter-like protein 3
GRMZM5G893055	cluster1	1.21519	2.1588	5.81317	3.95302	3.55378	4.78762	NA	Uncharacterized protein
GRMZM2G043035	cluster1	26.3343	33.9587	125.628	46.1405	92.868	108.558	NA	Uncharacterized protein
GRMZM2G070873	cluster1	0.821351	2.30774	4.0751	3.72386	4.59953	4.10789	NA	Putative uncharacterized protein
GRMZM2G061702	cluster1	6.77376	50.9469	35.3894	42.7949	32.391	29.0231	NA	Uncharacterized protein
GRMZM2G013538	cluster1	1.67182	1.08561	8.87868	1.07036	4.38497	4.10549	NA	NA
GRMZM2G137551	cluster1	4.11973	10.9805	22.0364	17.3958	16.8132	12.8207	NA	NA
GRMZM2G004696	cluster1	52.4222	189.448	280.565	174.647	135.399	141.863	iaa8	Uncharacterized protein
GRMZM2G098643	cluster1	28.5368	65.8364	154.407	124.451	78.9187	56.5118	pin1	Putative auxin efflux carrier
GRMZM2G331770	cluster1	1.6782	1.452	9.10868	5.86643	3.24335	1.42778	NA	Uncharacterized protein
GRMZM2G043584	cluster1	11.4923	29.9046	62.5084	37.0821	26.4065	19.6657	NA	Uncharacterized protein
GRMZM2G360680	cluster1	0.178778	0.475703	0.94043	0.88882	1.318	0.723119	NA	Putative uncharacterized protein
GRMZM2G105364	cluster1	11.0026	19.2233	61.0227	49.5082	32.1717	26.668	GRMZM2G105364	GAST1 protein; Uncharacterized protein
GRMZM2G094017	cluster1	2.49078	3.15615	13.866	18.5668	6.75042	6.2979	NA	Uncharacterized protein
GRMZM2G025133	cluster1	3.40327	9.94388	19.1412	33.5004	26.7532	10.9393	NA	Uncharacterized protein
GRMZM2G419455	cluster1	0.102027	0.367393	0.587464	0.431487	0.456309	0.576911	NA	NA
GRMZM5G858653	cluster1	0.245084	0.81939	1.50557	1.97061	0.774752	0.273259	NA	Uncharacterized protein
GRMZM2G140032	cluster1	0.193544	0.828057	1.25836	0.846396	0.917004	1.53363	NA	Uncharacterized protein
GRMZM2G363982	cluster1	0.398032	0.480953	2.54978	1.59502	1.41314	1.24172	NA	Putative uncharacterized protein
GRMZM2G321747	cluster1	0.531546	1.58619	3.28655	2.36599	2.69274	3.81074	NA	NA
GRMZM2G074236	cluster1	0.993623	7.45881	6.34884	5.45754	7.22768	6.22308	NA	NA
GRMZM2G139029	cluster1	1.00762	4.89009	6.45213	6.58947	2.90348	2.27937	NA	Putative HLH DNA-binding domain superfamily protein isoform 1; Putative HLH DNA-binding domain superfamily protein isoform 2; Uncharacterized protein
GRMZM2G397675	cluster1	2.57043	13.6901	16.8906	18.7487	14.0773	15.2173	NA	NA
GRMZM2G046622	cluster1	0.395111	1.28084	2.71992	3.02724	1.36454	1.63448	NA	NA
GRMZM2G477340	cluster1	6.31821	11.0783	44.5804	89.3383	46.2786	37.7004	NA	Uncharacterized protein
GRMZM2G443612	cluster1	0.30435	0.449479	2.1526	1.02227	1.26304	1.26043	NA	Uncharacterized protein
GRMZM2G317262	cluster1	3.18041	10.6027	23.1641	32.5471	18.0758	20.8182	NA	Uncharacterized protein
GRMZM2G146463	cluster1	6.62972	9.89469	50.7421	39.9476	44.5211	46.1209	NA	Alpha-galactosidase
GRMZM2G029400	cluster1	0.565287	0.757657	4.40261	5.86447	3.84863	1.56315	NA	Uncharacterized protein
GRMZM2G470981	cluster1	0.20521	0.427468	1.64812	0.758116	0.81662	0.901395	NA	NA
AC231226.2_FG001	cluster1	0.365039	0.975832	3.03586	2.31329	3.10266	2.73981	NA	Uncharacterized protein
GRMZM2G054277	cluster1	0.689311	0.888212	5.59441	8.22659	5.05375	4.27125	nactf63	Uncharacterized protein
GRMZM2G178046	cluster1	1.31506	0.90791	12.1072	6.17948	2.51475	2.24187	NA	Uncharacterized protein
GRMZM2G035969	cluster1	0.365758	1.47158	3.85674	7.78183	3.18129	1.77422	NA	NA
GRMZM2G121621	cluster1	1.41433	5.52414	14.8931	12.7874	10.4692	9.8452	NA	Uncharacterized protein
GRMZM2G114046	cluster1	1.28304	6.74134	13.7915	13.1085	9.42548	11.6904	NA	Uncharacterized protein
GRMZM2G144097	cluster1	1.46389	6.13697	16.4771	7.92917	6.46299	5.33485	NA	Uncharacterized protein
GRMZM2G090603	cluster1	21.5205	39.9888	248.166	190.728	143.023	121.435	NA	Uncharacterized protein
GRMZM2G437758	cluster1	0.500399	2.80688	5.66861	2.81107	2.64968	3.85274	NA	Putative uncharacterized protein
GRMZM2G010372	cluster1	0.164311	0.143965	1.9988	1.54977	0.18227	0.00921524	NA	Uncharacterized protein
GRMZM2G105419	cluster1	0.142656	0.269123	1.74635	0.659815	0.560932	0.120546	NA	NA
GRMZM5G888502	cluster1	0.0527597	0.368772	0.69056	0.445907	0.177589	0.329051	NA	Uncharacterized protein
GRMZM2G343360	cluster1	0.114779	0.284643	1.48685	2.4118	0.99511	0.378354	NA	SAUR55-auxin-responsive SAUR family member; Uncharacterized protein
GRMZM2G002286	cluster1	0.306231	1.5414	3.71663	1.80523	2.57014	2.85715	NA	Esterase/lipase/thioesterase
GRMZM2G342963	cluster1	0.585216	3.9793	7.45196	5.16552	4.69243	3.74306	NA	Uncharacterized protein
GRMZM2G162271	cluster1	0.201946	0.498969	2.67288	1.30524	0.845774	0.376282	NA	NA
GRMZM2G412207	cluster1	1.37164	1.49547	18.5525	33.0991	20.4076	12.6754	NA	Uncharacterized protein
GRMZM2G376548	cluster1	0.102802	0.329398	1.39385	1.26852	1.48065	0.504519	NA	NA
GRMZM2G027052	cluster1	4.65079	13.3202	64.4687	58.5178	26.6605	30.7529	NA	Uncharacterized protein
GRMZM2G347931	cluster1	0.131464	0.212721	1.87194	1.8482	1.78083	1.19087	NA	Uncharacterized protein
GRMZM2G130953	cluster1	3.11899	25.1405	46.5736	42.9236	21.957	21.9667	bif1	IAA1-auxin-responsive Aux/IAA family member; Uncharacterized protein
GRMZM2G156054	cluster1	0.164771	0.0806998	2.75842	1.98518	1.52784	1.23015	NA	Uncharacterized protein
GRMZM2G111354	cluster1	0	0	0.236963	0.75887	0.181907	0.183446	wrky22	Putative WRKY DNA-binding domain superfamily protein
GRMZM2G433609	cluster1	0.211072	0.453516	3.30035	2.25676	1.48718	1.14643	NA	Uncharacterized protein
AC217051.3_FG005	cluster1	0.129564	1.36676	1.93908	2.08507	1.93901	1.44144	NA	Uncharacterized protein
GRMZM2G004516	cluster1	0.126088	0.126058	2.20819	4.44927	1.53811	1.48366	NA	Uncharacterized protein
GRMZM2G153103	cluster1	0.514536	3.06691	9.31942	5.0708	2.9661	2.42041	NA	Uncharacterized protein
GRMZM5G883759	cluster1	0.713036	4.17032	13.588	7.56268	3.97476	3.39262	NA	Putative uncharacterized protein
GRMZM2G030772	cluster1	0	0.477923	0.220837	0.186712	0.457475	0.24429	NA	Uncharacterized protein
GRMZM2G369469	cluster1	0.132693	0.449402	2.44206	0.842675	0.905582	0.448494	NA	Uncharacterized protein
GRMZM2G345270	cluster1	0.132347	0.752874	2.49479	1.57813	0.909821	0.790649	NA	NA
GRMZM2G165530	cluster1	1.39941	5.71873	28.8151	39.402	25.581	13.5363	NA	Putative uncharacterized protein
GRMZM2G702529	cluster1	0.648216	4.68376	13.7242	10.9546	8.45717	12.9994	NA	Putative cytochrome P450 superfamily protein
GRMZM2G152796	cluster1	0.33869	1.02569	7.49854	5.70546	2.2539	2.13648	iaa19	Uncharacterized protein
GRMZM2G406196	cluster1	0.0852274	0.202816	2.16901	1.86084	1.22583	1.57439	NA	NA
GRMZM2G462046	cluster1	0.141409	0.344531	3.62999	7.09873	3.30654	2.51236	NA	Uncharacterized protein
GRMZM2G015433	cluster1	0.0218088	0.0783627	0.61245	1.06945	0.28717	0.173449	wrky119	Putative WRKY DNA-binding domain superfamily protein
GRMZM2G459824	cluster1	0.24625	1.50705	7.87088	5.47976	3.33473	3.349	NA	NA
GRMZM2G007615	cluster1	0.0643918	0.731567	2.2052	2.25247	1.25331	0.55924	NA	NA
GRMZM5G889769	cluster1	0.0299993	1.95255	1.0548	2.2442	1.46937	1.08714	NA	Thioredoxin reductase
GRMZM2G159456	cluster1	2.90778	34.5877	109.592	124.389	85.9879	46.5967	bhlh84	DNA binding protein
GRMZM2G066219	cluster1	0.210972	1.26409	8.21274	3.53163	2.50985	1.69915	NA	NA
GRMZM6G404540	cluster1	0.140734	2.05527	6.79276	4.44467	5.05168	4.47287	NA	NA
GRMZM2G338431	cluster1	0.0678277	0.778458	3.24862	1.57694	1.11826	0.770212	NA	Strictosidine synthase 1
GRMZM2G018004	cluster1	0.0293252	0.125701	1.75327	1.65081	1.16505	1.25495	NA	Putative uncharacterized protein
GRMZM5G891187	cluster1	0.120333	1.64339	6.42723	8.93467	4.61911	0.621457	NA	Nodulin-like protein; Uncharacterized protein
GRMZM2G151656	cluster1	0.0853859	0.75732	5.21372	3.07522	0.629477	0.103212	NA	SAUR52-auxin-responsive SAUR family member
AC149818.2_FG009	cluster1	0.147462	2.24427	9.94203	9.05969	4.17431	5.98142	rtcl1	Putative LOB domain-containing family protein; RTCS-like protein
GRMZM2G157927	cluster1	0.0116877	0.206936	0.92126	1.04263	0.642407	0.544874	c3h21	Uncharacterized protein
GRMZM2G094418	cluster1	0.0504299	0.634678	3.30132	3.0472	1.79819	1.71712	NA	NA
GRMZM2G156392	cluster1	0.0207236	0.129514	1.91037	1.28833	0.430313	0.165479	NA	SAUR55-auxin-responsive SAUR family member; Uncharacterized protein
GRMZM2G033359	cluster1	1.42513	178.018	107.765	226.585	116.628	108.377	NA	Uncharacterized protein
GRMZM2G086530	cluster1	0.0217014	0.353708	2.1066	0.711442	1.11752	0.591732	NA	Uncharacterized protein
GRMZM2G156451	cluster1	0	0.132316	1.14514	0.923835	0.41265	0.0922051	NA	NA
GRMZM2G021796	cluster1	0.972268	7.86083	86.9502	77.3897	67.1607	51.9427	NA	Putative RING zinc finger domain superfamily protein; Uncharacterized protein
GRMZM2G138693	cluster1	0	0.454636	1.41407	2.75356	2.22777	0.377693	NA	Putative uncharacterized protein
GRMZM2G112965	cluster1	0.787161	19.2437	80.7267	48.9264	38.3506	33.8731	NA	Uncharacterized protein
GRMZM5G803334	cluster1	0.0247916	0.33884	2.95305	2.93536	2.97912	2.33313	NA	Uncharacterized protein
GRMZM2G414315	cluster1	0	0.190118	1.02947	0.482084	0.655621	0.317836	wrky20	Putative WRKY DNA-binding domain superfamily protein
GRMZM2G339909	cluster1	0.00947838	0.139217	1.19431	1.01544	0.607987	0.697	NA	Uncharacterized protein
GRMZM2G042429	cluster1	0	0.337211	1.9069	0.766266	0.497461	0.0563038	NA	SAUR52-auxin-responsive SAUR family member
GRMZM5G858593	cluster1	0.320301	7.09964	39.4918	31.6222	20.1929	15.7963	NA	Uncharacterized protein
AC200065.5_FG009	cluster1	0.0753477	1.18885	10.0857	10.8588	8.82345	4.55661	NA	Uncharacterized protein
GRMZM2G343365	cluster1	0	0.186611	1.70765	1.35884	0.6457	0.101708	NA	Uncharacterized protein
GRMZM2G363004	cluster1	0	0.0221657	1.60871	0.666107	0.0567173	0.0562086	NA	NA
GRMZM5G835903	cluster1	0.0306294	0.57413	4.10204	4.12389	0.878256	0.141082	NA	SAUR55-auxin-responsive SAUR family member
GRMZM2G093020	cluster1	0.0137977	1.17741	2.33394	1.41003	0.662976	0.673815	bzip45	Light-inducible protein CPRF-2
GRMZM2G383735	cluster1	0	1.13619	6.24859	8.08734	2.27408	1.6959	NA	Putative uncharacterized protein
GRMZM5G878346	cluster1	0	0.134918	2.89867	1.65832	0.968366	0.189344	NA	Uncharacterized protein
GRMZM2G045544	cluster1	1.74852	2.77791	3.33801	3.54068	3.04612	3.12417	phd22	NA
GRMZM2G098460	cluster1	1.90374	5.59074	3.63176	3.8311	3.05088	5.16665	NA	Drought-induced protein 1; Uncharacterized protein
GRMZM5G849107	cluster1	2.7489	3.33926	3.74437	5.50811	3.85836	3.0889	ps1	Lycopene beta-cyclase; Uncharacterized protein
GRMZM2G039828	cluster1	36.3953	45.7338	65.6272	73.6994	53.602	70.8705	bzip6	Uncharacterized protein
GRMZM2G073376	cluster1	3.65724	3.79808	6.10195	7.40679	5.80787	4.76962	NA	Indole-3-acetate beta-glucosyltransferase
GRMZM2G135283	cluster1	26.2968	44.6029	48.3911	53.502	49.2088	45.8997	NA	Serine hydroxymethyltransferase
GRMZM2G029029	cluster1	8.16037	21.8048	27.654	16.6847	20.8599	31.3791	NA	Uncharacterized protein
GRMZM2G003635	cluster1	4.01341	5.61646	7.10431	8.16263	7.10857	6.72831	NA	NA
GRMZM2G312970	cluster1	5.52533	9.3707	11.0106	11.3049	10.1655	11.7702	NA	Uncharacterized protein
GRMZM2G151406	cluster1	5.15787	17.9677	14.0123	10.557	16.8896	18.0014	NA	Uncharacterized protein
GRMZM2G169967	cluster1	12.7094	9.228	23.4402	26.0739	21.3986	17.3247	NA	Beta-expansin 3
GRMZM2G104176	cluster1	1.22265	2.3734	3.66429	2.45659	2.15715	2.21334	iaa7	Uncharacterized protein
GRMZM2G024180	cluster1	5.12388	8.95745	10.2441	10.5669	10.2865	10.8668	NA	Uncharacterized protein
GRMZM2G112957	cluster1	2.25501	3.65197	5.17631	4.68422	3.18785	2.87214	NA	NA
GRMZM2G140342	cluster1	9.61829	13.6008	19.2172	19.8497	18.0264	17.91	NA	TMEM87A protein; Uncharacterized protein
GRMZM2G163141	cluster1	3.00011	5.31455	5.70904	6.17662	4.69861	4.54267	NA	Uncharacterized protein
GRMZM2G175499	cluster1	7.60703	7.87442	10.1642	15.7338	10.5274	6.03964	NA	Pectinesterase
GRMZM2G375999	cluster1	0.605139	1.03047	1.17894	1.25493	0.959621	1.16079	NA	Uncharacterized protein
GRMZM2G093705	cluster1	2.52297	4.82092	4.65733	5.35449	5.05176	3.63977	NA	ATPase
GRMZM2G313448	cluster1	15.7938	18.026	27.9969	33.1448	32.3861	22.8292	NA	Uncharacterized protein
GRMZM2G063492	cluster1	8.61989	18.1496	24.8016	18.1524	18.3697	21.8775	NA	Sodium/hydrogen exchanger
GRMZM2G025867	cluster1	14.9199	43.2525	58.3418	31.6325	41.7407	50.0748	NA	Prolyl 4-hydroxylase 5; Prolyl 4-hydroxylase alpha-2 subunit
GRMZM2G074267	cluster1	13.6922	10.4792	25.571	29.0569	21.1113	15.1827	pin2	Putative auxin efflux carrier
GRMZM2G071089	cluster1	3.61499	3.48296	4.69232	7.83961	4.81052	2.29159	NA	DREPP2 protein; Uncharacterized protein
GRMZM2G035405	cluster1	15.901	33.0983	46.2484	34.5158	27.7414	28.1484	arftf18	Auxin response factor 18
GRMZM2G318408	cluster1	6.21624	7.98269	11.6635	13.4561	10.2023	12.709	NA	RING zinc finger protein-like
GRMZM2G045243	cluster1	1.58926	1.15199	3.00164	3.45282	1.30565	1.08609	NA	SAUR37-auxin-responsive SAUR family member; Uncharacterized protein
GRMZM2G481730	cluster1	4.5611	8.25128	8.66743	9.98137	9.06848	7.12025	NA	Putative RNA-dependent RNA polymerase
GRMZM2G053261	cluster1	9.38697	16.9889	18.2431	20.5465	19.0447	20.3546	NA	Putative casein kinase family protein
GRMZM2G066449	cluster1	4.03449	12.9736	11.7558	8.77062	8.34779	12.8467	NA	NA
GRMZM2G133558	cluster1	0.553245	0.978768	1.38341	1.23702	0.90379	1.25251	NA	Uncharacterized protein
GRMZM2G088870	cluster1	1.19644	3.36195	3.28866	2.63949	2.87707	2.8567	NA	NA
GRMZM5G858249	cluster1	23.7014	35.0015	43.8162	52.6319	45.6516	43.4908	NA	Uncharacterized protein
GRMZM2G161728	cluster1	18.8366	33.2385	50.9649	42.1614	44.312	42.5182	NA	Uncharacterized protein
GRMZM2G390076	cluster1	10.7248	21.3632	20.6212	24.119	21.3667	23.2463	NA	Serine/threonine-protein phosphatase
GRMZM2G141679	cluster1	66.7004	139.249	139.004	150.213	153.816	143.635	ereb109	NA
GRMZM2G456023	cluster1	5.52195	13.8992	12.9833	12.4442	13.8731	14.1356	NA	Uncharacterized protein
GRMZM5G851914	cluster1	2.00141	3.70779	3.99198	4.58728	3.88588	3.67488	NA	Uncharacterized protein
GRMZM2G004709	cluster1	3.39182	4.38754	7.2406	7.70078	5.10063	7.80442	NA	EREBP-4 like protein; Uncharacterized protein
GRMZM2G463726	cluster1	5.81119	9.53421	20.4882	13.3238	14.736	14.5295	NA	Uncharacterized protein
GRMZM2G021035	cluster1	0.762121	1.50973	1.3877	1.71742	1.40258	1.40668	NA	NA
GRMZM2G180372	cluster1	1.77192	2.71154	2.98132	4.16306	3.2018	2.97391	NA	Uncharacterized protein
GRMZM2G060842	cluster1	6.48154	16.3889	22.1922	15.0885	8.15528	29.4917	NA	Uncharacterized protein
GRMZM2G142344	cluster1	16.0962	29.1296	51.6038	37.7115	37.538	39.8791	NA	DedA; Uncharacterized protein
GRMZM2G175134	cluster1	3.25927	6.09338	5.7046	7.69028	5.90296	3.44978	gst14	Glutathione S-transferase GST 14; Uncharacterized protein
GRMZM2G082544	cluster1	4.20237	6.86302	10.4063	10.0262	8.65908	8.7914	NA	Uncharacterized protein
GRMZM2G103805	cluster1	3.12426	9.1266	10.9477	7.41939	8.03486	9.35304	NA	Uncharacterized protein
GRMZM2G036113	cluster1	2.72461	2.69028	4.46926	6.53576	4.06505	3.60374	NA	Uncharacterized protein
GRMZM2G336908	cluster1	0.601086	1.20128	1.79423	1.45237	1.13993	1.42606	NA	Riboflavin biosynthesis protein ribAB
GRMZM2G032163	cluster1	19.0316	41.088	47.2507	46.3244	48.4379	51.0639	NA	Uncharacterized protein
GRMZM2G410704	cluster1	0.71665	1.2856	1.97972	1.74872	2.07692	1.65447	NA	NA
GRMZM2G004898	cluster1	0.391805	0.874161	1.85655	0.949983	1.11812	2.04924	NA	Uncharacterized protein
GRMZM2G017894	cluster1	2.65594	6.2913	8.85145	6.50442	7.05992	6.94206	NA	NA
GRMZM2G172183	cluster1	3.66352	10.9664	10.0784	9.16754	8.75427	8.80646	NA	Uncharacterized protein
GRMZM2G314386	cluster1	10.3585	21.9566	36.1709	26.0042	27.5934	29.2609	NA	Uncharacterized protein
GRMZM2G125513	cluster1	8.60468	11.927	13.9706	21.8417	13.9787	12.2946	NA	Uncharacterized protein
GRMZM2G122431	cluster1	25.8846	38.1373	51.6986	65.6886	47.7102	39.9102	NA	NA
GRMZM2G065344	cluster1	1.71801	4.52971	6.29049	4.61186	4.20445	3.95301	NA	NA
GRMZM5G832994	cluster1	1.39846	3.06893	3.69922	3.82841	3.26109	3.0633	rtl1	Uncharacterized protein
GRMZM2G177984	cluster1	0.805487	3.19247	3.38513	2.21999	2.39163	2.54846	NA	Uncharacterized protein
GRMZM2G046729	cluster1	3.35043	7.402	11.9522	9.2415	5.99518	5.77198	NA	Putative leucine-rich repeat receptor-like protein kinase family protein; Uncharacterized protein
GRMZM5G896859	cluster1	1.21755	1.87248	2.27195	3.39416	2.72735	1.23886	NA	Uncharacterized protein
GRMZM2G160237	cluster1	27.9461	64.4842	117.754	77.9064	76.6325	73.3571	NA	Serine/threonine-protein phosphatase
GRMZM2G120408	cluster1	3.85359	5.83943	6.68495	10.859	7.02263	6.74092	NA	Uncharacterized protein
GRMZM2G101058	cluster1	3.43359	8.01337	8.03171	9.63231	5.85747	6.83981	gata28	GATA transcription factor 9; Putative GATA transcription factor family protein; Uncharacterized protein
GRMZM2G064590	cluster1	2.74087	4.37071	5.17286	7.83092	5.33047	3.4837	NA	Uncharacterized protein
GRMZM2G114322	cluster1	48.0017	126.832	144.933	140.013	105.328	96.6008	NA	NA
GRMZM2G134235	cluster1	16.8969	46.7737	51.7643	50.3516	41.6177	44.2485	NA	Uncharacterized protein
GRMZM2G121189	cluster1	1.23193	5.75462	2.87712	3.69234	4.06118	3.66919	NA	Putative uncharacterized protein
GRMZM2G092747	cluster1	0.339802	0.897349	0.630228	1.06992	0.823323	0.654425	NA	Uncharacterized protein
GRMZM2G173863	cluster1	12.1982	44.0995	73.6141	39.0641	35.7962	40.7565	NA	Uncharacterized protein
GRMZM2G166665	cluster1	1.44648	4.19876	4.14122	4.73759	5.56094	4.10832	NA	Lipopolysaccharide-modifying protein
GRMZM2G074361	cluster1	5.67478	7.49286	10.4933	19.0673	8.27035	6.30155	prf1	Profilin-1
GRMZM2G004180	cluster1	3.25935	8.11396	18.4933	11.2473	9.55892	9.12215	NA	Uncharacterized protein
GRMZM2G093858	cluster1	1.16298	3.82666	3.94844	3.95148	3.91142	3.6119	NA	Uncharacterized protein
GRMZM2G124423	cluster1	4.08898	5.50859	10.4657	14.2311	10.6036	10.6407	NA	NA
GRMZM2G053707	cluster1	8.85924	35.973	43.9225	30.9523	25.3275	24.8795	NA	NA
GRMZM2G150714	cluster1	4.15498	8.08326	27.0661	15.3665	14.3526	15.9864	NA	Putative leucine-rich repeat receptor-like protein kinase family protein; Uncharacterized protein
GRMZM2G111926	cluster1	0.285628	1.00362	2.31618	1.07273	0.389016	1.21495	sweet17b	Uncharacterized protein
GRMZM2G040278	cluster1	1.59551	6.50768	21.0423	6.1865	10.2442	15.9706	NA	F-box protein GID2; Uncharacterized protein
GRMZM2G175562	cluster1	0.433847	0.549045	1.07701	1.66317	0.213313	0.611129	oec33	Uncharacterized protein
GRMZM2G508335	cluster1	0.414799	0.991584	2.01287	1.53923	1.3074	1.26243	NA	Uncharacterized protein
GRMZM2G334514	cluster1	0.471124	0.508072	1.39403	1.83322	1.52432	0.848923	NA	NA
GRMZM2G127072	cluster1	2.77707	8.17317	10.7591	10.8056	8.84466	7.6342	NA	Uncharacterized protein
GRMZM2G000489	cluster1	1.33389	7.51856	6.42053	5.28371	8.04293	5.88964	NA	Gibberellin receptor GID1L2; Uncharacterized protein
GRMZM2G111998	cluster1	0.419998	0.245218	0.945867	1.64557	0.513589	0.121483	NA	Putative O-Glycosyl hydrolase superfamily protein; Uncharacterized protein
GRMZM2G088524	cluster1	14.8139	31.0846	58.9015	60.4451	51.7698	39.1528	mybr32	Uncharacterized protein
GRMZM5G835276	cluster1	1.52476	3.04957	8.91105	6.33402	4.9802	4.63642	NA	Alpha-L-fucosidase 2; Uncharacterized protein
GRMZM2G301823	cluster1	1.71654	9.57632	12.8449	7.73087	4.85561	8.55404	NA	NA
GRMZM2G175232	cluster1	0.759142	1.83564	2.33413	3.56397	3.10551	1.99154	myb99	Putative MYB DNA-binding domain superfamily protein; Uncharacterized protein
GRMZM2G150406	cluster1	1.50971	5.11523	8.10309	7.37997	6.49827	7.17708	NA	Uncharacterized protein
GRMZM2G078210	cluster1	1.47063	6.93407	7.6687	7.47715	5.64591	7.4504	NA	Putative uncharacterized protein
GRMZM2G331638	cluster1	2.12838	7.74112	26.1041	11.5494	10.3201	7.32183	NA	Dopamine beta-monooxygenase
GRMZM2G069807	cluster1	0.149886	0.946225	1.87424	0.786936	0.840548	0.991996	NA	Uncharacterized protein
AC235539.1_FG001	cluster1	0.25374	1.06249	0.804584	1.46967	0.721426	0.688933	NA	NA
GRMZM2G180620	cluster1	1.81125	3.18519	7.42046	10.7901	6.24035	6.9665	NA	Uncharacterized protein
GRMZM2G154221	cluster1	2.87392	5.17604	12.7728	17.4547	6.68992	13.3939	NA	Uncharacterized protein
GRMZM2G137151	cluster1	16.2514	36.3302	63.5121	98.4847	67.0849	61.0223	dxs1	Uncharacterized protein
GRMZM2G335685	cluster1	0.659137	2.0076	5.60586	4.06393	5.58628	4.24011	NA	Putative uncharacterized protein
AC225790.2_FG003	cluster1	0.905726	4.93507	8.23394	5.59843	5.19041	5.95561	NA	NA
GRMZM2G135452	cluster1	2.43181	25.7915	19.6835	17.569	15.8238	14.4885	ereb72	Putative AP2/EREBP transcription factor superfamily protein
GRMZM2G074687	cluster1	4.89224	22.2925	45.8191	37.7609	40.1137	42.561	NA	NA
GRMZM2G126765	cluster1	8.70837	44.2291	112.88	70.2114	74.5631	47.0251	NA	Uncharacterized protein
GRMZM2G129361	cluster1	0.290455	2.98589	3.45946	2.42416	2.53063	2.93114	NA	Putative uncharacterized protein
GRMZM2G153184	cluster1	0.329875	0.730717	1.04268	2.81311	0.422116	0.855883	NA	Chlorophyll a-b binding protein 4; Uncharacterized protein
GRMZM2G030465	cluster1	10.1728	74.8004	55.7855	92.1926	43.688	54.6074	iaa24	IAA9-auxin-responsive Aux/IAA family member
GRMZM2G091964	cluster1	2.76455	11.4719	39.1527	25.8652	19.8972	19.2768	ca2p16	Nuclear transcription factor Y subunit A-1; Uncharacterized protein
GRMZM2G701109	cluster1	0.080832	0.24146	0.37234	0.681978	0.563742	0.253243	NA	Uncharacterized protein
GRMZM2G165090	cluster1	0.0364257	0.222529	1.18498	0.410423	0.0990468	0.481886	bhlh158	NA
GRMZM2G110279	cluster1	1.25707	6.39699	18.5387	15.8687	12.02	10.9416	NA	Uncharacterized protein
GRMZM2G459645	cluster1	0.0892643	0.555111	0.865109	1.15146	1.10115	0.25984	NA	Uncharacterized protein
GRMZM2G365188	cluster1	0.048803	2.94164	3.9275	1.01328	1.62148	4.18311	NA	NA
GRMZM2G330757	cluster1	0.0298345	0.917509	1.22258	0.899323	0.359851	0.727648	NA	Putative uncharacterized protein
GRMZM2G149714	cluster1	0	0.47642	0.231383	0.260598	0.281993	0.218197	NA	Uncharacterized protein
GRMZM5G834952	cluster1	0	0.441029	1.62942	0.942887	0.236757	0.515168	NA	Uncharacterized protein
GRMZM2G086761	cluster1	0.0312012	1.11624	3.57852	1.58958	1.03995	1.56128	NA	Uncharacterized protein
GRMZM2G111415	cluster1	0.218824	5.0865	14.4828	12.5529	12.5626	10.1696	ereb15	Putative AP2/EREBP transcription factor superfamily protein
GRMZM2G149360	cluster1	0.0823092	1.40763	5.00289	5.39906	8.09079	2.41155	NA	Uncharacterized protein
GRMZM2G369803	cluster1	0.0473614	0.517918	7.71869	4.6839	1.92956	1.34932	NA	Putative FAD-binding Berberine family protein
GRMZM2G104109	cluster1	0.133492	4.43667	59.9076	48.1846	46.7546	33.504	NA	Peroxidase 1
GRMZM2G083427	cluster1	4.33673	5.8293	7.30121	7.82566	8.67791	6.88574	NA	ASC1-like protein; Uncharacterized protein
GRMZM2G351577	cluster1	2.87185	6.16167	7.95484	5.0719	5.84327	5.33962	NA	Putative homeodomain-like transcription factor superfamily protein
GRMZM2G030122	cluster1	2.3425	4.67236	5.57653	4.65925	4.88852	4.85154	NA	Uncharacterized protein
GRMZM2G080501	cluster1	5.34875	13.8809	10.2611	9.30743	11.5449	11.433	tena3	Seed maturation protein PM36
GRMZM2G446201	cluster1	11.1136	32.8278	23.0494	19.5603	24.9255	27.0995	zar1	Auxin regulated gene involved in organ size 1; Uncharacterized protein
GRMZM2G180971	cluster1	7.22685	11.282	19.543	16.6434	17.1372	16.8318	NA	Calcium-binding carrier F55A11.4; Calcium-binding mitochondrial carrier F55A11.4; Uncharacterized protein
GRMZM2G174784	cluster1	2.72635	3.30281	5.01358	5.37845	6.66344	2.79326	ereb197	Uncharacterized protein
GRMZM2G408012	cluster1	5.46326	11.3416	17.2786	10.4644	13.6171	15.8221	gras39	NA
GRMZM2G019907	cluster1	11.7129	19.2639	23.3221	30.0851	29.8878	20.8506	bzip56	Ocs-element binding factor 3.1
GRMZM2G461569	cluster1	2.76222	5.61122	6.7717	6.79522	7.36424	7.21031	NA	Urease
GRMZM2G029690	cluster1	0.254168	1.70535	1.4306	1.66663	0.808402	1.76818	NA	Putative RING zinc finger domain superfamily protein
GRMZM2G460406	cluster1	32.3363	104.319	113.617	129.667	121.007	121.552	NA	APx4-Peroxisomal Ascorbate Peroxidase; Uncharacterized protein
GRMZM2G099382	cluster1	0.850635	0.910361	3.99844	3.97758	3.19249	3.80288	NA	Uncharacterized protein
GRMZM2G113682	cluster1	7.87884	29.6535	33.315	38.4068	35.4421	32.6941	NA	Uncharacterized protein
GRMZM2G148056	cluster1	0.628967	2.65417	8.86595	4.51911	2.90278	2.48262	NA	Two-component response regulator ARR3
GRMZM6G107785	cluster1	0.243078	0.533712	1.39168	0.837378	1.1754	0.647056	NA	F-box domain containing protein
GRMZM2G107771	cluster1	11.6361	55.956	163.719	113.147	54.5005	37.4294	NA	Uncharacterized protein
GRMZM2G146108	cluster1	0.996828	2.97667	2.12847	1.58805	4.69904	0.997277	NA	Putative auxin-induced protein family
GRMZM2G019106	cluster1	1.03196	4.35121	7.19915	6.09033	5.85826	6.90403	bzip71	Putative bZIP transcription factor superfamily protein
GRMZM2G330384	cluster1	3.62773	11.2626	32.5358	29.4026	23.7014	12.4005	NA	Uncharacterized protein
GRMZM2G069694	cluster1	3.88139	30.693	27.3901	31.6445	26.5475	31.5874	NA	Uncharacterized protein
GRMZM2G088482	cluster1	1.27409	11.2519	11.1023	8.2353	10.1141	10.7934	NA	Uncharacterized protein
GRMZM2G038015	cluster1	0.61224	2.84599	7.06272	4.93129	5.00216	4.47197	bzip24	NA
GRMZM2G407406	cluster1	0.112153	0.493382	1.12332	0.85379	0.991818	0.987618	NA	NA
GRMZM2G554962	cluster1	0.979409	2.31182	10.3605	8.60987	9.03378	7.76019	NA	NA
GRMZM2G321778	cluster1	0.279624	1.84396	3.9319	3.21537	2.87671	2.70268	tdy1	Tie-dyed 1; Tie-dyed1
AC149829.2_FG004	cluster1	0.495586	19.3376	41.7791	56.302	35.2984	31.751	bhlh97	DNA binding protein; Putative HLH DNA-binding domain superfamily protein
GRMZM2G414537	cluster1	0.483388	0.324818	0.689838	0.608365	0.178535	0.522852	NA	Uncharacterized protein
AC207722.2_FG009	cluster1	0.815848	2.46448	4.61911	5.05296	0.342039	4.67944	lhcb2	Chlorophyll a-b binding protein 1; chloroplastic
GRMZM2G322618	cluster1	5.9856	15.9923	16.9541	14.544	13.5111	11.9292	NA	Uncharacterized protein
GRMZM2G347645	cluster1	8.15078	11.7257	14.8274	12.8766	14.1225	16.4353	NA	Uncharacterized protein
GRMZM2G017409	cluster1	1.2093	1.65598	2.4125	2.66527	1.97674	2.48431	NA	NA
GRMZM2G100121	cluster1	10.2219	15.1903	20.2616	15.8308	17.5831	21.4712	umc1323	NA
GRMZM2G063851	cluster1	22.4376	54.639	36.1653	41.1427	41.4215	47.1058	cts1	Citrate synthase
GRMZM2G172357	cluster1	19.4586	33.184	35.0684	33.8553	31.8678	40.8618	NA	Grx_C4-glutaredoxin subgroup I
GRMZM2G180195	cluster1	4.90195	6.24464	9.34747	7.51572	7.91924	10.3688	NA	Uncharacterized protein
GRMZM2G172695	cluster1	3.17635	5.39583	4.88998	4.15018	2.93726	6.69414	NA	NA
GRMZM2G043193	cluster1	1.92328	3.95525	5.16601	2.99207	3.50225	4.09291	NA	Uncharacterized protein
GRMZM2G315726	cluster1	5.50596	15.484	9.52297	8.10082	10.904	12.3577	NA	Uncharacterized protein
GRMZM2G024948	cluster1	0.295093	0.542715	0.753338	0.890315	0.96705	0.665596	abi16	Uncharacterized protein
GRMZM2G323470	cluster1	6.23826	14.7159	18.5988	13.3792	14.8153	14.8243	NA	Putative coatomer beta subunit family protein
GRMZM2G035625	cluster1	3.7224	9.07751	9.8277	13.556	8.48823	8.95348	NA	Uncharacterized protein
GRMZM2G149576	cluster1	17.245	37.5875	39.6259	37.253	28.446	41.9115	NA	Uncharacterized protein
GRMZM2G071844	cluster1	14.8753	20.1206	36.2605	27.9932	27.5858	36.5271	NA	EREBP-4 like protein; Uncharacterized protein
GRMZM2G171036	cluster1	0.99473	1.83562	2.68375	1.49205	1.45253	2.50451	NA	Plant viral-response family protein
GRMZM2G169236	cluster1	0.375368	0.962041	1.08184	0.778481	0.93772	0.976188	NA	Uncharacterized protein
GRMZM2G131275	cluster1	0.436431	1.00676	1.11956	0.755308	0.769501	1.14364	NA	NA
GRMZM2G000601	cluster1	2.1546	6.85433	6.19131	5.90106	6.20782	5.81114	NA	Ubiquitin-conjugating enzyme E2-17 kDa
GRMZM2G121160	cluster1	0.578529	0.909535	1.99671	1.17763	1.84131	1.99693	NA	NA
GRMZM2G314110	cluster1	0.205369	1.00807	2.04697	1.49307	0.799369	0.793993	NA	NA
GRMZM2G070252	cluster1	2.66543	8.2045	13.6755	8.93199	9.78707	13.9645	NA	Putative uncharacterized protein
GRMZM2G450273	cluster1	0.372931	1.94259	2.67739	4.46661	2.09052	3.07655	NA	Flowering promoting factor-like 1
AC202107.3_FG001	cluster1	0.199185	1.9457	3.41762	2.79498	3.1845	2.21441	NA	Uncharacterized protein
GRMZM2G469371	cluster1	0.207308	2.93761	3.95575	3.46751	1.95485	3.80917	NA	NA
GRMZM2G128233	cluster1	0	0.341525	1.1133	1.01775	0.311377	0.38781	NA	Plant viral-response family protein
GRMZM2G107851	cluster1	0.36193	0.337233	0.444848	0.852442	0.427919	0.0678183	NA	Transferase family protein; Uncharacterized protein
GRMZM2G455440	cluster2	0.817175	3.83987	77.0249	144.796	197.567	168.258	NA	Putative uncharacterized protein
GRMZM2G084445	cluster2	0.365175	1.5252	5.42613	7.73425	15.4381	9.30024	NA	Uncharacterized protein
GRMZM2G048324	cluster2	4.46173	15.0898	14.275	42.1322	49.2941	63.7185	nrx1	Uncharacterized protein
GRMZM2G423617	cluster2	1.64156	5.28845	26.9808	38.7468	40.2055	33.8201	GRMZM2G423617	Uncharacterized protein
AC234526.1_FG005	cluster2	0.304906	0.965902	2.01571	2.62324	4.20785	4.55947	NA	NA
GRMZM2G158009	cluster2	0.581254	1.63112	2.21762	3.91005	4.97664	6.42841	NA	Uncharacterized protein
GRMZM2G090568	cluster2	0.968136	2.64398	15.0572	43.2711	12.9566	40.3193	cat2	Catalase isozyme 2
GRMZM2G132509	cluster2	12.031	32.2777	132.394	120.717	174.34	146.416	NA	Uncharacterized protein
GRMZM2G702806	cluster2	0.4878	1.28504	1.33272	1.65029	1.63775	1.55187	NA	Uncharacterized protein
GRMZM2G083382	cluster2	2.69546	6.87468	15.4556	14.7908	17.8775	15.8235	NA	NA
GRMZM5G862663	cluster2	0.700655	1.86752	2.11848	2.1232	2.53162	2.99791	atpc1	NA
GRMZM2G383093	cluster2	0.484641	1.20763	1.4706	2.95679	2.73934	3.44225	NA	Uncharacterized protein
AC194965.4_FG004	cluster2	1.53781	3.81823	2.62929	6.07028	4.40705	6.4628	gata12	Uncharacterized protein
GRMZM2G063258	cluster2	0.461658	1.17456	1.42487	2.2803	1.49182	1.73662	NA	Uncharacterized protein
GRMZM2G178079	cluster2	7.44355	18.6421	18.8127	25.6807	23.0577	21.762	gst37	Glutathione S-transferase GSTU6
GRMZM2G123866	cluster2	0.459968	1.13842	0.999944	2.98163	2.2511	3.23533	NA	NA
GRMZM2G137869	cluster2	1.38427	3.50576	3.45491	3.60077	4.82009	3.57385	ofp37	Plant-specific domain TIGR01568 family; Plant-specific domain TIGR01568 family protein; Uncharacterized protein
GRMZM2G038636	cluster2	21.373	52.7942	94.4438	99.0524	59.2028	140.214	ccp2	Cysteine proteinase 2
GRMZM2G062724	cluster2	0.833128	2.01497	7.60615	10.2243	15.6651	16.3633	NA	Uncharacterized protein
GRMZM2G077914	cluster2	0.258254	0.597208	0.703479	1.47909	2.22158	2.31376	NA	Uncharacterized protein
GRMZM2G570790	cluster2	0.325575	0.805422	0.439322	0.79314	0.58954	0.873426	NA	Uncharacterized protein
GRMZM2G141473	cluster2	18.7718	45.1101	69.7805	138.652	136.788	167.425	ao4	NA
GRMZM2G056988	cluster2	0.126715	0.307326	0.323875	0.438856	0.497053	0.483271	NA	Putative uncharacterized protein
GRMZM2G146308	cluster2	5.30455	12.6924	25.0055	37.0276	27.6326	35.4078	NA	Glycine-rich protein GRP5; Uncharacterized protein
GRMZM2G023049	cluster2	1.16047	2.81816	3.84704	3.45139	4.51433	5.17766	NA	NA
GRMZM2G024024	cluster2	2.97805	7.02358	6.54541	11.8713	23.903	16.5623	NA	Protein kinase
GRMZM5G862109	cluster2	5.51611	13.0332	33.671	41.7704	38.1112	38.1527	ts6	Indeterminate spikelet 1
GRMZM2G335618	cluster2	40.1304	94.4624	66.9805	122.47	100.118	93.0896	gst19	Glutathione S-transferase GST 19; Uncharacterized protein
GRMZM2G058261	cluster2	2.87623	6.77297	5.02382	9.90145	5.31969	11.3067	NA	Deoxyribodipyrimidine photolyase
GRMZM2G058484	cluster2	1.69139	3.92689	4.00218	5.32885	6.17172	5.31627	NA	Uncharacterized protein
GRMZM2G416836	cluster2	0.845722	1.95999	1.8656	2.96225	3.75052	3.66974	trps14	Putative trehalose phosphatase/synthase family protein
GRMZM2G166245	cluster2	1.08481	2.53315	2.38627	3.65624	3.35458	2.7244	NA	Uncharacterized protein
GRMZM2G167794	cluster2	2.59657	5.9996	16.6192	35.419	35.6293	43.4682	iaa11	Uncharacterized protein
GRMZM2G040033	cluster2	0.777222	1.81852	3.45473	6.07497	7.1002	6.93553	NA	Organic anion transporter; Uncharacterized protein
GRMZM2G091191	cluster2	4.24731	9.58498	43.8284	86.3452	150.345	148.371	NA	NA
GRMZM2G038898	cluster2	3.86032	8.64364	9.31295	10.7175	8.01758	13.4546	NA	Uncharacterized protein
GRMZM2G180951	cluster2	0.311823	0.697667	5.06866	10.4563	15.8314	15.7884	NA	Uncharacterized protein
GRMZM2G064875	cluster2	3.63208	8.24519	34.4322	51.1964	90.2388	81.4182	NA	Actin-depolymerizing factor
GRMZM2G143352	cluster2	0.768856	1.73476	1.59599	4.11878	5.16544	5.80841	iaa44	Uncharacterized protein
GRMZM2G105005	cluster2	16.5133	36.5467	35.9254	57.278	64.2586	62.1958	umc1149	Glutathione S-transferase;-like protein; Uncharacterized protein
GRMZM2G464782	cluster2	5.57026	12.269	9.42993	17.7291	18.7545	18.7958	NA	Putative uncharacterized protein
GRMZM2G146380	cluster2	7.25028	15.8028	14.1976	22.1074	32.305	22.7836	nactf30	NAC30 NAC type transcription factor
GRMZM2G138268	cluster2	11.9515	25.8789	49.3443	61.026	55.6726	51.5349	iaa10	Uncharacterized protein
GRMZM2G428905	cluster2	2.71711	5.86603	5.22239	7.55778	6.11449	8.6184	NA	NA
GRMZM2G122057	cluster2	1.27978	2.76705	2.66368	3.72206	3.71164	4.39019	NA	Uncharacterized protein
GRMZM2G054465	cluster2	17.9219	38.0486	34.6442	75.9015	65.6131	100.772	NA	Uncharacterized protein
GRMZM2G000665	cluster2	1.28117	2.71535	2.65547	2.69428	2.68405	3.40249	NA	Uncharacterized protein
GRMZM2G392791	cluster2	6.14299	13.0057	17.0549	35.3218	26.568	56.5114	NA	Epoxide hydrolase 2; Uncharacterized protein
AC190526.3_FG004	cluster2	1.25248	2.61134	3.21575	4.61025	4.36757	4.52778	NA	NA
GRMZM2G098988	cluster2	3.47344	7.2877	15.7029	23.2508	21.2765	25.2212	NA	Putative HLH DNA-binding domain superfamily protein isoform 1; Putative HLH DNA-binding domain superfamily protein isoform 2; Putative HLH DNA-binding domain superfamily protein isoform 3; Uncharacterized protein
GRMZM2G115646	cluster2	13.5857	28.2802	23.153	41.9806	42.871	38.7172	NA	NA
GRMZM2G027272	cluster2	7.8759	16.3569	14.9601	16.5707	17.119	23.1328	NA	Nitrate-induced NOI protein; Uncharacterized protein
GRMZM2G097640	cluster2	1.52801	3.17785	4.39337	4.05463	3.87475	5.4294	lug4	NA
AC233960.1_FG002	cluster2	3.68511	7.55101	8.07028	12.1624	9.64407	13.7246	aox1	Alternative oxidase
GRMZM2G077215	cluster2	7.7864	16.0891	12.6709	19.5739	15.9024	21.1225	NA	Uncharacterized protein
GRMZM2G178917	cluster2	0.637059	1.32423	2.32081	2.48458	1.12042	5.24552	NA	Cyclopropane fatty acid synthase
GRMZM2G100719	cluster2	2.16835	4.47177	3.41982	5.83075	4.35096	4.15942	NA	Uncharacterized protein
GRMZM2G027663	cluster2	0.811917	1.67894	1.44674	3.7709	3.75641	5.07408	thic1	Uncharacterized protein
GRMZM2G324863	cluster2	2.52637	5.05471	4.91742	5.71241	5.20771	6.2346	NA	Uncharacterized protein
GRMZM2G130432	cluster2	2.39932	4.77985	5.57629	4.68824	6.62385	6.29338	NA	Uncharacterized protein
GRMZM2G443903	cluster2	0.703475	1.42585	1.24364	1.59955	1.9032	1.82132	NA	Uncharacterized protein
GRMZM2G367834	cluster2	1.85337	0.890495	2.97759	15.32	6.7576	21.8681	NA	NA
GRMZM2G107101	cluster2	32.4253	15.2775	25.5618	45.0848	20.2964	59.1934	gi1	Gigantea 1A; Gigantea isoform 1; Gigantea isoform 2
GRMZM2G011314	cluster2	7.43214	3.45634	7.49103	6.72539	7.05206	7.98082	NA	Uncharacterized protein
GRMZM2G393334	cluster2	12.8042	24.1594	25.6146	30.106	32.2652	36.957	bm4	Folylpolyglutamate synthase
GRMZM2G363038	cluster2	8.35861	10.5011	16.7533	20.6082	21.6552	25.6584	NA	Uncharacterized protein
GRMZM2G360835	cluster2	2.03377	2.72752	4.1105	4.55135	4.37935	5.23534	NA	Uncharacterized protein
GRMZM2G079477	cluster2	4.60385	7.73535	9.20209	8.73087	12.1353	14.5916	NA	Uncharacterized protein
GRMZM2G007957	cluster2	4.42634	5.28978	8.87274	9.48766	11.2943	12.9888	NA	Dehydrodolichyl diphosphate synthase 6 isoform 1; Dehydrodolichyl diphosphate synthase 6 isoform 2; Uncharacterized protein
GRMZM2G316967	cluster2	8.72947	10.4622	17.5726	27.0437	26.6365	38.5225	tpl1	NA
GRMZM2G058289	cluster2	14.8268	12.2952	29.833	45.4944	57.3332	62.9749	NA	NA
GRMZM2G145758	cluster2	7.23018	18.4607	14.5995	17.3025	20.0194	21.809	rpl32	Histone H3
GRMZM2G462613	cluster2	8.66049	13.8748	17.5022	19.2835	18.5549	18.9644	NA	NA
GRMZM2G150264	cluster2	1.6877	2.30347	3.4249	4.29326	4.50428	5.37572	NA	Galactosylgalactosylxylosylprotein 3-beta-glucuronosyltransferase 1; Uncharacterized protein
GRMZM2G106235	cluster2	3.08768	4.42514	6.1804	5.34684	6.72967	6.9642	NA	Uncharacterized protein
GRMZM2G171807	cluster2	1.11687	1.59842	2.24415	1.6083	2.63104	2.79159	NA	Putative WAK receptor-like protein kinase family protein; Uncharacterized protein
GRMZM2G129354	cluster2	27.6825	34.6505	56.0441	60.4702	72.9971	89.4845	NA	ARF GAP-like zinc finger-containing protein ZIGA3
GRMZM2G340456	cluster2	1.63814	2.44404	3.35363	3.82386	3.85881	3.7509	NA	NA
GRMZM2G097504	cluster2	3.3988	4.14635	6.91671	13.8348	15.5354	17.1259	NA	Uncharacterized protein
GRMZM2G067747	cluster2	13.1755	17.7574	26.8999	31.6774	34.808	32.8997	NA	Sodium/hydrogen exchanger
GRMZM5G887286	cluster2	9.19418	11.6234	18.8275	18.3577	18.5435	21.4999	NA	Zinc finger protein 511
GRMZM2G472428	cluster2	6.68257	9.2572	13.6364	19.4537	21.1256	21.6857	phm229	Uncharacterized protein
GRMZM2G124377	cluster2	4.00027	5.14662	8.18051	11.6503	12.2687	12.1137	NA	NA
GRMZM2G436511	cluster2	2.00337	2.31874	4.06002	4.67542	4.22195	4.8684	NA	Uncharacterized protein
GRMZM5G800925	cluster2	13.8692	17.6906	28.4746	36.9104	40.0607	40.1961	NA	Uncharacterized protein
AC211401.4_FG003	cluster2	5.10873	8.21732	10.4755	11.4978	10.8795	11.3394	NA	Uncharacterized protein
GRMZM5G811948	cluster2	2.57755	3.64291	5.37341	6.9546	6.69636	6.53301	NA	NA
GRMZM2G174738	cluster2	17.7178	25.0418	36.5012	42.1505	41.6653	43.8475	gpm46	Uncharacterized protein
GRMZM2G125294	cluster2	7.1514	11.1755	14.736	19.1386	20.5897	21.4953	hb29	Putative homeodomain-like transcription factor superfamily protein
GRMZM2G118047	cluster2	11.2613	15.143	23.3163	55.7901	48.8108	64.4971	hsftf28	HSF28 HSF type transcription factor
GRMZM2G014955	cluster2	3.36643	4.67882	6.92485	6.65958	7.32268	8.2225	NA	Protein-O-fucosyltransferase 1
GRMZM2G137366	cluster2	4.03204	6.56355	8.39152	9.15314	9.1964	9.55839	met7	Uncharacterized protein
GRMZM2G010804	cluster2	1.34759	1.39366	2.7593	2.63325	2.95816	4.06044	NA	Uncharacterized protein
GRMZM2G127729	cluster2	12.561	16.7015	26.1144	32.5409	30.6623	33.4773	NA	NA
GRMZM2G044092	cluster2	6.85994	10.9049	14.2204	19.097	19.1059	20.4486	NA	Uncharacterized protein
GRMZM2G153984	cluster2	19.4525	32.7292	40.4889	41.1785	44.2505	50.0167	NA	2-hydroxy-3-oxopropionate reductase
GRMZM5G828630	cluster2	16.67	14.3258	34.907	165.188	221.728	274.281	NA	NA
GRMZM2G113351	cluster2	3.33144	4.13307	6.98937	10.4538	11.0981	10.4638	NA	Uncharacterized protein
GRMZM2G102502	cluster2	7.29764	16.0155	15.207	20.739	22.6701	21.7563	NA	Peroxisomal biogenesis factor 19
GRMZM2G310155	cluster2	1.4456	1.95676	3.03974	3.60613	3.35994	4.41758	NA	Uncharacterized protein
GRMZM2G014813	cluster2	1.62979	2.89954	3.44334	6.02558	4.93159	4.81672	NA	3-hydroxyisobutyrate dehydrogenase
GRMZM5G832248	cluster2	7.69752	13.5983	16.1743	16.5936	17.548	17.5806	NA	Uncharacterized protein
GRMZM2G123537	cluster2	5.91807	10.6017	12.4272	19.9318	21.6694	23.0561	NA	Uncharacterized protein
GRMZM5G812926	cluster2	10.8789	12.7774	22.8291	37.9848	46.0229	50.4954	NA	Uncharacterized protein
GRMZM2G480620	cluster2	1.83742	3.08018	3.87051	5.98045	6.28992	6.6681	NA	NA
GRMZM2G098784	cluster2	6.64027	8.51574	14.0371	19.3354	19.9913	21.7587	gras1	Uncharacterized protein
GRMZM2G167207	cluster2	7.04173	9.5322	14.8551	17.1302	17.3998	22.0139	bsdtf9	BSD domain containing protein; Uncharacterized protein
GRMZM2G146292	cluster2	2.37787	3.55895	5.03785	9.15825	9.473	9.8509	NA	Uncharacterized protein
GRMZM2G079236	cluster2	14.0052	18.3354	29.5293	32.4919	36.1083	35.0224	NA	Acyl-CoA synthetase long-chain family member 3
GRMZM2G080565	cluster2	4.41277	4.90119	9.3217	8.5628	8.86958	10.249	NA	Uncharacterized protein
GRMZM2G020544	cluster2	22.5137	42.612	47.489	45.2452	53.8067	51.1437	NA	Ras-related protein Rab11C; Uncharacterized protein
GRMZM2G065970	cluster2	0.651092	1.84094	1.39881	2.72229	2.47053	2.98667	NA	NA
GRMZM2G139822	cluster2	19.4017	27.6638	41.0663	42.7999	48.6678	54.7585	mgt9	NA
GRMZM2G068789	cluster2	1.78577	2.82323	3.78427	3.11169	3.38	4.45516	NA	Phospholipase A2; group IVB isoform 6
GRMZM2G148940	cluster2	1.65395	2.56924	3.52418	5.44908	5.71855	6.21462	farl14	FAR1-domain family sequence
GRMZM2G055960	cluster2	4.62159	6.01046	9.84322	12.0815	12.3494	13.8552	NA	Uncharacterized protein
GRMZM5G873964	cluster2	5.11857	9.50515	10.9799	11.5748	11.1807	13.484	NA	NA
GRMZM2G114459	cluster2	3.85875	5.65261	8.25481	12.5288	12.2896	11.6171	polm1	NA
GRMZM2G368410	cluster2	0.953412	1.75507	2.04579	3.94974	3.98329	4.91784	NA	Uncharacterized protein
GRMZM2G034690	cluster2	2.86514	4.19233	6.1229	9.05492	7.1904	6.7924	NA	Uncharacterized protein
GRMZM2G122935	cluster2	6.8601	11.95	14.6967	12.1884	16.8681	19.8036	NA	Uncharacterized protein
GRMZM2G402804	cluster2	1.46862	2.52313	3.19717	3.49128	3.59779	4.59565	NA	Uncharacterized protein
GRMZM2G138425	cluster2	3.69134	5.30649	7.89885	11.9583	12.3239	14.8775	NA	Uncharacterized protein
GRMZM2G089056	cluster2	1.39532	1.32768	2.99775	3.28847	3.67988	4.58805	php20537b	NA
GRMZM2G084181	cluster2	23.0875	43.746	49.4931	88.9477	81.7718	90.0335	NA	NA
GRMZM2G474798	cluster2	3.39773	5.42805	7.30273	9.8862	9.63747	9.91508	NA	NA
GRMZM2G443525	cluster2	19.4457	28.5586	41.6834	58.1876	52.1086	69.2975	AI855190	NA
GRMZM2G025649	cluster2	2.13306	1.50838	4.45199	5.88411	5.51405	5.84036	NA	NA
GRMZM2G179317	cluster2	3.92653	6.3975	8.48187	8.64271	9.14239	9.75624	NA	NA
GRMZM2G106903	cluster2	4.99514	6.51587	10.7257	11.0663	11.4674	14.7867	GRMZM2G106903	NA
GRMZM2G171373	cluster2	3.72958	12.5686	8.04203	12.022	13.17	12.9481	hex6	Uncharacterized protein
GRMZM2G416625	cluster2	2.08343	1.751	4.44415	7.02653	7.10943	7.82123	NA	NA
AC233885.1_FG001	cluster2	5.63978	7.56007	12.156	13.3948	15.7908	13.3645	NA	Putative uncharacterized protein
GRMZM2G133169	cluster2	7.01517	6.89491	15.1324	17.8517	16.5673	25.8492	gras65	NA
GRMZM2G372475	cluster2	1.98876	3.86862	4.31504	5.67034	5.47515	7.09248	NA	Lipid binding protein
GRMZM2G135763	cluster2	5.05538	5.83362	10.9681	15.6276	19.6043	17.3513	NA	NA
GRMZM2G057768	cluster2	1.6912	2.93299	3.65832	5.03418	3.56662	5.14845	NA	Ca2+/calmodulin-dependent protein kinase phosphatase
GRMZM2G085467	cluster2	5.95993	8.17542	12.9383	22.6664	18.9937	22.5415	bhlh146	Helix-loop-helix DNA-binding domain containing protein
GRMZM5G843213	cluster2	5.92437	7.34106	12.9473	10.2672	16.3092	14.4086	NA	Uncharacterized protein
GRMZM2G353091	cluster2	0.795552	1.06062	1.76088	1.54649	1.6909	1.85283	NA	NA
AC194965.4_FG001	cluster2	1.91479	2.12199	4.21086	5.33347	6.47499	5.7621	NA	Uncharacterized protein
GRMZM5G863229	cluster2	2.82192	4.14489	6.13587	6.5386	7.19137	7.6875	NA	Uncharacterized protein
GRMZM2G038301	cluster2	2.41816	3.96557	5.3087	5.32535	5.20718	8.9998	ccs1	Uncharacterized protein
GRMZM2G411536	cluster2	8.50075	13.394	18.6627	26.4495	25.6522	25.0804	NA	NA
GRMZM2G080937	cluster2	11.3837	19.0449	25.0767	24.2349	29.1434	36.9292	NA	Uncharacterized protein
GRMZM2G154883	cluster2	3.53347	5.68046	7.79505	10.4445	11.1282	10.7541	NA	NA
GRMZM2G026442	cluster2	5.37076	6.95626	11.8482	12.5225	12.707	13.817	pza02479	Uncharacterized protein
GRMZM5G835772	cluster2	3.71316	7.15252	8.16238	9.39828	10.5209	10.0971	NA	Uncharacterized protein
GRMZM2G092661	cluster2	3.96296	6.53557	8.78749	11.6422	11.9982	12.0253	NA	NA
GRMZM2G412846	cluster2	1.72939	4.31648	3.8325	5.45177	8.37761	6.63338	NA	NA
GRMZM2G042313	cluster2	7.93887	12.3747	17.5787	38.11	37.1757	61.5308	NA	NA
AC212835.3_FG007	cluster2	12.1397	20.9146	26.8491	31.324	36.4434	42.6449	NA	Uncharacterized protein
GRMZM2G165535	cluster2	24.9327	57.9985	55.323	68.5695	79.0928	71.8632	NA	Uncharacterized protein
GRMZM2G111152	cluster2	3.52069	4.48787	7.78071	10.3279	7.32237	10.8016	NA	Uncharacterized protein
GRMZM2G059753	cluster2	5.14636	9.09195	11.5262	9.59573	11.6271	15.761	NA	Putative uncharacterized protein
GRMZM2G139600	cluster2	0.985347	0.528259	2.19991	3.96673	3.95703	4.53584	NA	Uncharacterized protein
GRMZM2G048987	cluster2	2.52139	4.16592	5.63845	8.72611	8.89257	8.37094	farl11	NA
GRMZM2G048281	cluster2	4.2554	4.34535	9.48108	13.9769	16.643	13.7491	NA	Uncharacterized protein
GRMZM2G003755	cluster2	1.56033	1.79542	3.48164	5.61456	7.25806	8.74105	NA	Uncharacterized protein
GRMZM2G018678	cluster2	1.79043	1.89995	4.0756	7.34137	4.26448	6.59534	NA	Uncharacterized protein
GRMZM2G050915	cluster2	2.00226	2.76337	4.51375	7.87822	10.7482	11.6504	NA	NA
GRMZM2G569855	cluster2	14.0583	21.2561	31.7054	38.6544	35.7618	40.2597	NA	NA
GRMZM2G039671	cluster2	2.41843	3.81046	5.44297	8.12422	8.41723	8.07191	NA	Uncharacterized protein
GRMZM2G176394	cluster2	7.54895	16.6906	17.0061	37.5199	58.8719	49.4546	NA	Uncharacterized protein
GRMZM2G137582	cluster2	4.23012	8.11022	9.54545	16.759	11.8539	13.4295	ebf1	EIN3-binding F-box protein 1
GRMZM2G079263	cluster2	9.87137	20.5763	22.2426	19	26.7561	29.5596	NA	Polygalacturonase; Uncharacterized protein
GRMZM2G055219	cluster2	2.30218	4.15547	5.19175	6.19427	6.80943	5.92732	NA	Uncharacterized protein
GRMZM2G056247	cluster2	7.34378	17.1514	16.6182	24.4835	23.642	27.3503	NA	Putative cytochrome P450 superfamily protein; Uncharacterized protein
GRMZM2G452142	cluster2	3.05519	2.93641	6.92748	10.7804	11.2095	14.8106	NA	Uncharacterized protein
GRMZM2G100497	cluster2	5.43192	7.80643	12.3445	13.4945	15.4027	16.703	NA	tRNA pseudouridine synthase
GRMZM2G055992	cluster2	4.60217	4.7559	10.495	14.3731	12.8028	13.0534	NA	Putative uncharacterized protein
GRMZM2G366659	cluster2	4.62667	6.49749	10.5483	15.5204	18.951	22.4936	trps9	Putative trehalose phosphatase/synthase family protein
GRMZM2G057176	cluster2	0.751093	0.793507	1.74255	2.94814	2.6527	3.2547	NA	NA
GRMZM2G001895	cluster2	4.54558	7.68131	10.4211	13.5716	13.6113	14.1065	NA	Uncharacterized protein
GRMZM2G041831	cluster2	2.64747	5.05469	6.05963	6.2203	6.8553	7.29693	NA	Uncharacterized protein
GRMZM2G007810	cluster2	4.42765	6.50831	10.1888	16.001	15.7046	17.7695	NA	Uncharacterized protein
GRMZM2G007675	cluster2	10.6289	21.4804	24.4632	28.7964	34.5012	35.5423	NA	Uncharacterized protein
GRMZM2G066485	cluster2	1.7222	2.67033	3.95456	3.55314	4.30079	4.83756	pld13	Phospholipase D family protein
GRMZM2G026223	cluster2	2.5349	4.70588	5.81587	5.11764	6.9427	8.46423	zag6	MADS-box transcription factor 56
GRMZM2G051179	cluster2	4.41626	5.05952	10.226	14.4773	13.7771	12.7529	NA	Uncharacterized protein
GRMZM2G033641	cluster2	9.15174	24.1053	21.1659	30.2155	31.2327	27.7613	NA	Putative patellin family protein; Uncharacterized protein
GRMZM2G162082	cluster2	0.364787	0.622878	0.815076	1.06939	0.909347	1.13943	NA	Uncharacterized protein
GRMZM2G111846	cluster2	11.1491	17.5749	25.852	25.4097	26.714	27.4846	NA	Uncharacterized protein
GRMZM2G053199	cluster2	4.61444	2.48723	10.6832	25.154	31.8065	36.9438	NA	Putative serine/threonine protein phosphatase superfamily protein
GRMZM2G403151	cluster2	0.997659	1.60266	2.3045	4.77958	6.38459	6.98102	NA	Uncharacterized protein
GRMZM2G178279	cluster2	0.796614	0.782982	1.82634	2.39167	1.83352	2.27295	NA	Putative inositol polyphosphate phosphatase (Synaptogenin-like) family protein
GRMZM2G134502	cluster2	0.430765	0.702284	0.983073	1.4784	1.43067	1.50359	NA	Fiber annexin; Uncharacterized protein
GRMZM2G438007	cluster2	0.727436	1.1618	1.68724	2.92773	2.66245	2.59076	brl3	Putative leucine-rich repeat receptor-like protein kinase family protein
GRMZM2G168474	cluster2	6.83194	8.45171	16.0001	35.5333	46.7594	55.2715	czog1	Cis-zeatin O-glucosyltransferase 1
GRMZM2G564586	cluster2	0.44677	0.687366	1.04215	1.52338	1.67466	1.86907	NA	NA
GRMZM2G480074	cluster2	1.25009	1.15309	2.96797	3.78468	4.63776	4.2633	NA	Uncharacterized protein
GRMZM2G143211	cluster2	6.31204	9.3454	14.9584	16.882	17.2695	20.4762	atg18d	Uncharacterized protein
GRMZM2G087955	cluster2	2.75303	6.57953	6.53467	11.1266	6.12689	9.31385	myb139	Uncharacterized protein
GRMZM2G098298	cluster2	67.3347	93.3938	160.063	227.921	130.055	227.977	ccp1	Cysteine proteinase 1
AC233945.1_FG003	cluster2	6.58312	9.60974	15.6108	19.9941	22.2533	25.571	NA	Transparent testa 12 protein
GRMZM2G428035	cluster2	2.339	3.54366	5.57051	8.65862	10.9237	9.2257	NA	Uncharacterized protein
GRMZM2G049159	cluster2	7.31616	9.48979	17.5328	18.091	20.7802	27.0711	gras67	Uncharacterized protein
GRMZM2G474119	cluster2	44.6733	80.5298	106.722	168.51	159.451	187.316	NA	Uncharacterized protein
GRMZM2G008226	cluster2	5.70164	9.45809	13.6584	19.1146	20.3683	19.7248	trps4	NA
GRMZM2G399644	cluster2	3.02712	4.24745	7.17659	15.3486	16.8194	18.0758	NA	NA
GRMZM2G028036	cluster2	2.40647	3.59568	5.75688	7.81332	11.0307	12.8685	NA	Uncharacterized protein
GRMZM2G026922	cluster2	2.34708	1.83817	5.66425	7.94006	5.45159	6.5515	NA	Uncharacterized protein
GRMZM2G467799	cluster2	11.1079	19.0889	26.7125	43.9519	43.7648	40.5936	syd1	Uncharacterized protein
GRMZM2G095598	cluster2	4.17587	6.35413	10.005	13.6846	17.1449	15.81	col11	NA
GRMZM2G082191	cluster2	3.64017	5.16233	8.76829	16.0036	20.1307	21.0786	NA	NA
GRMZM2G056645	cluster2	4.29208	7.26413	10.3437	13.478	13.4675	12.3715	NA	Uncharacterized protein
GRMZM2G104325	cluster2	18.6703	31.8665	45.059	60.2218	63.5155	97.7912	mha3	Uncharacterized protein
GRMZM2G082916	cluster2	3.23375	5.54904	7.78801	12.0366	11.8856	14.1891	NA	NA
GRMZM2G031568	cluster2	2.34309	4.63278	5.64871	10.2897	6.3248	11.5289	AY110297	NA
GRMZM2G063069	cluster2	34.0405	63.1863	82.576	82.724	83.8081	119.206	NA	ATP binding protein; Uncharacterized protein
GRMZM2G037627	cluster2	3.62362	5.2089	8.71926	8.07182	7.54024	10.5649	NA	RING-H2 finger protein ATL5F
GRMZM2G050435	cluster2	3.86029	8.97228	9.41671	11.0031	10.9403	14.3294	NA	NA
GRMZM2G321153	cluster2	0.992827	2.23455	2.40646	3.69966	4.6972	4.11562	NA	Uncharacterized protein
GRMZM5G840538	cluster2	0.779165	1.02993	1.93976	1.67156	1.66022	2.79307	NA	NA
GRMZM2G141873	cluster2	5.12966	9.87136	12.5811	15.0623	14.1372	14.2931	NA	Uncharacterized protein
GRMZM2G321033	cluster2	0.272959	0.567991	0.689472	1.57288	1.57739	1.95322	NA	NA
GRMZM2G134396	cluster2	32.2399	52.6916	79.2562	67.7173	75.1801	88.8479	NA	Uncharacterized protein
GRMZM2G118022	cluster2	2.1824	3.92139	5.3887	6.85532	6.16857	5.78845	NA	Uncharacterized protein
GRMZM2G406746	cluster2	0.768045	0.954025	1.86568	2.87597	2.63315	2.98723	NA	NA
GRMZM2G302604	cluster2	6.42832	25.9212	15.9114	54.0899	39.5953	62.8492	NA	Uncharacterized protein
AC152495.1_FG017	cluster2	0.30733	0.392567	0.744402	1.16766	1.35612	1.33936	NA	Uncharacterized protein
GRMZM2G384439	cluster2	13.9919	19.9225	35.0126	42.792	55.4073	56.6017	NA	Putative leucine-rich repeat receptor-like protein kinase family protein
GRMZM2G420801	cluster2	6.30326	10.6385	15.9396	17.2525	18.5937	22.6863	etr2	Ethylene receptor; Ethylene receptor homologue; Ethylene receptor-like protein
GRMZM2G020081	cluster2	2.06696	3.16592	5.23097	6.61147	6.12533	9.23142	NA	PseudoARR-B transcription factor; Two-component response regulator-like PRR1
GRMZM2G144890	cluster2	3.70741	7.59544	9.41062	11.6847	10.3823	12.5138	NA	Uncharacterized protein
GRMZM2G328988	cluster2	3.43424	5.74048	8.74555	14.1427	13.2291	15.1151	NA	Uncharacterized protein
GRMZM2G356178	cluster2	1.29058	1.74866	3.27918	4.50717	3.3154	4.40156	NA	NA
GRMZM2G073567	cluster2	35.7075	43.9216	90.8396	51.8303	50.5443	120.748	NA	Uncharacterized protein
GRMZM5G823004	cluster2	12.9667	18.053	32.9793	44.8565	40.5158	47.7337	NA	Uncharacterized protein
GRMZM2G057243	cluster2	4.43464	8.2475	11.3243	15.7665	13.3856	18.2858	wc1	9;10-9;10 carotenoid cleavage dioxygenase 1; Uncharacterized protein; White cap1
GRMZM2G125943	cluster2	0.997316	1.89209	2.55295	4.27509	3.71168	3.68034	hk6	Putative histidine kinase family protein
GRMZM2G100524	cluster2	1.10438	0.997018	2.8064	4.0548	6.23458	4.84838	NA	Uncharacterized protein
GRMZM2G098088	cluster2	10.0212	9.21167	26.1338	21.6115	26.7846	32.1922	NA	NA
GRMZM2G053047	cluster2	1.64345	3.14984	4.29195	4.9938	5.8739	4.60871	NA	NA
GRMZM2G469414	cluster2	0.52303	0.734423	1.37051	1.94241	2.66144	2.00451	NA	NA
GRMZM2G414002	cluster2	3.24888	4.46424	8.52121	12.2912	14.3075	16.244	NA	NA
GRMZM5G800723	cluster2	3.10082	2.37326	8.28308	14.2349	18.1904	18.6172	NA	NA
GRMZM2G108416	cluster2	5.01598	12.7543	13.1202	15.3598	15.3739	15.7335	NA	Aminotransferase; class IV family protein
GRMZM2G030263	cluster2	0.602323	0.751296	1.59222	2.68205	2.62479	3.29832	NA	NA
GRMZM2G034410	cluster2	2.98947	4.04503	7.89601	9.55943	11.1872	12.5819	NA	Uncharacterized protein
GRMZM2G022947	cluster2	1.13976	1.77876	3.02249	3.39239	3.2967	4.19069	NA	Cytochrome P450 CYP727A4
GRMZM2G036918	cluster2	3.48254	5.32248	9.23365	10.9269	10.1091	9.21422	NA	Uncharacterized protein
GRMZM2G165567	cluster2	15.1645	27.267	40.0806	40.5244	36.6867	56.4847	NA	Uncharacterized protein
GRMZM2G140633	cluster2	12.011	14.5556	31.9766	34.6716	47.5285	47.9821	asc1	Cyclin delta-2
GRMZM2G455476	cluster2	2.55481	4.97077	6.8223	8.62583	11.7346	10.1027	NA	Uncharacterized protein
GRMZM2G024992	cluster2	1.23	2.21289	3.31404	5.2922	4.84024	4.41087	NA	Uncharacterized protein
GRMZM2G039254	cluster2	6.04378	10.6348	16.284	18.3573	16.6107	18.1647	NA	NA
GRMZM2G054050	cluster2	1.99363	2.19395	5.35298	9.0703	2.59581	12.0561	pza02427	Uncharacterized protein
GRMZM2G164956	cluster2	41.5901	51.4873	111.987	124.693	130.988	145.327	NA	Uncharacterized protein
GRMZM2G149184	cluster2	1.10941	0.904189	2.98333	3.47387	3.98976	2.62127	pin3	Putative auxin efflux carrier
GRMZM2G052339	cluster2	0.965247	1.36245	2.56005	3.00961	2.71738	3.39229	NA	Putative pentatricopeptide repeat family protein
GRMZM2G038669	cluster2	0.87368	1.9412	2.35466	1.97018	1.60864	3.50275	NA	NA
GRMZM2G448282	cluster2	2.15755	3.72208	5.85965	7.33294	8.95906	11.3386	NA	Uncharacterized protein
GRMZM2G032694	cluster2	10.3316	15.6044	28.2786	30.2278	36.4504	35.6252	NA	Uncharacterized protein
GRMZM2G035401	cluster2	0.601679	1.09666	1.64806	2.13167	1.44094	2.25921	NA	Uncharacterized protein
GRMZM2G160005	cluster2	2.42083	2.16044	6.6194	13.8579	19.1059	21.1437	arftf27	Auxin response factor 27; Uncharacterized protein
GRMZM2G080079	cluster2	0.398591	0.456329	1.08125	1.56647	2.5248	2.32525	gol1	Goliath1; RING-H2 finger protein ATL1Q; Uncharacterized protein
GRMZM2G005013	cluster2	0.793105	1.28109	2.23533	3.61644	3.71683	5.35128	NA	Uncharacterized protein
GRMZM2G158261	cluster2	5.88323	6.79059	16.2851	28.7708	30.8403	30.1125	AY110640	RNA binding protein
GRMZM2G426802	cluster2	2.27414	3.88164	6.25975	12.7186	18.1105	18.8473	NA	Signal transducer
GRMZM2G045294	cluster2	2.08734	8.99924	5.73412	7.18265	8.0205	7.96847	NA	Uncharacterized protein
GRMZM2G021607	cluster2	2.66292	5.31157	7.38772	9.37804	12.956	12.7588	NA	DNA binding protein; Uncharacterized protein
GRMZM2G095868	cluster2	2.27147	3.45059	6.30937	12.4632	14.611	14.2857	NA	Uncharacterized protein
GRMZM2G021303	cluster2	0.474037	0.662176	1.32705	1.95332	1.711	1.49879	NA	Uncharacterized protein
GRMZM2G139374	cluster2	6.7105	10.4146	18.7493	30.4268	26.1191	31.7715	NA	Uncharacterized protein
GRMZM2G036086	cluster2	5.10725	13.998	14.3685	17.82	15.6479	17.6336	NA	Peroxisomal biogenesis factor 11 family protein
GRMZM2G401869	cluster2	3.18199	5.84125	9.02845	10.62	11.3023	10.6984	NA	Uncharacterized protein
GRMZM2G107499	cluster2	7.31989	14.3489	20.8089	31.3231	19.7748	30.8891	NA	Uncharacterized protein
GRMZM2G362557	cluster2	3.82784	5.27185	10.9201	10.2575	10.8747	12.3995	NA	Uncharacterized protein
GRMZM2G392345	cluster2	0.434922	0.444399	1.2374	2.23025	2.43783	2.54184	NA	Putative uncharacterized protein
GRMZM2G428168	cluster2	47.5232	161.976	135.665	159.667	173.939	203.457	gst21	Glutathione S-transferase; Uncharacterized protein
GRMZM5G860235	cluster2	0.955749	0.609965	2.77583	4.59994	5.3995	5.92313	NA	Beta-hexosaminidase
GRMZM2G149681	cluster2	0.666599	0.628553	1.93109	3.90992	3.57469	4.06707	NA	Methyltransferase small domain
GRMZM2G144275	cluster2	5.94065	9.08646	17.2394	47.6401	53.0278	76.533	bhlh136	Uncharacterized protein
GRMZM2G305822	cluster2	3.89601	6.24849	11.2647	9.63663	13.5757	12.7888	pza01791	Putative U-box domain protein kinase family
GRMZM2G303244	cluster2	2.86113	2.85542	8.25879	6.87339	5.50207	11.4712	NA	Uncharacterized protein
GRMZM2G546834	cluster2	0.536553	0.960035	1.57124	3.64921	2.52698	3.74368	NA	NA
GRMZM2G344205	cluster2	7.39942	11.3808	21.5313	26.3588	34.2751	45.3935	NA	Uncharacterized protein
GRMZM2G104468	cluster2	1.5311	2.88734	4.51397	6.41088	6.82837	9.18736	NA	Uncharacterized protein
GRMZM2G115772	cluster2	0.503958	1.09718	1.46935	2.41213	1.89713	2.04644	NA	NA
GRMZM2G050556	cluster2	0.356559	0.36727	1.0704	1.53074	1.01746	1.36513	NA	Clathrin assembly protein
AC203966.5_FG005	cluster2	4.21729	3.84548	12.3783	21.5019	12.7012	17.1348	ga20ox1	Gibberellin 20 oxidase 1; Uncharacterized protein
GRMZM2G160417	cluster2	17.9092	18.1543	53.4254	63.5459	60.1385	68.353	NA	3-ketoacyl-CoA synthase
GRMZM2G398288	cluster2	3.06576	5.59808	9.17283	11.7216	12.31	14.0262	NA	Uncharacterized protein
GRMZM2G339645	cluster2	1.03653	1.68649	3.10632	8.42712	12.0457	14.0301	NA	CSLF3-cellulose synthase-like family F; beta1;3;1;4 glucan synthase; Uncharacterized protein
GRMZM2G142664	cluster2	0.770607	1.43327	2.35792	4.12235	4.65929	4.23045	NA	Auxin-independent growth promoter; Uncharacterized protein
GRMZM2G118062	cluster2	1.88441	1.58809	5.76589	17.2647	17.6235	23.0795	NA	NA
GRMZM2G425719	cluster2	0.924809	2.06421	2.86018	5.47826	4.54663	5.39374	NA	Uncharacterized protein
GRMZM2G394973	cluster2	2.31349	3.26249	7.19574	8.27235	15.6738	9.83397	dof37	NA
GRMZM2G154119	cluster2	1.53437	1.85707	4.7449	6.3856	5.05269	5.23697	NA	NA
GRMZM2G073931	cluster2	0.610328	0.776188	1.86177	1.66616	2.0034	1.92903	NA	NA
GRMZM2G319435	cluster2	1.03507	1.8838	3.24598	3.18736	4.28128	3.61677	NA	Uncharacterized protein
GRMZM2G159193	cluster2	4.34807	4.21254	13.6836	15.9571	27.5336	28.2407	NA	Uncharacterized protein
GRMZM2G174136	cluster2	1.95277	3.19291	6.18275	10.9308	12.4922	17.6964	NA	Putative uncharacterized protein
GRMZM2G099328	cluster2	1.53352	3.31232	4.85352	13.8059	21.8176	21.9683	limtf4	Zinc ion binding protein
GRMZM2G080696	cluster2	0.319684	0.251286	1.00766	1.81286	2.34928	2.63713	NA	Uncharacterized protein
GRMZM2G128922	cluster2	0.601885	0.568211	1.86888	2.31364	2.65516	3.25279	NA	Uncharacterized protein
GRMZM5G846196	cluster2	6.11238	9.2836	19.613	25.2157	31.3441	34.8577	NA	Putative vesicle-associated membrane protein family protein; Uncharacterized protein
GRMZM2G007587	cluster2	4.05716	5.96417	13.0702	33.7977	30.2012	39.4133	NA	Kelch motif family protein isoform 1; Kelch motif family protein isoform 2; Uncharacterized protein
GRMZM2G009335	cluster2	19.7066	35.4767	63.6969	102.663	102.119	118.988	NA	Uncharacterized protein
GRMZM2G092672	cluster2	0.266547	0.149159	0.859586	1.29263	1.00438	1.39092	NA	NA
GRMZM2G045236	cluster2	3.35782	5.90285	11.2468	20.7039	20.7861	22.463	bzip34	DNA binding protein; Putative bZIP transcription factor superfamily protein; Uncharacterized protein
GRMZM2G062848	cluster2	0.620322	0.801359	2.05596	2.93589	5.23732	5.12913	NA	Uncharacterized protein
GRMZM2G148702	cluster2	4.35675	4.84976	14.5929	17.3212	16.3629	16.5549	NA	Putative leucine-rich repeat receptor protein kinase family protein
GRMZM2G134980	cluster2	43.0641	31.249	145.395	311.112	342.681	363.954	rz474a(dnaj)	Uncharacterized protein
GRMZM2G102845	cluster2	5.94376	11.8593	20.205	21.6582	23.3679	19.8749	arftf20	Auxin response factor 20
GRMZM2G055827	cluster2	2.15416	2.80042	7.36066	10.5219	10.462	12.5012	NA	Putative RING zinc finger domain superfamily protein
GRMZM2G370193	cluster2	7.5926	16.4227	26.0124	20.277	29.0885	38.322	NA	Putative uncharacterized protein
GRMZM2G125320	cluster2	3.35845	4.90806	11.7377	12.2017	12.388	13.5346	NA	Uncharacterized protein
GRMZM5G848822	cluster2	0.185033	0.179602	0.663991	1.79631	2.94763	3.23392	NA	Uncharacterized protein
GRMZM2G127632	cluster2	2.67037	2.93918	9.49353	14.1822	17.8075	20.1387	NA	NA
GRMZM5G826321	cluster2	0.579079	0.785386	2.02631	2.63052	1.90475	2.52607	NA	Uncharacterized protein
GRMZM2G371033	cluster2	6.80568	14.2597	24.9264	35.6102	33.9293	41.8009	sbp18	Squamosa promoter-binding protein-like (SBP domain) transcription factor family protein
GRMZM2G083788	cluster2	3.45033	8.74247	12.7537	20.977	23.7654	22.6413	NA	NA
GRMZM2G029623	cluster2	0.560378	0.774989	2.04925	3.26915	3.51407	3.37146	xer4	RING-H2 finger protein ATL2I
GRMZM2G451147	cluster2	0.396325	0.746039	1.46098	1.70321	2.23105	2.35171	NA	Uncharacterized protein
GRMZM2G044818	cluster2	0.222944	0.21231	0.883253	1.6998	0.826042	1.87529	NA	Uncharacterized protein
GRMZM2G103847	cluster2	0.735432	1.12352	2.79317	3.02036	2.95534	3.01835	NA	Uncharacterized protein
GRMZM2G386674	cluster2	18.2638	57.5878	69.7256	94.6108	130.493	156.628	lbd33	Seed specific protein Bn15D17A
GRMZM2G001938	cluster2	10.5532	7.85327	40.2778	53.4592	62.9113	74.7305	NA	NA
GRMZM2G366434	cluster2	18.947	21.5148	72.3992	64.9068	79.7684	92.4781	BBM2	Protein BABY BOOM 2
GRMZM2G318527	cluster2	2.22534	4.22917	8.59259	14.414	21.5699	19.1998	NA	NA
GRMZM2G416484	cluster2	0.893306	2.68443	3.4466	8.41273	14.6565	13.396	NA	NA
GRMZM2G125544	cluster2	8.99361	22.2936	35.0087	36.4042	46.2005	54.4463	NA	Uncharacterized protein
GRMZM2G019974	cluster2	1.05202	2.20385	4.09351	8.69268	7.77034	11.6464	NA	Uncharacterized protein
GRMZM2G444138	cluster2	2.67861	7.92968	10.5955	19.0832	16.4921	17.433	NA	Putative uncharacterized protein
GRMZM2G041015	cluster2	1.27385	1.96061	4.94942	6.31441	6.69601	7.75777	phm3342	Uncharacterized protein
GRMZM2G041746	cluster2	4.52959	7.83175	18.3988	33.6758	41.1506	36.1769	nactf116	NAC domain-containing protein 76; Putative NAC domain transcription factor superfamily protein; Uncharacterized protein
GRMZM2G170646	cluster2	14.9796	25.5218	61.2283	78.1	95.1638	92.8237	NA	Esterase; Uncharacterized protein
GRMZM5G800211	cluster2	10.1336	8.66856	42.042	75.9568	81.4044	91.1758	NA	Uncharacterized protein
GRMZM2G479665	cluster2	3.61009	5.85015	15.0323	16.4924	20.0151	17.2387	NA	Uncharacterized protein
GRMZM2G069335	cluster2	1.12348	7.59246	4.7191	4.53298	6.40952	7.0521	NA	Uncharacterized protein
GRMZM2G073044	cluster2	11.9614	37.6335	50.6672	52.7044	82.8061	96.2429	lbd38	Seed specific protein Bn15D17A
GRMZM2G114778	cluster2	0.161869	0.60004	0.725733	2.20954	2.20013	2.85625	NA	Uncharacterized protein
GRMZM2G059214	cluster2	1.37316	2.62411	5.94719	8.05845	12.0403	10.3212	NA	Putative leucine-rich repeat receptor-like protein kinase family protein
GRMZM5G801953	cluster2	0.632363	0.190597	2.91854	6.03478	7.59629	7.92402	NA	Uncharacterized protein
GRMZM2G110368	cluster2	0.739675	1.55832	3.33767	2.40381	4.18581	5.70474	NA	Uncharacterized protein
GRMZM2G435276	cluster2	0.809274	0.584797	3.59035	5.06782	6.93876	5.41946	NA	NA
GRMZM2G054663	cluster2	0.50523	1.0001	2.19734	2.70066	2.58551	3.67286	NA	NA
GRMZM2G330945	cluster2	0.639631	0.734616	2.75204	3.27388	4.44795	5.44075	NA	Uncharacterized protein
AC205471.4_FG007	cluster2	56.3376	10.6546	253.67	239.802	298.484	346.634	NA	Uncharacterized protein
GRMZM2G050997	cluster2	2.38619	3.87679	10.8338	7.10851	11.7512	17.2056	cko2	Cytokinin oxidase 2
GRMZM2G040673	cluster2	8.6716	10.4034	39.8544	54.818	59.4247	59.8751	ofp41	Plant-specific domain TIGR01568 family protein
GRMZM5G869635	cluster2	0.190345	1.36196	0.935497	2.24185	2.54889	3.88372	NA	NA
GRMZM2G021243	cluster2	16.423	21.242	78.3088	132.681	152.056	141.767	NA	NA
GRMZM2G174249	cluster2	0.542257	1.66446	2.58807	6.37725	8.33813	8.37299	NA	Uncharacterized protein
GRMZM2G101270	cluster2	1.31678	2.39985	6.66895	10.5238	7.25361	7.69055	NA	Uncharacterized protein
GRMZM2G149442	cluster2	2.45176	4.71999	12.614	21.2409	22.3756	23.9538	NA	Uncharacterized protein
GRMZM2G111637	cluster2	0.694542	1.08007	3.4923	4.27488	4.70273	4.91332	NA	NA
GRMZM2G022679	cluster2	5.43815	14.5986	28.3528	27.0502	20.065	49.4384	ga2ox3	NA
GRMZM2G059634	cluster2	8.42838	7.96362	44.6692	54.8511	61.9496	46.1615	NA	Putative DUF26 domain family protein
GRMZM2G062121	cluster2	2.25842	17.8645	12.1181	30.3012	23.6873	28.4336	NA	NA
GRMZM2G471139	cluster2	0.166749	0.110398	0.904009	2.03765	2.6772	2.6714	NA	Uncharacterized protein
GRMZM5G800014	cluster2	0.973146	1.8484	5.19967	14.1245	21.1378	19.8666	NA	Uncharacterized protein
GRMZM2G335359	cluster2	0.541575	0.907925	2.95172	6.48646	6.39212	7.20483	NA	Uncharacterized protein
GRMZM2G170400	cluster2	5.47355	6.8312	30.336	26.7121	35.3125	32.4688	NA	S-adenosyl-L-methionine: phosphoethanolamine N-methyltransferase; Uncharacterized protein
GRMZM2G330907	cluster2	0.958868	1.13222	5.35066	7.93906	9.82255	9.56391	ltk2	Putative STRUBBELIG family receptor protein kinase
GRMZM2G099295	cluster2	129.064	146.691	730.423	1052.32	774.659	785.247	NA	Polygalacturonase inhibitor 1
GRMZM2G011115	cluster2	0.300437	4.96355	1.71537	4.34327	11.3905	5.35718	NA	NA
GRMZM2G119496	cluster2	0.203823	0.411594	1.17777	1.29939	1.33627	1.20361	NA	Uncharacterized protein
GRMZM2G119941	cluster2	1.55565	4.05488	9.1724	19.1611	20.9949	22.5852	incw4	Cell wall invertase
GRMZM2G154766	cluster2	0.493279	0.581249	3.03443	4.52989	5.34226	6.71922	NA	Putative lectin-domain receptor-like protein kinase family protein
GRMZM2G341934	cluster2	22.33	41.8411	139.346	236.094	263.66	239.086	NA	Uncharacterized protein
GRMZM2G437490	cluster2	0.0700346	0.291876	0.450409	1.18164	2.11464	2.03223	NA	NA
GRMZM2G174739	cluster2	0.105081	0.130695	0.649662	0.790534	1.16482	0.88194	NA	Putative inositol polyphosphate phosphatase (Synaptogenin-like) family protein
GRMZM2G154332	cluster2	0.885623	2.051	5.58863	4.86865	6.2723	7.6939	NA	SAUR12-auxin-responsive SAUR family member
GRMZM2G344339	cluster2	0.112016	0.301184	0.718906	0.816822	0.496522	1.19541	NA	Putative uncharacterized protein
GRMZM2G433908	cluster2	0.205636	0.140674	1.32909	1.71195	2.16965	3.20528	NA	NA
GRMZM2G019666	cluster2	0.112601	0.763788	0.741064	0.97062	1.50399	1.70715	NA	NA
GRMZM2G112039	cluster2	0.514865	3.0612	3.44108	10.4269	12.2006	16.1614	NA	NA
GRMZM2G068714	cluster2	0.382931	0.938619	2.62633	3.71503	4.54717	5.20308	NA	Uncharacterized protein
GRMZM2G428438	cluster2	0.158859	0.58452	1.11344	1.89354	1.53623	1.68731	NA	NA
GRMZM2G175401	cluster2	0.092228	0.0586346	0.61875	1.47684	0.236585	1.18073	NA	Uncharacterized protein
GRMZM2G091588	cluster2	0.223009	0.323747	1.58183	2.25667	2.19485	2.11383	cyp12	Cytochrome P450 monooxygenase CYP92A1
GRMZM2G145632	cluster2	0.0339239	0.0348974	0.251916	0.20442	0.108755	0.571452	NA	Uncharacterized protein
GRMZM2G101818	cluster2	0.287733	0.101073	2.21379	6.14719	0.694179	4.80027	php20608a	Uncharacterized protein
GRMZM2G181028	cluster2	2.31831	3.90377	17.8057	43.0326	59.292	59.0949	phyA2	Phytochrome A
GRMZM2G026157	cluster2	0.349736	0.665614	2.8975	3.59509	6.07898	7.63088	ca2p1	NA
GRMZM2G108153	cluster2	56.6472	221.207	439.846	792.866	1050.59	1495	NA	Uncharacterized protein
GRMZM2G097129	cluster2	4.66317	16.8814	36.9758	51.7187	42.3005	60.1101	NA	Putative uncharacterized protein
GRMZM2G132273	cluster2	0.0721812	0.0189744	0.545977	2.1565	1.23546	2.42738	NA	Disease resistance response protein 206
GRMZM2G070978	cluster2	0.948215	1.03113	8.29263	9.35246	10.6247	6.40763	NA	Putative mitochondrial import inner membrane translocase subunit Tim17 family protein
GRMZM2G064750	cluster2	0.0263606	0.182422	0.231777	0.29741	0.507265	0.378526	lrk1	Uncharacterized protein
GRMZM2G150594	cluster2	3.98683	10.0097	35.9824	38.416	54.28	37.1985	lbd42	Putative LOB domain-containing family protein; Uncharacterized protein
GRMZM2G057281	cluster2	0.211503	0.342144	2.04189	5.03733	1.1257	6.01938	NA	Chlorophyll a-b binding protein of LHCII type III
GRMZM2G435001	cluster2	5.53604	9.43344	52.2672	82.4185	75.9451	57.7206	NA	Putative HLH DNA-binding domain superfamily protein
AC194425.3_FG005	cluster2	0.539314	0.970919	5.6382	10.9407	18.5312	17.4721	NA	NA
GRMZM5G860761	cluster2	1.99592	2.57132	19.6974	33.8993	56.9156	45.5676	NA	Glucan endo-1;3-beta-glucosidase 4
GRMZM2G372633	cluster2	0.36529	0.410734	4.26375	5.91022	4.16633	4.1609	NA	Uncharacterized protein
GRMZM2G136857	cluster2	0.204507	1.43143	2.57394	1.57339	2.00543	3.61358	NA	Uncharacterized protein
GRMZM2G076468	cluster2	0.0725352	0.362842	1.01573	2.12091	1.28945	1.53242	mmp39	Uncharacterized protein
GRMZM2G036436	cluster2	0.195004	0.431501	2.53653	8.62878	12.5934	13.1916	NA	Uncharacterized protein
GRMZM2G110913	cluster2	2.40176	6.83219	32.9707	42.657	46.2932	35.1647	lbd3	Uncharacterized protein
GRMZM2G128421	cluster2	4.39209	16.5906	65.0737	100.724	109.515	91.7382	iaa22	Uncharacterized protein
GRMZM2G180975	cluster2	0.0157386	0.0450453	0.280761	1.22371	0.994031	1.54106	NA	NA
GRMZM2G123257	cluster2	0.652816	3.43119	10.4628	23.6249	36.0708	38.7293	NA	Uncharacterized protein
GRMZM2G447691	cluster2	0.936605	5.72261	14.8173	20.1392	16.0019	15.5947	NA	Putative uncharacterized protein
GRMZM2G134260	cluster2	0.940432	6.51534	16.1148	30.0515	35.33	43.6553	hb77	Putative homeobox DNA-binding and leucine zipper domain family protein
GRMZM2G142680	cluster2	0.0216682	0.0956608	0.406723	1.03809	0.657726	1.01586	NA	Uncharacterized protein
GRMZM2G122618	cluster2	0.0460256	0.313538	0.831618	1.10604	1.10083	1.05859	NA	Uncharacterized protein
GRMZM2G092483	cluster2	3.02656	24.6799	52.5331	91.2261	71.747	71.4313	lbd1	RTCN
GRMZM2G028870	cluster2	0.7428	4.27013	13.5187	23.5087	17.8752	22.9771	NA	NA
GRMZM2G114119	cluster2	0.0192313	0.0239006	0.43681	1.0222	0.695424	1.29005	NA	GDU1
GRMZM2G159285	cluster2	5.28889	21.2579	101.415	161.781	203.498	148.349	iaa4	Uncharacterized protein
GRMZM2G103897	cluster2	0.128482	0.833049	2.45756	6.93762	1.32254	8.91671	NA	Uncharacterized protein
GRMZM2G074211	cluster2	0.182846	0.143312	3.46744	5.5256	5.84465	4.96105	NA	Uncharacterized protein
GRMZM2G044752	cluster2	0.259229	1.15452	5.50537	5.68807	6.75692	7.05782	hb53	Homeobox-leucine zipper protein ATHB-4
GRMZM5G886185	cluster2	0.0338923	0.0432114	0.705229	0.565575	0.338022	1.49693	NA	Xyloglucan endotransglucosylase/hydrolase protein 26
GRMZM2G463986	cluster2	0	0.0214963	0.31564	2.36796	2.11202	3.58827	NA	NA
GRMZM2G456217	cluster2	3.25126	1.45291	78.2313	185.287	328.047	311.666	NA	Vignain
GRMZM2G181358	cluster2	0.553597	2.8317	13.5154	39.3737	52.2206	68.8101	NA	Uncharacterized protein
GRMZM2G116063	cluster2	0.245596	1.67307	6.58807	8.70979	6.47585	9.96376	wox5b	Putative wuschel homeobox protein
GRMZM2G480850	cluster2	0.0609398	0.453826	1.41274	3.04767	1.51139	3.61681	NA	CP12-1
GRMZM2G379445	cluster2	0.452681	0.883841	13.4972	18.0474	17.6463	12.5868	NA	Uncharacterized protein
GRMZM5G848185	cluster2	0	0.405204	0.312527	1.19287	0.785006	1.2831	mybr25	NA
GRMZM2G366373	cluster2	0.8042	5.74913	30.9779	51.4373	41.6522	31.3766	iaa3	Uncharacterized protein
GRMZM2G175761	cluster2	0	0.237241	0.404613	0.685284	0.920961	1.08921	limtf7	Pollen-specific protein SF3
GRMZM2G382350	cluster2	0.0246202	0.0754393	1.14394	1.6921	2.15607	2.6037	wrky19	NA
GRMZM5G812126	cluster2	0	0.074607	0.421359	2.61322	2.84811	4.00522	NA	Uncharacterized protein
GRMZM2G149700	cluster2	0.0242078	0	2.0091	2.65203	3.34057	2.99529	NA	Uncharacterized protein
GRMZM2G065290	cluster2	0.0201818	0.143602	1.64709	4.09139	5.07885	5.36728	wrky41	NA
GRMZM2G176056	cluster2	0	0.0985734	0.907798	0.941573	1.38084	1.16506	NA	Uncharacterized protein
GRMZM2G140996	cluster2	0.0134343	0.219349	1.32422	2.95293	2.36699	3.73408	NA	O-methyltransferase ZRP4
GRMZM2G120587	cluster2	0.243609	0.124532	21.5694	71.8247	108.174	111.946	NA	Uncharacterized protein
GRMZM2G439246	cluster2	0	0.0284491	0.838187	1.84446	1.33712	1.64475	NA	NA
GRMZM2G318614	cluster2	0.186159	1.33916	29.1522	70.0586	99.662	104.526	NA	Uncharacterized protein
GRMZM5G897005	cluster2	0	0.137306	1.52166	1.91486	2.49167	2.39263	NA	Uncharacterized protein
GRMZM2G369182	cluster2	0.047091	1.37391	8.65316	7.76638	10.1028	8.65245	NA	Uncharacterized protein
GRMZM2G419342	cluster2	0	0.0657024	0.5935	0.906195	0.751708	1.05608	NA	NA
GRMZM2G146540	cluster2	0.0135834	0.0173652	3.9103	5.88342	8.6557	10.5247	NA	Uncharacterized protein
GRMZM2G177298	cluster2	0.146751	0.557215	38.7193	63.4875	121.012	113.372	NA	Putative uncharacterized protein
GRMZM2G168439	cluster2	0.154775	5.39162	74.8379	161.531	167.889	192.691	tip2	Aquaporin TIP1-2
GRMZM2G031200	cluster2	0	0.12637	4.6069	9.14275	7.21309	7.5921	nactf87	NAC87 NAC type transcription factor
GRMZM2G308735	cluster2	0	0.664858	14.8798	17.0119	8.94816	26.4947	NA	Uncharacterized protein
GRMZM2G142913	cluster2	3.49119	5.84013	4.72366	7.02844	5.88237	5.37977	NA	NA
GRMZM2G098434	cluster2	5.66324	8.31631	9.06746	11.3685	11.954	10.979	NA	Uncharacterized protein
AC203841.3_FG002	cluster2	1.02273	1.18491	1.51238	2.04053	1.89876	2.03006	NA	Uncharacterized protein
GRMZM2G028492	cluster2	3.45418	3.70543	5.51678	6.95841	5.00984	5.94994	NA	Uncharacterized protein; Zinc finger C-x8-C-x5-C-x3-H type family protein
GRMZM2G017940	cluster2	1.19609	1.09359	2.0332	2.39327	3.151	2.78531	NA	Uncharacterized protein
GRMZM2G123362	cluster2	2.50695	3.91703	4.06001	5.10311	4.97581	5.33427	NA	Uncharacterized protein
GRMZM5G876303	cluster2	27.23	21.481	43.8188	55.0072	49.146	62.9428	NA	Putative glycosyltransferase
GRMZM2G162177	cluster2	2.09674	2.51154	3.27563	4.26907	4.14888	5.18533	NA	Uncharacterized protein
GRMZM2G162954	cluster2	8.8521	13.3988	15.8381	17.9021	16.8873	19.7465	NA	Uncharacterized protein
GRMZM2G350165	cluster2	19.551	20.1721	28.5961	39.6861	39.678	49.0027	bhlh88	Uncharacterized protein
GRMZM2G077183	cluster2	4.96905	8.51361	6.04028	10.1228	9.80879	9.97483	NA	Glutathione S-transferase theta-1; Uncharacterized protein
GRMZM2G325643	cluster2	3.23003	4.39125	5.07085	6.58341	6.83906	7.14937	NA	Uncharacterized protein
GRMZM2G128608	cluster2	1.80222	2.08623	2.83956	3.70148	3.81953	4.52176	NA	Putative FYVE zinc finger containing actin-binding-domain protein family
GRMZM5G867390	cluster2	8.87086	9.89622	15.4843	18.0988	17.4445	17.8722	ptr1	Uncharacterized protein
GRMZM2G027075	cluster2	2.29437	2.84566	3.96414	4.71854	5.04839	5.17709	jmj4	Uncharacterized protein
GRMZM5G854613	cluster2	43.1562	75.4743	64.5974	88.2696	87.8305	96.4859	NA	Uncharacterized protein
GRMZM2G025074	cluster2	18.5161	26.6897	36.9724	37.9289	40.5826	46.5205	NA	Uncharacterized protein
GRMZM2G135038	cluster2	5.37898	7.27843	8.82946	11.0159	13.3892	16.272	NA	NA
GRMZM2G434696	cluster2	7.88666	14.255	14.0872	16.2063	16.1203	15.7741	pza00424	NA
GRMZM2G142266	cluster2	3.93774	5.27478	6.0634	8.02728	6.52134	6.7721	NA	NA
GRMZM2G036418	cluster2	2.16117	2.69791	3.05983	4.49479	4.63613	4.47929	NA	NA
GRMZM5G848768	cluster2	95.7804	180.588	142.189	198.034	199.616	249.247	NA	Uncharacterized protein
GRMZM5G840699	cluster2	2.34002	3.20614	4.01754	4.86651	4.67208	4.6455	NA	NA
GRMZM2G521844	cluster2	3.16459	3.99407	5.54315	6.49554	6.96786	7.06398	NA	Uncharacterized protein
GRMZM2G017805	cluster2	7.88873	11.1617	11.7739	16.3519	20.8189	23.8225	crup1	Uncharacterized protein
GRMZM2G004455	cluster2	5.27526	8.66297	8.57058	10.9877	10.5072	11.5955	NA	Uncharacterized protein
GRMZM2G086541	cluster2	9.50891	8.59579	18.5823	19.7669	21.1579	17.721	NA	Uncharacterized protein
GRMZM2G145088	cluster2	10.3806	10.998	16.819	21.644	21.0657	22.7043	NA	Uncharacterized protein
GRMZM2G303007	cluster2	1.4411	1.99049	2.82321	2.99518	3.3365	3.13663	NA	NA
GRMZM2G070429	cluster2	3.93575	4.40467	6.42157	8.21581	11.1235	11.3057	NA	Lipase
GRMZM2G325693	cluster2	9.00612	21.1219	12.8608	18.7708	20.4758	18.7351	NA	Putative uncharacterized protein
GRMZM2G095206	cluster2	2.59761	3.51181	4.93047	5.43039	3.65097	6.20452	NA	Uncharacterized protein
GRMZM2G013357	cluster2	0.674304	0.632661	0.728496	1.42246	0.997609	1.85547	NA	Wax synthase isoform 1
GRMZM2G172132	cluster2	8.19951	8.43309	12.2087	17.3258	19.6155	18.6301	tlk2	Uncharacterized protein
GRMZM2G000749	cluster2	9.42171	12.4731	15.781	19.7877	23.8106	27.8624	NA	Uncharacterized protein
GRMZM2G142875	cluster2	2.98943	3.91588	4.43033	6.35931	7.43509	6.74457	NA	Uncharacterized protein
GRMZM2G132403	cluster2	4.74186	7.05899	8.58905	9.98506	9.26374	10.4397	NA	Uncharacterized protein
GRMZM2G301122	cluster2	3.14378	4.26082	5.86445	6.65819	8.53684	9.37818	NA	Uncharacterized protein
GRMZM2G407361	cluster2	2.54004	3.80039	5.02461	5.45784	6.39408	8.85168	NA	Uncharacterized protein
GRMZM2G397836	cluster2	6.70075	10.3099	12.9211	14.1978	16.9166	16.6291	NA	NA
GRMZM2G169671	cluster2	180.977	269.123	269.272	382.726	327.655	317.045	NA	NA
GRMZM2G044681	cluster2	2.92353	3.83779	3.89009	6.20859	6.34936	6.68495	NA	Uncharacterized protein
GRMZM5G871143	cluster2	11.7718	14.2157	17.0201	25.0037	25.2861	25.6979	NA	Uncharacterized protein
GRMZM2G039280	cluster2	2.66182	3.74467	4.17361	5.67309	4.96715	4.75113	NA	Ethylene-overproduction protein 1
GRMZM2G087598	cluster2	7.4756	9.53144	10.0183	15.9016	11.2785	15.6175	NA	Filamentation temperature-sensitive H 2B; Filamentation temperature-sensitive H 2B isoform 1; Filamentation temperature-sensitive H 2B isoform 2
GRMZM2G134045	cluster2	6.58155	8.23251	12.9535	13.9987	19.3678	21.2561	NA	ADP-ribosylation factor GTPase-activating protein 3; Putative ARF GTPase-activating domain family protein; Uncharacterized protein
AC177908.3_FG002	cluster2	3.32087	4.47408	5.14945	7.03877	7.73123	7.72516	NA	Transferase; transferring glycosyl groups; Uncharacterized protein
GRMZM2G180509	cluster2	3.13275	3.75553	4.33875	6.68697	6.50113	7.69331	NA	NA
GRMZM2G480002	cluster2	12.11	12.1018	19.6976	25.8855	24.3652	24.4004	NA	NA
GRMZM2G014400	cluster2	4.13493	4.64012	6.3669	8.85209	10.1275	11.6665	NA	NA
GRMZM5G890843	cluster2	2.62909	3.34967	4.38333	5.65838	5.45768	6.96857	NA	Zinc finger; C3HC4 type family protein
GRMZM2G119079	cluster2	11.8703	18.4513	19.6132	25.4294	26.7278	26.5424	NA	Dual-specificity protein-like phosphatase 1; Protein-tyrosine phosphatase mitochondrial 1
GRMZM2G029547	cluster2	4.51875	3.85222	4.08565	9.76839	5.18727	13.019	NA	NA
GRMZM2G063511	cluster2	10.1555	15.8777	19.3652	21.8943	28.259	20.9716	NA	Integral membrane protein like protein; Uncharacterized protein
GRMZM2G149265	cluster2	8.53246	10.3461	14.9243	18.5019	20.4471	26.1934	AY110569	Uncharacterized protein
GRMZM2G159134	cluster2	5.94742	8.52689	9.20719	12.8814	13.2434	13.2951	bzip102	Uncharacterized protein
GRMZM2G148925	cluster2	92.4039	118.372	143.861	200.784	231.471	289.116	psei7	Cystatin; Uncharacterized protein
GRMZM2G158069	cluster2	1.44511	2.04435	2.35517	3.17804	3.12266	3.02067	NA	Uncharacterized protein
GRMZM2G039525	cluster2	10.1767	9.72348	16.5391	22.1465	27.6338	24.6685	NA	Uncharacterized protein
GRMZM2G324705	cluster2	37.9345	25.9268	65.5736	83.1371	112.374	118.697	NA	Putative uncharacterized protein
GRMZM2G071347	cluster2	1.98083	2.66555	3.74809	4.34277	4.93633	4.35484	NA	Uncharacterized protein
GRMZM2G062354	cluster2	16.7508	20.0334	27.8176	36.7848	39.0992	44.3648	NA	Uncharacterized protein
GRMZM2G003518	cluster2	2.18242	1.83762	4.18778	4.78672	5.51814	6.39248	NA	Uncharacterized protein
GRMZM2G151309	cluster2	0.749683	0.531146	1.33219	1.65388	1.67429	1.54195	NA	DNA binding protein; mRNA
GRMZM2G159587	cluster2	10.3903	37.1041	14.1879	22.9817	24.2799	26.0486	NA	Glyoxylate reductase
GRMZM2G121063	cluster2	7.05771	9.89175	13.2604	15.7704	14.9865	17.5607	NA	Uncharacterized protein
GRMZM2G005350	cluster2	6.24832	6.75341	9.08616	13.9837	14.6431	17.6097	NA	MAP kinase phosphatase isoform 1; MAP kinase phosphatase isoform 2
AC217811.3_FG003	cluster2	1.19956	1.10174	1.94403	2.67394	2.77719	4.1124	NA	Uncharacterized protein
GRMZM2G097841	cluster2	1.50086	2.35007	3.75583	3.37246	3.81237	6.09494	NA	Leucoanthocyanidin reductase
GRMZM2G178398	cluster2	23.6389	30.3538	35.329	52.91	61.6478	74.8585	NA	Uncharacterized protein
GRMZM2G446625	cluster2	1.84434	2.31659	3.10139	4.13908	5.13521	5.48655	NA	Putative uncharacterized protein
GRMZM2G107867	cluster2	5.66221	16.325	10.8275	12.8114	11.9976	17.0729	pza03243	SNF1-related protein kinase; Uncharacterized protein
GRMZM2G109175	cluster2	17.453	14.5552	26.1868	39.2588	62.2412	57.4837	NA	Uncharacterized protein
GRMZM2G127115	cluster2	4.23672	4.50046	6.67611	9.61281	8.15646	9.16975	NA	Uncharacterized protein
GRMZM5G872934	cluster2	3.40937	6.60729	6.10815	7.72397	7.24369	7.94726	NA	Uncharacterized protein
GRMZM2G077711	cluster2	2.86962	2.47663	4.30094	6.5066	6.2347	6.88284	NA	Uncharacterized protein
GRMZM2G159926	cluster2	6.61544	10.1521	11.1012	15.0294	14.5917	18.325	NA	DNA binding protein
GRMZM2G119623	cluster2	7.26799	11.1636	12.848	16.508	21.6204	26.6123	NA	NA
GRMZM2G126834	cluster2	4.69179	7.48228	9.13238	10.652	12.0153	14.3413	arr1	ARR-B family member; ARR-B transcription factor; Putative two-component response regulator family protein isoform 1; Putative two-component response regulator family protein isoform 2; Uncharacterized protein
GRMZM2G093755	cluster2	11.5432	37.4452	18.9214	26.6061	25.2863	30.8547	NA	NA
GRMZM2G002135	cluster2	2.97861	2.52191	4.08769	6.86398	5.77341	8.32097	NA	Uncharacterized protein
GRMZM2G172829	cluster2	11.0332	11.4068	17.0376	25.698	25.5549	26.3207	NA	Uncharacterized protein
GRMZM2G157422	cluster2	8.04788	12.1076	14.8733	18.8155	20.746	21.9614	NA	Embryonic flower 2; VEF family protein
GRMZM2G151734	cluster2	11.5561	18.2906	18.1554	26.967	26.1952	38.1302	NA	Uncharacterized protein
GRMZM2G010349	cluster2	7.92873	9.78678	15.2335	18.5281	17.0858	18.1998	NA	Uncharacterized protein
AC217401.3_FG001	cluster2	3.97371	6.65555	6.81231	9.30342	10.394	9.58876	NA	Non-cyanogenic beta-glucosidase
GRMZM2G462062	cluster2	6.07056	8.35578	10.8215	14.2331	15.7727	22.9742	NA	Uncharacterized protein
GRMZM2G171822	cluster2	19.207	23.3081	36.423	45.4798	40.6896	40.3039	bif2	NA
GRMZM2G027166	cluster2	3.64263	3.93104	5.44058	8.57403	8.97198	11.948	NA	Genetic modifier; Uncharacterized protein
GRMZM2G138255	cluster2	1.64463	2.90377	3.16088	3.92607	3.79315	4.85867	NA	Putative ARM repeat-containing protein containing family protein; Uncharacterized protein
GRMZM2G433579	cluster2	6.88589	10.3609	12.0512	16.432	17.0417	16.7916	NA	NA
GRMZM2G059671	cluster2	3.13324	3.49416	4.6829	7.49521	9.61573	10.3623	NA	Uncharacterized protein
GRMZM2G031718	cluster2	1.27732	1.64926	1.91345	3.03645	2.65181	2.89933	NA	NA
GRMZM2G126413	cluster2	2.66306	3.26748	5.20345	6.49045	9.34522	8.27301	NA	NA
GRMZM2G058528	cluster2	1.45936	2.64013	2.77006	3.52561	3.60954	4.41136	NA	Uncharacterized protein
GRMZM2G076657	cluster2	1.37208	1.71166	2.02797	3.33789	3.28588	5.19182	wrky58	SPF1-like DNA-binding protein
GRMZM2G022313	cluster2	8.64301	10.8949	15.119	21.0924	22.0354	26.2609	NA	Uncharacterized protein
GRMZM5G871018	cluster2	0.674457	0.597304	1.3549	1.66781	1.52771	1.40797	NA	Uncharacterized protein
GRMZM2G004079	cluster2	4.25622	4.68614	7.71285	10.5424	9.46322	11.2692	NA	Uncharacterized protein
GRMZM2G158972	cluster2	2.54596	3.34667	3.58168	6.31316	7.26598	7.66019	NA	Putative inositol polyphosphate phosphatase (Synaptogenin-like) family protein
GRMZM2G067489	cluster2	4.24145	5.24073	6.64011	10.4229	15.7498	14.5552	NA	RING-H2 finger protein ATL2B; Uncharacterized protein
GRMZM2G073584	cluster2	9.39142	10.3649	15.7094	23.5098	21.2905	23.3137	NA	NA
GRMZM2G179432	cluster2	12.1819	26.4059	27.2346	30.5364	59.762	47.2783	NA	Uncharacterized protein
GRMZM2G056732	cluster2	16.9142	41.1506	48.1014	42.7088	33.954	72.0185	snrkII2	Uncharacterized protein
GRMZM2G104390	cluster2	3.5858	5.52669	8.26832	9.07859	8.12973	11.4047	gata2	GATA transcription factor 22; Uncharacterized protein
GRMZM2G145583	cluster2	2.06536	3.28621	3.16633	5.35067	5.91489	5.83841	NA	Uncharacterized protein
GRMZM2G139041	cluster2	12.1605	7.27227	11.269	30.8963	24.8564	45.5144	AY110160	Uncharacterized protein
GRMZM2G027193	cluster2	32.1289	51.7212	60.2955	83.4786	95.7176	108.007	NA	Uncharacterized protein
GRMZM5G886913	cluster2	4.81319	6.67277	8.51479	12.5407	12.1168	12.1018	NA	Uncharacterized protein
AC219061.2_FG007	cluster2	3.32273	4.05613	5.49415	8.78962	9.60276	11.1357	NA	Uncharacterized protein
GRMZM2G108767	cluster2	3.10161	5.9476	7.23898	8.14051	7.54167	8.93859	fpox1	Senescence-associated-like protein
GRMZM2G099987	cluster2	3.39963	5.48524	6.83845	9.00854	9.60672	9.16879	NA	Putative uncharacterized protein
GRMZM2G085035	cluster2	3.57827	6.8683	6.01217	9.47844	8.74209	7.25547	ofp35	Uncharacterized protein
GRMZM2G451672	cluster2	3.71389	6.59364	7.28198	9.86469	11.0858	13.8647	NA	Uncharacterized protein
GRMZM2G381059	cluster2	3.44903	9.36941	6.87138	9.29149	11.6016	13.9991	NA	Putative uncharacterized protein
GRMZM2G084881	cluster2	41.7535	103.215	72.9568	113.25	104.674	117.654	dar1	Uncharacterized protein
GRMZM2G467339	cluster2	1.18659	1.43139	2.03597	3.22834	4.27493	4.57901	NA	NA
GRMZM2G328341	cluster2	0.75385	0.678884	1.69148	2.06187	1.9592	3.23308	NA	Uncharacterized protein
GRMZM2G170013	cluster2	2.6309	2.11923	4.73788	7.19322	7.98994	11.8529	nyc1	Uncharacterized protein
GRMZM2G060485	cluster2	11.0593	14.1462	22.0447	30.5993	39.7268	39.1238	glk24	Uncharacterized protein
GRMZM2G171595	cluster2	2.46368	3.116	4.67969	6.79333	7.39692	8.60218	NA	Uncharacterized protein
GRMZM2G017522	cluster2	2.58348	6.42418	2.96507	7.49345	6.62671	8.64812	NA	Uncharacterized protein
GRMZM2G399901	cluster2	2.0918	2.44544	3.64753	6.15411	6.87806	7.08312	NA	Uncharacterized protein
GRMZM2G424832	cluster2	13.8904	14.3196	18.8579	40.9568	48.7971	60.8652	cesa4	Cellulose synthase-4
GRMZM2G079112	cluster2	3.61491	4.30519	6.39675	10.8542	10.753	11.442	NA	Uncharacterized protein
GRMZM2G170281	cluster2	5.01645	8.7584	9.33274	15.0593	16.9569	20.9631	NA	Transmembrane 9 family protein member 4; Uncharacterized protein
GRMZM2G143029	cluster2	1.61773	1.72378	3.03289	4.86387	3.90224	4.41184	NA	NA
GRMZM5G825854	cluster2	9.27145	13.5857	18.3266	28.0043	30.5248	32.5697	NA	NA
GRMZM5G869971	cluster2	0.848844	0.915129	1.22624	2.58641	3.31948	3.74762	NA	Putative lectin-domain receptor-like protein kinase family protein; Uncharacterized protein
GRMZM2G070295	cluster2	1.15882	1.71133	2.40458	3.61993	5.42894	5.28618	platz9	NA
GRMZM2G152126	cluster2	1.96838	2.15343	3.52174	6.06135	5.3075	7.99311	NA	Uncharacterized protein
GRMZM2G080940	cluster2	29.0334	26.7422	55.2626	91.3305	129.923	151.05	NA	Lipase
GRMZM2G081803	cluster2	0.594945	0.45746	0.976079	1.83656	2.67187	2.66441	NA	Putative uncharacterized protein
GRMZM5G872068	cluster2	127.149	478.825	207.46	403.012	476.587	504.624	gln4	Glutamine synthetase root isozyme 3
GRMZM2G109299	cluster2	1.38728	4.53136	2.60509	4.27831	5.53612	4.6116	NA	Putative uncharacterized protein
GRMZM2G159500	cluster2	10.2426	11.037	16.5859	32.8454	40.707	52.6318	nactf29	GRAB2 protein; Putative NAC domain transcription factor superfamily protein
AC205673.3_FG006	cluster2	0.750029	1.023	1.52555	2.50212	2.39987	2.86067	NA	NA
GRMZM2G432390	cluster2	5.78594	12.4738	17.4973	18.8727	17.924	23.6912	NA	Putative uncharacterized protein
GRMZM2G136580	cluster2	3.33731	13.1884	9.88149	10.8722	18.1211	17.5526	NA	NA
GRMZM2G473152	cluster2	0.906758	0.818709	2.04627	2.97204	3.03731	2.81272	cadtfr2	NA
GRMZM2G144744	cluster2	20.7827	29.4482	39.5993	69.1834	60.0911	73.2777	d8	DELLA protein DWARF8
GRMZM2G035213	cluster2	20.649	30.353	40.8477	69.1178	63.7874	65.4255	vte4	Gamma-tocopherol methyltransferase; Uncharacterized protein
GRMZM2G035595	cluster2	5.85396	10.6928	11.3198	19.7407	18.5043	18.4961	NA	Uncharacterized protein
GRMZM2G376595	cluster2	1.23447	1.78729	2.42144	4.2305	5.36516	5.8234	NA	NA
GRMZM2G003883	cluster2	20.5917	39.1539	38.8221	70.6734	88.6647	92.0189	phm15899	Pyruvate kinase
GRMZM2G175816	cluster2	2.45618	4.50147	9.43647	8.44341	12.5642	8.80167	NA	Uncharacterized protein
GRMZM2G026470	cluster2	46.0781	129.281	62.5653	162.476	196.918	193.677	NA	Soluble inorganic pyrophosphatase; Uncharacterized protein
GRMZM2G058220	cluster2	0.345622	0.24688	0.621295	1.20701	1.84908	1.99042	NA	NA
GRMZM2G180419	cluster2	0.67228	1.76198	3.90563	2.4399	3.18223	6.05171	NA	Uncharacterized protein
GRMZM2G014839	cluster2	0.910197	2.70616	1.94928	3.30653	3.27298	3.99077	NA	Uncharacterized protein
GRMZM2G178875	cluster2	93.5294	312.048	169.424	347.686	314.388	259.314	NA	Uncharacterized protein
GRMZM2G089698	cluster2	13.1819	43.6315	21.7604	49.1192	51.8945	60.0642	NA	Anthranilate N-benzoyltransferase protein 1
GRMZM2G039399	cluster2	0.316313	0.791662	1.09635	1.21222	1.23321	1.8745	NA	Uncharacterized protein
GRMZM2G146679	cluster2	0.259103	0.133012	0.22864	0.99851	0.747251	1.4973	NA	Putative uncharacterized protein
AC233850.1_FG001	cluster2	7.20495	21.2492	17.759	28.4716	38.6566	42.7906	NA	NA
GRMZM2G300924	cluster2	0.400171	0.799155	1.38575	1.58837	3.51573	2.81329	ereb170	Putative AP2/EREBP transcription factor superfamily protein
GRMZM2G459052	cluster2	2.2925	5.40853	10.9396	9.17536	14.6263	12.369	NA	Uncharacterized protein
GRMZM2G064202	cluster2	0.22109	0.444635	0.516229	0.878758	1.02355	0.954529	NA	Glucan endo-1;3-beta-glucosidase
GRMZM2G036464	cluster2	16.7422	121.476	52.8142	67.4674	87.3758	93.5723	gln5	Glutamine synthetase root isozyme 4
GRMZM2G047791	cluster2	7.32291	8.39115	13.349	29.5831	43.8962	43.9935	NA	Uncharacterized protein
GRMZM2G020002	cluster2	4.35644	14.1072	12.9208	17.9457	17.9879	17.6884	NA	Uncharacterized protein
GRMZM2G084576	cluster2	0.156867	0.348451	0.58943	0.661363	1.07562	0.846105	NA	Putative HLH DNA-binding domain superfamily protein
GRMZM2G017474	cluster2	0.18469	0.703453	0.801104	0.764106	1.33602	1.14111	NA	Uncharacterized protein
GRMZM2G061396	cluster2	0.183925	0.181666	0.359044	0.735928	1.2591	1.161	NA	BCL-2 binding anthanogene-1
GRMZM2G102674	cluster2	2.27522	11.3828	9.45341	10.3638	11.288	15.0419	NA	Uncharacterized protein
GRMZM2G079583	cluster2	5.02091	19.1142	16.7039	22.7072	24.6364	26.1383	NA	Putative leucine-rich repeat transmembrane protein kinase family protein isoform 1; Putative leucine-rich repeat transmembrane protein kinase family protein isoform 2; Putative leucine-rich repeat transmembrane protein kinase family protein isoform 3; Putative leucine-rich repeat transmembrane protein kinase family protein isoform 4; Uncharacterized protein
GRMZM2G021879	cluster2	1.75634	4.8453	7.79168	8.02064	9.72238	10.3856	NA	Putative RING zinc finger domain superfamily protein
GRMZM2G169329	cluster2	12.2038	53.3907	21.3159	58.2739	10.4439	68.612	NA	Uncharacterized protein
GRMZM2G057733	cluster2	0.197161	0.10885	0.35084	0.895226	1.20863	1.45752	NA	NA
GRMZM2G161274	cluster2	2.73772	1.7762	7.30877	13.5314	11.9988	19.5587	NA	Ribonuclease 3; Uncharacterized protein
GRMZM2G046313	cluster2	0.357723	0.450908	1.21508	1.82897	1.83759	1.66854	NA	RNA recognition motif 2 family protein
GRMZM2G461666	cluster2	0.527692	1.08495	2.41808	2.73063	2.48867	2.63459	NA	Uncharacterized protein
GRMZM5G820287	cluster2	0.192059	0.360792	0.469742	0.956739	0.605647	1.08535	NA	NA
GRMZM2G157912	cluster2	1.66176	3.55286	5.35934	8.67616	6.31191	9.75851	NA	NA
GRMZM2G147687	cluster2	55.4344	189.772	227.325	302.457	279.458	400.614	exg1	Uncharacterized protein
GRMZM2G058032	cluster2	39.203	216.639	194.913	217.06	234.624	376.355	NA	Circumsporozoite protein
GRMZM2G106445	cluster2	5.19011	22.4188	32.2977	29.3472	36.2334	53.2137	NA	Uncharacterized protein; Wound induced protein
GRMZM2G049654	cluster2	1.26837	5.96653	7.34982	7.02494	8.68687	11.0842	NA	Putative uncharacterized protein
GRMZM2G105400	cluster2	5.81704	12.4902	22.3359	33.1606	23.9075	32.9618	NA	Transposon protein Mutator sub-class
GRMZM2G028413	cluster2	1.03966	2.23178	4.90431	6.03475	7.74461	10.7952	NA	Uncharacterized protein
GRMZM2G113668	cluster2	24.1825	65.2914	121.812	142.668	154.316	160.057	NA	NA
GRMZM2G448368	cluster2	0.897493	5.53096	7.31394	6.05217	8.47876	14.5471	NA	NA
GRMZM2G180889	cluster2	4.20134	13.1591	20.5931	28.6032	34.0594	36.0817	NA	NA
GRMZM2G383790	cluster2	1.03052	1.85023	6.92705	7.20856	9.58135	8.30122	NA	NA
GRMZM2G025171	cluster2	0.217484	0.293451	0.366814	1.5313	0.980766	1.93054	NA	H(+)-transporting ATP synthase isoform 1; H(+)-transporting ATP synthase isoform 2; Uncharacterized protein
GRMZM2G157760	cluster2	0.542651	2.76248	1.64417	3.95	7.47437	5.22948	NA	Uncharacterized protein
GRMZM5G862757	cluster2	0.151427	0.289718	0.397067	1.23994	0.981716	1.93151	NA	Uncharacterized protein
GRMZM2G160231	cluster2	0.207012	0.71855	1.8199	1.70288	1.53547	2.50655	NA	Uncharacterized protein
GRMZM2G019777	cluster2	1.95283	4.722	9.76514	16.9114	13.1348	29.5622	NA	Uncharacterized protein
GRMZM2G429928	cluster2	0.15962	0.220502	1.38013	1.42298	1.35209	1.53325	NA	NA
GRMZM2G702103	cluster2	0.188344	0.558015	0.84865	1.54082	2.37832	2.13806	NA	NA
GRMZM2G338454	cluster2	0.119424	0.229876	0.530295	0.999045	0.840806	1.96849	pebp3	Uncharacterized protein
GRMZM2G111886	cluster2	2.50309	2.08472	4.75307	22.7335	20.1372	32.4427	NA	Uncharacterized protein
GRMZM2G429396	cluster2	0.711108	4.04789	6.66904	7.03372	4.41246	9.6267	NA	Hsp20/alpha crystallin family protein
GRMZM2G129266	cluster2	0.35259	7.48052	0.396472	3.52078	4.21366	3.07468	hct13	10-deacetylbaccatin III 10-O-acetyltransferase
GRMZM5G805685	cluster2	1.75259	4.84233	12.4708	17.7537	13.9375	15.9014	abi41	Uncharacterized protein
GRMZM2G041462	cluster2	1.1149	3.13849	8.6524	11.611	11.3194	12.9997	hb128	Uncharacterized protein
AC231755.1_FG010	cluster2	0.121379	0	0.0698742	1.31371	0.867822	2.2253	NA	Uncharacterized protein
AC233901.1_FG008	cluster2	0.0665578	0	0.409784	0.873767	1.30067	1.29853	NA	Uncharacterized protein
GRMZM5G887975	cluster2	0.249189	0.481989	4.81444	3.25397	3.94993	6.1295	gata21	Uncharacterized protein
GRMZM2G180324	cluster2	0.369904	1.37005	3.44839	4.76085	8.57382	8.29525	NA	Uncharacterized protein
GRMZM2G039312	cluster2	0.557998	3.0437	5.04355	7.60077	6.20147	5.29192	ofp5	NA
GRMZM2G165255	cluster2	0.282671	1.42201	2.70644	4.35495	4.21057	3.41777	NA	Putative uncharacterized protein
GRMZM2G096577	cluster2	0.0329028	0.0627803	0.13143	0.688601	0.904507	1.19946	NA	NA
GRMZM2G068510	cluster2	0.369578	2.6182	9.92219	10.9001	19.4895	21.9479	NA	NA
GRMZM2G143328	cluster2	0.0364717	0.134618	0.153401	1.35018	0.598929	1.62774	myb53	R2R3MYB-domain protein
GRMZM5G872499	cluster2	0.188402	1.21123	7.43635	8.50569	9.75406	8.49727	phos3	NA
GRMZM2G401883	cluster2	0	0.158448	0.8651	1.07042	1.06847	0.923005	NA	Uncharacterized protein
GRMZM2G320269	cluster2	1.63967	11.665	85.3428	162.002	154.199	146.263	NA	Uncharacterized protein
GRMZM2G303361	cluster2	0.155483	2.9387	10.5177	16.6032	29.3486	28.7761	NA	NA
GRMZM2G133631	cluster2	13.9988	24.8765	21.9166	27.5126	28.2273	37.352	NA	CAPIP1; Uncharacterized protein
GRMZM2G138814	cluster2	11.7631	14.1802	22.1798	21.9197	23.6824	24.5377	snrk1a3	NA
GRMZM2G119411	cluster2	5.18252	8.07897	6.98562	8.15748	10.4285	8.97563	gpm6	Uncharacterized protein
GRMZM2G150201	cluster2	6.58494	6.50831	9.29384	11.7813	13.3013	14.2009	NA	Uncharacterized protein
GRMZM2G089484	cluster2	9.74994	9.97983	12.9618	18.65	19.7212	21.9615	mpk6	Mitogen activated protein kinase 6; Putative MAP kinase family protein; Uncharacterized protein
GRMZM2G155332	cluster2	4.30669	4.74911	7.57553	8.34777	8.77181	9.19487	NA	Uncharacterized protein
GRMZM2G060357	cluster2	9.60413	15.747	15.2261	18.9448	19.5356	16.9598	NA	Ascorbate-specific transmembrane electron transporter 1
GRMZM2G017682	cluster2	3.19048	5.06422	5.86331	4.35677	6.51301	6.19654	NA	NA
GRMZM2G054070	cluster2	3.66874	4.60106	5.96442	6.54039	7.54352	7.96186	NA	Uncharacterized protein
GRMZM2G145063	cluster2	9.12501	16.3367	15.1782	18.1796	18.816	19.0173	NA	Uncharacterized protein
GRMZM2G022782	cluster2	1.29803	1.5517	1.9527	2.4096	2.73092	3.30264	NA	Uncharacterized protein
GRMZM5G837364	cluster2	14.5021	22.6241	19.093	28.7526	30.524	33.0559	NA	Methionine aminopeptidase
GRMZM2G017254	cluster2	9.58807	14.264	17.7477	18.2764	20.1156	20.7427	NA	Uncharacterized protein
GRMZM2G423025	cluster2	1.14569	2.00326	1.28934	2.13612	2.41998	2.45117	NA	Uncharacterized protein
GRMZM2G054227	cluster2	5.88228	8.3497	7.67751	10.8433	12.3813	14.3349	NA	CASP-like protein 18
GRMZM2G069758	cluster2	9.79315	16.6053	14.0792	19.425	20.7267	19.6514	NA	Pyridoxal kinase
GRMZM2G133885	cluster2	4.53068	6.80458	7.14518	8.76837	9.56264	9.95207	NA	Uncharacterized protein
GRMZM2G113276	cluster2	5.22541	7.43275	8.34652	9.97149	11.0827	11.9646	NA	Uncharacterized protein
GRMZM2G137971	cluster2	4.01589	5.08824	5.41369	6.65285	8.54694	8.65508	NA	Uncharacterized protein
GRMZM2G306079	cluster2	3.95453	4.89029	7.10092	7.08224	8.48731	10.0279	NA	Uncharacterized protein
GRMZM2G007848	cluster2	7.80778	11.7893	13.0744	15.21	16.8967	21.8497	NA	Putative MAP kinase family protein; Uncharacterized protein
GRMZM2G105192	cluster2	6.57993	12.0763	11.3246	12.037	14.1799	14.4317	NA	Uncharacterized protein
GRMZM2G080156	cluster2	3.3715	5.37082	6.37458	6.18912	7.38702	6.98919	NA	Uncharacterized protein
GRMZM2G080048	cluster2	59.4318	72.5906	106.904	94.3502	129.602	156.449	NA	Eukaryotic translation initiation factor 2 beta subunit; Uncharacterized protein
GRMZM2G064386	cluster2	7.38504	18.0772	11.6592	14.1849	16.1145	15.3951	NA	Uncharacterized protein
GRMZM2G045241	cluster2	14.0199	21.1831	27.8352	26.6451	30.5907	42.2492	NA	Serine/threonine-protein kinase MHK; Uncharacterized protein
GRMZM2G130800	cluster2	49.9437	35.5061	76.3081	81.5338	109.791	89.6149	NA	Uncharacterized protein
GRMZM2G003289	cluster2	2.18171	2.20637	2.86779	3.23916	4.77853	4.03098	NA	Uncharacterized protein
GRMZM2G415491	cluster2	4.9348	5.38129	7.63352	9.48184	10.9063	10.3871	rh3	Uncharacterized protein
GRMZM5G803318	cluster2	6.35866	8.58954	11.4	10.9775	14.0421	17.5447	NA	Uncharacterized protein
AC210013.4_FG014	cluster2	3.68794	5.00481	5.15968	8.65385	8.17543	10.1399	NA	Uncharacterized protein
GRMZM2G143205	cluster2	5.0089	7.11268	7.49338	11.5191	11.1565	12.2161	camta1	Uncharacterized protein
GRMZM2G042055	cluster2	4.56735	7.76355	6.7147	8.75934	10.2334	11.0654	NA	NA
GRMZM2G092571	cluster2	3.50617	4.37584	6.50638	6.733	7.85623	9.60615	NA	DHHC zinc finger domain containing protein isoform 1; DHHC zinc finger domain containing protein isoform 2; DHHC zinc finger domain containing protein isoform 3; Uncharacterized protein
GRMZM2G029478	cluster2	10.686	13.2529	20.2898	21.1541	24.0495	21.6841	NA	F-box domain containing protein; F-box domain containing protein isoform 1; F-box domain containing protein isoform 2; F-box domain containing protein isoform 3; F-box domain containing protein isoform 4
GRMZM2G176546	cluster2	11.7446	19.446	21.3452	31.172	26.4832	30.4953	NA	Uncharacterized protein
GRMZM2G087758	cluster2	3.4327	4.36422	5.62129	6.52789	7.76039	6.41812	NA	DnaJ domain containing protein; Uncharacterized protein
GRMZM2G010152	cluster2	4.39333	4.7146	5.18954	8.66662	9.95866	11.7569	NA	Uncharacterized protein
GRMZM2G416184	cluster2	1.16646	1.87401	1.87084	2.5913	2.66048	2.66901	NA	NA
GRMZM5G871592	cluster2	22.2706	15.6997	44.1209	44.4685	50.8979	47.9167	NA	NA
GRMZM5G879882	cluster2	24.1366	31.7309	39.7857	44.5659	55.2489	64.6607	NA	6-phosphofructokinase; Uncharacterized protein
GRMZM5G889999	cluster2	17.2714	15.0327	27.3629	30.547	39.5903	41.7721	kik1	Serine/threonine-protein kinase
GRMZM2G066820	cluster2	9.15596	12.2005	13.1252	16.1435	21.0049	19.1933	NA	Arabinose-proton symporter; Uncharacterized protein
GRMZM2G155321	cluster2	28.3163	34.042	42.4992	50.8222	65.0573	76.4087	NA	Uncharacterized protein
GRMZM5G838414	cluster2	1.93901	2.89089	3.76127	4.73619	4.62137	3.70899	NA	Beta-1;3-galactosyltransferase 6
GRMZM2G156415	cluster2	3.28234	2.91867	4.58046	6.3538	7.75875	8.75878	NA	Putative RING zinc finger domain superfamily protein isoform 1; Putative RING zinc finger domain superfamily protein isoform 2
GRMZM2G349996	cluster2	2.14049	1.901	3.44205	2.76336	4.98941	3.41631	NA	NA
GRMZM2G044377	cluster2	1.34537	1.15309	1.79421	2.12161	3.21502	2.93906	NA	Uncharacterized protein
GRMZM2G154397	cluster2	435.138	812.878	1135.69	1613.12	1047.88	1472.31	sam2	S-adenosylmethionine decarboxylase proenzyme S-adenosylmethionine decarboxylase alpha chain S-adenosylmethionine decarboxylase beta chain
GRMZM2G051792	cluster2	9.74468	9.35155	15.226	16.9926	23.6769	26.1628	NA	Uncharacterized protein
GRMZM2G002075	cluster2	3.06139	2.6308	4.18524	6.54935	7.39509	9.68481	bzip123	BZIP transcription factor; Uncharacterized protein
GRMZM2G081114	cluster2	1.00558	3.451	4.15492	11.5446	2.49396	8.3894	NA	Uncharacterized protein
GRMZM2G475017	cluster2	7.83098	8.69266	10.3507	14.6154	19.6298	19.3924	c3h23	Uncharacterized protein
GRMZM2G050407	cluster2	0.730753	0.83628	1.25592	1.35894	1.8475	1.53989	NA	Uncharacterized protein
GRMZM2G047476	cluster2	0.553381	0.77423	1.06211	0.997824	1.41791	1.7058	NA	Uncharacterized protein
GRMZM2G141383	cluster2	5.33724	3.25474	7.87959	9.93622	13.8646	12.3026	yuc4	NA
GRMZM2G030350	cluster2	1.32706	2.18136	2.03554	2.44212	3.47845	2.34421	NA	Uncharacterized protein
GRMZM2G090411	cluster2	1.95124	2.40045	3.16798	2.63692	5.28207	2.42618	NA	NA
GRMZM2G084463	cluster2	13.9635	21.4854	25.2375	27.8354	39.2282	34.7033	NA	Guanylate kinase; Uncharacterized protein
GRMZM2G026807	cluster2	4.36741	11.9003	9.62778	12.2599	12.3286	13.1948	rpe1	Ribulose-phosphate 3-epimerase
GRMZM2G409104	cluster2	10.6129	12.8921	16.1697	20.8951	30.072	31.614	NA	Uncharacterized protein
GRMZM2G061884	cluster2	0.570892	1.04578	1.12873	0.962545	1.61034	1.32899	NA	Uncharacterized protein
GRMZM2G044898	cluster2	0.25321	0.329138	0.531162	0.576866	0.764727	0.605126	NA	NA
GRMZM5G894518	cluster2	0.765348	1.03223	0.960066	1.45886	2.27531	1.90798	NA	NA
GRMZM2G064473	cluster2	23.3308	40.8611	37.2139	76.9918	82.5252	88.9154	NA	Plastidic ATP/ADP-transporter
GRMZM2G107639	cluster2	11.1713	35.0915	21.912	36.0166	39.7345	34.9456	NA	Transaminase/ transferase isoform 1; Transaminase/ transferase isoform 2; Transaminase/ transferase; transferring nitrogenous groups
GRMZM2G302074	cluster2	0.840433	1.0627	4.97277	13.3269	3.35699	13.7128	NA	Putative cytochrome P450 superfamily protein
GRMZM2G101745	cluster2	0.176748	0.478961	0.550115	0.49833	1.12343	0.86678	NA	NA
GRMZM2G372495	cluster2	1.45229	1.97585	5.51284	9.5705	11.8471	15.3875	NA	NA
GRMZM2G343854	cluster2	0.78929	3.35235	5.09438	5.76092	7.22419	11.018	NA	NA
GRMZM2G447271	cluster2	0.140554	0.656764	1.4534	1.79638	1.70387	1.91948	NA	Putative laccase family protein
GRMZM2G336557	cluster2	0.204846	0.53656	1.12446	1.74304	3.14086	2.03118	NA	Uncharacterized protein
GRMZM2G702980	cluster2	0	0.336946	0.561758	0.581926	1.00828	0.741083	NA	NA
GRMZM2G479804	cluster2	0.180109	0.541091	1.39951	2.946	5.24559	4.60475	NA	Uncharacterized protein
GRMZM2G424112	cluster2	0.0481887	0.332289	0.374011	1.45771	1.9059	2.36983	NA	Uncharacterized protein
GRMZM5G894582	cluster2	0.366247	2.87404	7.38092	9.55102	17.2214	20.8783	NA	Uncharacterized protein
GRMZM2G307119	cluster2	0.0385834	0.669329	1.77587	3.4482	6.36983	5.0226	bd1	Uncharacterized protein
GRMZM2G152278	cluster2	5.75406	6.93806	8.32059	10.1827	10.2902	11.5687	NA	Uncharacterized protein
GRMZM2G130889	cluster2	12.2353	16.5856	22.5138	19.7303	23.248	24.5587	NA	Uncharacterized protein
GRMZM2G075132	cluster2	5.07069	4.77032	7.7588	8.60844	9.27462	10.1767	NA	Uncharacterized protein
GRMZM2G150374	cluster2	6.43637	8.58399	11.3773	10.9855	12.246	12.9479	NA	NA
GRMZM2G113911	cluster2	5.64034	5.06757	7.58867	8.42274	10.3182	11.3042	NA	Putative uncharacterized protein
GRMZM2G006297	cluster2	5.90196	5.93392	6.95687	9.16832	11.3141	11.8747	NA	Uncharacterized protein
GRMZM2G110584	cluster2	1.61692	1.92773	2.54695	2.90513	3.15587	3.30034	NA	Uncharacterized protein
GRMZM2G097768	cluster2	15.235	17.9166	17.4634	26.0466	27.6656	30.8295	stp1	Sugar transport1 isoform 1; Sugar transport1 isoform 2; Sugar transporter protein ERD6-L; Uncharacterized protein
GRMZM2G008726	cluster2	3.70307	4.44683	4.95282	5.60126	7.03409	7.49791	NA	Putative uncharacterized protein
GRMZM2G006964	cluster2	5.53158	0.894711	7.46537	8.23498	5.03522	11.1768	ga2ox2	Uncharacterized protein
GRMZM2G111200	cluster2	2.26619	2.6862	3.27563	4.42568	3.14373	4.57726	NA	Uncharacterized protein
GRMZM2G141941	cluster2	4.97077	6.09241	7.46086	9.29844	9.61157	10.0329	NA	Uncharacterized protein
GRMZM2G116700	cluster2	6.40999	6.20365	8.622	10.8989	11.3768	13.0922	atg18f	NA
GRMZM2G366873	cluster2	7.18502	5.53171	8.91547	10.3928	9.12841	14.7097	NA	Uncharacterized protein
GRMZM2G053303	cluster2	1.47455	1.41309	1.99466	2.52828	2.63704	2.99284	NA	NA
GRMZM2G009804	cluster2	6.01459	6.19744	8.66127	11.2095	9.22276	12.3156	NA	NA
GRMZM2G072658	cluster2	5.0119	5.73282	8.02737	7.5246	7.82091	10.2769	pza02462	NA
GRMZM2G125494	cluster2	9.53579	11.8425	15.6708	17.0618	17.814	19.6191	pza02337	Uncharacterized protein
GRMZM2G164160	cluster2	4.10119	5.18483	6.32417	6.84638	8.13015	8.4929	atg1c	Uncharacterized protein
GRMZM2G001024	cluster2	12.0366	9.70826	14.4369	19.9394	21.5077	24.7681	NA	Putative RING/U-box superfamily protein isoform 1; Putative RING/U-box superfamily protein isoform 2; Putative RING/U-box superfamily protein isoform 3; Uncharacterized protein
GRMZM2G179308	cluster2	24.3879	34.6016	34.7047	45.9802	48.4086	50.4312	AY111089	Uncharacterized protein
AC199526.5_FG002	cluster2	399.535	683.554	478.73	709.033	674.847	825.135	NA	Uncharacterized protein
GRMZM2G467338	cluster2	8.94662	14.0128	14.9211	16.7284	16.6084	18.4433	NA	Uncharacterized protein
GRMZM2G044337	cluster2	14.7639	30.2244	22.2768	23.6788	25.162	30.4904	NA	Uncharacterized protein
GRMZM2G453832	cluster2	2.71877	2.9194	3.60772	4.88516	5.00271	5.6167	mgt6	NA
GRMZM2G160316	cluster2	39.0768	40.6669	56.9217	72.1735	76.9735	81.089	NA	NA
GRMZM2G108546	cluster2	8.82625	8.61954	11.2767	15.8554	14.5706	18.3238	NA	Putative uncharacterized protein
GRMZM2G404897	cluster2	8.01569	8.82721	9.80507	14.698	14.0053	16.803	NA	Zinc finger protein; Zinc finger protein isoform 1; Zinc finger protein isoform 2
AC149829.2_FG006	cluster2	33.1377	41.0155	53.8824	56.7547	61.4394	69.3378	NA	Uncharacterized protein
GRMZM2G002361	cluster2	15.1993	20.1916	28.3672	26.6403	28.7161	31.8085	NA	Uncharacterized protein
GRMZM2G106795	cluster2	2.93366	5.24589	3.84644	5.08697	5.10038	6.15069	NA	ADP-ribosylation factor; Uncharacterized protein
GRMZM2G331902	cluster2	3.66694	3.41807	4.49562	5.85455	6.04046	7.62645	NA	Uncharacterized protein
GRMZM2G173680	cluster2	4.87695	6.59084	7.45222	9.72292	9.63652	10.2894	wrky110	Uncharacterized protein
GRMZM2G054350	cluster2	5.74059	6.35062	8.9959	8.7988	11.182	12.3002	NA	NA
GRMZM2G139931	cluster2	7.184	9.32615	11.995	13.4823	14.0219	15.3939	NA	Uncharacterized protein
GRMZM2G046824	cluster2	11.3289	12.8305	16.2565	19.3028	22.2564	24.3115	NA	Uncharacterized protein
GRMZM2G323353	cluster2	2.89416	2.25881	4.42562	4.70282	4.05557	6.24964	NA	Uncharacterized protein
GRMZM2G101004	cluster2	14.7249	16.9046	20.9508	28.8403	27.0034	31.6456	elm2	Heme oxygenase 1; Uncharacterized protein
GRMZM2G066293	cluster2	7.0847	12.709	12.5569	12.7882	13.2715	15.2832	NA	ATPase
GRMZM2G114570	cluster2	11.0406	6.8749	17.0767	19.7253	20.3219	23.8064	NA	Uncharacterized protein
GRMZM2G007185	cluster2	3.56239	3.79781	5.77242	6.61815	6.41894	7.75672	NA	Uncharacterized protein
AC234171.1_FG003	cluster2	14.2457	21.65	21.7526	26.011	26.1078	30.9513	NA	Uncharacterized protein
GRMZM2G154394	cluster2	5.07883	6.06749	8.71246	7.71727	8.61798	11.0327	NA	Uncharacterized protein
GRMZM2G138423	cluster2	1.94698	3.40224	3.42807	3.58338	3.21064	4.27062	NA	ADP;ATP carrier protein
GRMZM2G092182	cluster2	4.00273	7.61302	6.7939	7.41488	8.83692	8.74759	NA	Uncharacterized protein
GRMZM5G836378	cluster2	6.4635	5.72115	8.22165	9.91116	9.42755	14.2344	NA	Protein SUR2
GRMZM2G163193	cluster2	7.37582	8.2419	11.5684	13.125	13.8339	16.3096	NA	Uncharacterized protein
GRMZM2G071059	cluster2	15.2309	26.8809	27.7254	24.2504	26.8183	33.6182	NA	CCR4-NOT transcription complex subunit 7; Uncharacterized protein
GRMZM2G106218	cluster2	2.65352	3.83989	4.7648	4.57232	4.7085	5.84852	AW036917	Uncharacterized protein
GRMZM2G048567	cluster2	1.68908	2.64978	2.61054	3.67751	2.91919	3.75592	NA	Uncharacterized protein
GRMZM2G163813	cluster2	1.10245	1.99265	1.76839	2.4558	2.59536	2.45575	sbp19	Squamosa promoter-binding protein-like (SBP domain) transcription factor family protein; Uncharacterized protein
GRMZM2G160585	cluster2	20.6418	19.0648	26.8885	37.0732	39.8037	46.3645	NA	Glycosyltransferase
GRMZM2G001180	cluster2	8.18814	8.81188	11.2181	12.8618	14.9859	18.5188	NA	Uncharacterized protein
GRMZM2G157836	cluster2	9.2597	12.0849	13.4287	16.5992	17.3452	20.9742	NA	Adenylyltransferase and sulfurtransferase MOCS3 2 Molybdopterin-synthase adenylyltransferase Molybdopterin-synthase sulfurtransferase
GRMZM2G162798	cluster2	3.4546	3.38786	4.0685	6.37201	6.69175	7.82998	NA	Uncharacterized protein
GRMZM2G160556	cluster2	7.49017	12.5308	12.9441	13.3847	14.9211	17.0421	NA	Arginyl-tRNA--protein transferase 1
GRMZM2G146614	cluster2	17.1154	13.4592	31.002	28.7426	19.2243	38.9391	NA	B-box zinc finger family protein
GRMZM2G312434	cluster2	0.747285	0.842707	1.04706	1.41656	1.33044	1.73524	NA	NA
GRMZM2G147856	cluster2	22.3488	23.613	40.898	39.6136	42.4157	51.2757	NA	Uncharacterized protein
GRMZM5G873277	cluster2	13.3298	15.8588	22.0905	25.1991	25.6086	30.5818	NA	NA
GRMZM2G024823	cluster2	20.5215	40.2093	25.238	37.957	37.7469	47.9796	uaz282	Uncharacterized protein
GRMZM2G104269	cluster2	1.79319	1.04976	1.65914	3.1163	2.16099	4.27355	NA	Uncharacterized protein
GRMZM2G136918	cluster2	9.96576	12.2451	16.6628	14.8958	19.6469	23.652	NA	Uncharacterized protein
GRMZM2G125531	cluster2	13.404	22.0381	21.7134	26.4575	29.8418	32.2987	NA	Uncharacterized protein
GRMZM2G478417	cluster2	11.943	8.36909	13.45	22.8339	20.7874	28.837	bzip49	NA
GRMZM5G831993	cluster2	54.2018	46.5674	72.188	89.2346	105.394	131.126	NA	Uncharacterized protein
GRMZM2G178756	cluster2	15.9532	11.5714	22.0584	26.6236	31.5541	39.3368	cdpk14	Calcium-dependent protein kinase; isoform AK1; Putative calcium-dependent protein kinase family protein; Uncharacterized protein
GRMZM2G167387	cluster2	6.66527	7.49831	13.1966	11.6142	11.5953	16.713	NA	Uncharacterized protein
GRMZM2G163154	cluster2	0.341333	0.315309	0.557206	0.834661	0.705975	0.876392	mate3	Uncharacterized protein
GRMZM2G466908	cluster2	1.91769	2.64082	3.44502	3.76269	4.4296	4.82256	saur1	Putative uncharacterized protein saur1; Uncharacterized protein
GRMZM2G005652	cluster2	6.02728	8.35897	7.7019	11.4312	11.0119	16.1136	umc1396	NA
GRMZM2G050085	cluster2	0.348506	0.226501	0.675942	0.746332	0.899827	1.0725	NA	NA
GRMZM2G143723	cluster2	2.1451	4.11314	4.82567	6.20001	6.23603	6.93317	NA	NA
GRMZM2G056270	cluster2	28.0499	43.0024	81.4735	79.6198	87.4637	95.5111	NA	Putative RING zinc finger domain superfamily protein; RING finger and CHY zinc finger domain-containing protein 1; Uncharacterized protein
GRMZM2G098099	cluster2	0.300331	0.23442	0.923737	0.701612	0.831498	1.05873	NA	NA
AC194176.3_FG002	cluster2	0.337651	0.2613	0.730032	0.784944	1.16644	1.41103	NA	NA
GRMZM2G114325	cluster2	0.976728	2.08503	2.58778	3.28439	5.14017	4.46491	NA	Putative RNA recognition motif containing family protein; Uncharacterized protein
GRMZM2G142777	cluster2	4.45293	20.6975	15.4495	23.799	30.6691	20.7691	NA	Uncharacterized protein
GRMZM2G103227	cluster2	0.343668	0.112459	0.450212	1.13775	0.635967	1.54443	NA	Uncharacterized protein
GRMZM5G878561	cluster2	2.69901	9.86491	10.8006	12.191	13.6286	13.5411	sbp22	NA
GRMZM2G164134	cluster2	3.76079	8.0472	16.8144	20.0649	22.4735	19.5278	NA	Carboxylic ester hydrolase
GRMZM2G045319	cluster2	3.11653	5.55609	6.76372	11.3218	14.6303	16.4776	NA	NA
GRMZM2G037998	cluster2	0.687835	5.80777	1.2704	3.50847	3.26778	4.21021	NA	Uncharacterized protein
GRMZM2G463996	cluster2	0.201075	0.413951	0.969363	1.50984	1.2951	1.49254	NA	NA
GRMZM2G012498	cluster2	1.25936	7.51802	7.08769	5.65393	9.76044	10.4502	NA	Uncharacterized protein
GRMZM2G137426	cluster2	0.520691	3.62254	3.20785	4.15026	6.20131	5.61729	NA	NA
GRMZM2G468740	cluster2	0.0716437	0.692282	0.585904	0.834869	1.20122	1.48139	NA	Protein yippee-like
GRMZM2G000483	cluster2	0.0121039	1.80196	0.522664	0.980483	1.06077	1.19026	NA	Uncharacterized protein
GRMZM2G046609	cluster3	0.0710817	0.279937	5.40372	22.0798	36.0462	41.9031	NA	NA
GRMZM2G106276	cluster3	2.04227	7.3033	21.0252	37.912	59.1267	85.4241	hb4	Putative homeobox DNA-binding and leucine zipper domain family protein
GRMZM2G156877	cluster3	39.1519	136.72	37.8854	67.3968	108.796	126.439	gst8	Glutathione S-transferase IV; Uncharacterized protein
GRMZM2G096171	cluster3	0.557681	1.75142	3.20117	3.14389	7.54925	13.3811	crr7	Response regulator 7; Uncharacterized protein
GRMZM2G042538	cluster3	1.9374	5.81021	6.28262	4.30584	3.79895	10.0695	NA	NA
GRMZM2G070271	cluster3	0.566468	1.68441	1.46405	2.73931	3.19135	5.58118	umc2230	NA
GRMZM2G084609	cluster3	0.273523	0.780607	2.19779	5.90335	10.6521	11.9228	NA	NA
GRMZM2G496448	cluster3	0.52048	1.4063	0.795861	0.969517	0.700587	1.40168	NA	Uncharacterized protein
GRMZM2G128466	cluster3	2.84416	7.50057	2.36271	3.73137	4.78285	7.29799	NA	NADPH quinone oxidoreductase 2; Uncharacterized protein
GRMZM2G032955	cluster3	2.02628	5.28001	4.45356	3.15524	4.13752	6.42424	NA	Prenylated rab acceptor family protein
GRMZM2G004356	cluster3	0.214059	0.539345	0.726832	0.911256	1.50413	2.12231	bhlh159	BHLH transcription factor
GRMZM2G176595	cluster3	3.01676	7.47558	108.812	513.906	885.512	1204.07	expb6	Beta-expansin 1a; Beta-expansin 6; Uncharacterized protein
GRMZM2G046061	cluster3	5.36475	12.3863	6.77127	7.18651	9.9669	12.952	NA	DNA-directed RNA polymerase subunit
GRMZM2G013398	cluster3	0.431751	1.00374	0.59731	0.735486	3.03632	1.14545	col6	Uncharacterized protein
GRMZM2G159581	cluster3	0.577015	1.27584	1.03614	0.935093	0.929982	1.49386	NA	NA
GRMZM2G093325	cluster3	56.6179	124.342	92.2115	69.2936	90.7481	207.031	NA	Uncharacterized protein
AC207628.4_FG010	cluster3	2.21695	4.85126	3.56021	3.29148	2.71356	5.38815	NA	Uncharacterized protein
GRMZM2G429617	cluster3	3.37307	7.22055	3.40827	4.95169	22.8543	76.075	NA	Uncharacterized protein
GRMZM2G027794	cluster3	0.569771	1.20947	3.43238	5.09713	8.81773	18.4385	NA	Uncharacterized protein
GRMZM2G099740	cluster3	2.37655	4.88307	3.12027	6.08805	7.19838	8.68437	NA	Uncharacterized protein
GRMZM2G148387	cluster3	14.7278	30.298	17.0998	20.0909	18.0619	41.3582	NA	Grx_C2.1-glutaredoxin subgroup I
GRMZM2G130119	cluster3	5.55165	11.2939	4.6841	7.41005	13.7757	17.9306	NA	Uncharacterized protein
GRMZM2G126541	cluster3	16.4837	33.0408	31.7803	31.1996	36.207	58.4875	NA	Uncharacterized protein
GRMZM2G441906	cluster3	67.3948	33.6128	38.199	47.2221	84.7905	98.7138	NA	Grx_A2-glutaredoxin subgroup III
GRMZM2G479987	cluster3	4.4665	2.20859	5.2991	4.58757	6.67594	8.52004	NA	Uncharacterized protein
GRMZM2G073310	cluster3	42.7314	21.1646	18.7152	14.548	53.0088	47.9617	NA	Uncharacterized protein
GRMZM2G053987	cluster3	62.6032	30.9034	23.6255	44.3188	101.238	72.019	mpk1	Putative MAP kinase family protein isoform 1; Putative MAP kinase family protein isoform 2; Uncharacterized protein
GRMZM2G162702	cluster3	21.5927	10.5754	14.3921	20.6011	25.9032	29.5533	NA	Uncharacterized protein
GRMZM2G445163	cluster3	8.76154	4.27774	5.3775	6.71609	7.88118	8.52746	NA	Uncharacterized protein
GRMZM2G092101	cluster3	7.89909	3.87294	3.55373	6.28224	8.05258	9.30935	NA	Uncharacterized protein
GRMZM2G081359	cluster3	7.59908	3.67539	4.64147	5.45872	7.34453	9.09623	NA	Uncharacterized protein
GRMZM2G480607	cluster3	10.4858	5.07502	5.40999	8.0084	11.3433	10.5277	NA	Uncharacterized protein
GRMZM2G165426	cluster3	22.0879	10.677	15.5043	21.5173	28.9095	30.407	NA	Putative PHD zinc finger and DUF1423 domain containing family protein; Uncharacterized protein
GRMZM2G168364	cluster3	51.5156	24.8866	25.6413	41.4966	48.024	58.4119	pza01714	Endochitinase A2; Uncharacterized protein
GRMZM2G146866	cluster3	6.4699	3.11791	1.29474	4.27615	9.20658	9.23377	NA	NA
GRMZM2G077187	cluster3	11.217	5.38832	3.10071	5.78782	32.3677	21.1874	NA	Uncharacterized protein
GRMZM2G449681	cluster3	98.4616	46.9721	45.8084	76.2825	113.155	96.5998	wrky92	Putative WRKY DNA-binding domain superfamily protein isoform 1; Putative WRKY DNA-binding domain superfamily protein isoform 2
GRMZM2G169398	cluster3	16.202	7.70855	7.45484	14.1092	14.7608	17.0759	NA	Transposon protein Mutator sub-class
GRMZM2G180211	cluster3	6.06634	2.88942	2.06018	5.45417	13.433	10.5085	NA	NA
GRMZM2G004835	cluster3	13.1	6.20781	6.51021	9.39508	12.4259	13.1368	NA	Esterase; Uncharacterized protein
GRMZM2G083402	cluster3	0.902628	0.437272	0.680289	0.579107	1.03503	0.972248	NA	Uncharacterized protein
GRMZM5G882708	cluster3	6.61079	3.12815	6.0605	10.8929	26.0337	31.3621	NA	Uncharacterized protein
GRMZM2G023204	cluster3	24.874	11.7115	9.60865	10.4203	27.3113	20.4821	NA	NA
GRMZM2G150806	cluster3	24.7495	11.6414	14.6395	17.3905	24.7799	24.5675	NA	Uncharacterized protein
GRMZM2G157679	cluster3	18.2917	8.60527	11.5416	16.4254	22.0033	22.2835	gras23	Uncharacterized protein
GRMZM2G369445	cluster3	3.17567	1.50406	2.0313	2.53477	2.84905	4.29183	NA	NA
GRMZM2G389362	cluster3	34.5575	16.139	20.3581	27.5696	28.4635	34.1054	NA	NA
GRMZM5G813206	cluster3	15.5559	7.26211	9.23586	12.3235	17.4672	16.7825	NA	Uncharacterized protein
GRMZM2G070279	cluster3	20.9595	9.70318	3.74316	8.5339	31.5161	22.5081	NA	Uncharacterized protein
GRMZM2G026580	cluster3	1.5791	0.71877	0.960517	1.94951	3.18769	3.12031	NA	Uncharacterized protein
GRMZM2G392116	cluster3	29.9299	13.6638	20.6886	18.1168	52.8352	70.2087	NA	Uncharacterized protein
GRMZM2G033138	cluster3	21.1179	9.58369	12.3522	12.9223	19.6022	23.0405	hb28	Putative uncharacterized protein
GRMZM2G176995	cluster3	5.38188	2.44095	2.02221	2.05767	5.5427	4.68206	NA	Uncharacterized protein
GRMZM2G044557	cluster3	14.1613	6.38962	9.66006	10.1918	15.5383	12.7057	NA	Uncharacterized protein
GRMZM2G121996	cluster3	10.9978	4.90513	6.49946	10.7189	14.4824	13.6976	NA	NA
GRMZM2G030567	cluster3	1.99175	0.874953	1.86242	1.82195	3.27016	3.18101	NA	NA
GRMZM2G463983	cluster3	1.77476	0.780398	1.65056	1.62934	1.36903	2.08093	NA	Uncharacterized protein
GRMZM2G017013	cluster3	40.2604	17.8001	18.0814	32.8446	50.3101	53.2692	NA	Protein binding protein
GRMZM5G813532	cluster3	7.29713	3.17458	1.83073	5.03256	8.6029	7.89558	NA	NA
GRMZM2G090584	cluster3	96.8096	42.4751	29.486	59.7116	98.9493	89.1789	NA	Uncharacterized protein
GRMZM2G127224	cluster3	1.43491	0.62583	0.51457	0.547269	1.33064	1.65034	NA	Uncharacterized protein
GRMZM2G453349	cluster3	2.15676	0.931053	1.20233	2.32863	5.62956	5.28469	NA	Uncharacterized protein
GRMZM2G006071	cluster3	61.3557	26.814	39.2174	35.2767	67.073	64.0474	NA	NA
GRMZM2G055216	cluster3	47.9557	20.9468	27.8565	34.5897	67.8673	62.5599	NA	Uncharacterized protein
GRMZM2G005522	cluster3	3.79024	1.63273	1.66422	2.89078	4.38851	4.15146	NA	Uncharacterized protein
GRMZM2G393337	cluster3	20.7057	8.94638	16.8461	13.3451	21.5554	22.6194	NA	Uncharacterized protein
GRMZM2G031143	cluster3	3.7582	1.57951	1.65912	2.50548	3.70626	5.60046	NA	Uncharacterized protein
GRMZM2G121565	cluster3	8.99116	3.82972	2.93996	6.18102	19.6048	9.51904	NA	Putative leucine-rich repeat transmembrane protein kinase family protein; Uncharacterized protein
GRMZM2G393471	cluster3	6.78692	2.87756	3.12444	6.14697	11.7959	9.97931	NA	Uncharacterized protein
GRMZM2G004949	cluster3	11.8551	5.0432	8.80666	20.2413	27.1979	34.1628	NA	NA
GRMZM2G031624	cluster3	11.5853	4.88105	1.18634	3.72086	21.1185	14.2587	NA	Uncharacterized protein
AC207628.4_FG009	cluster3	6.73584	2.80897	3.10188	14.0861	19.7696	27.5701	NA	NA
GRMZM2G441541	cluster3	37.3985	15.7301	6.48965	18.9999	53.0761	52.9112	rboh4	Respiratory burst oxidase protein D variant alpha
GRMZM2G159700	cluster3	5.59569	2.35806	2.99693	3.12795	8.56474	7.77632	NA	Uncharacterized protein
GRMZM2G160606	cluster3	2.72606	1.12457	0.718785	3.05241	7.95166	7.57177	NA	NA
GRMZM2G024345	cluster3	6.35217	2.62716	8.07188	4.69794	11.4472	18.8461	NA	Putative uncharacterized protein
GRMZM2G058305	cluster3	21.4426	8.39675	10.0762	21.055	36.3574	32.6535	NA	Putative calcium-dependent protein kinase family protein
GRMZM2G007404	cluster3	23.1077	8.94589	12.2968	31.0332	41.2924	49.0522	NA	Uncharacterized protein
GRMZM2G314396	cluster3	3.37411	1.27678	1.69363	5.28827	16.2514	9.77289	cdpk5	Uncharacterized protein
GRMZM2G049950	cluster3	1.66581	0.629153	0.507035	1.71061	2.56463	2.64142	NA	Uncharacterized protein
GRMZM2G103013	cluster3	3.80884	1.35693	3.38125	3.07441	3.92666	7.96113	NA	Uncharacterized protein
GRMZM2G389645	cluster3	1.93797	0.688338	0.877061	1.58088	1.52876	2.03338	NA	Pentatricopeptide repeat protein
GRMZM2G164672	cluster3	1.23362	0.429311	0.845104	2.1801	2.34554	3.26044	NA	NA
GRMZM2G057779	cluster3	2.5459	0.873675	1.21208	6.38039	11.4686	11.599	NA	Uncharacterized protein
GRMZM2G384755	cluster3	1.28259	0.419439	0.459449	0.631711	1.38377	2.1593	NA	Uncharacterized protein
GRMZM2G045638	cluster3	3.08623	0.986076	0.549688	0.743793	2.15048	5.08015	NA	Uncharacterized protein
GRMZM2G017739	cluster3	1.46268	0.463407	0.619342	0.740886	2.66681	1.68404	NA	Uncharacterized protein
GRMZM2G090929	cluster3	3.54468	1.10549	2.51669	4.3018	3.52142	6.25983	NA	NA
GRMZM2G152793	cluster3	0.6293	0.189041	0.556929	1.81102	3.16359	3.25218	NA	Uncharacterized protein
GRMZM2G085836	cluster3	1.09367	0.310609	0.725458	0.500378	1.17079	0.876269	NA	Uncharacterized protein
GRMZM2G164074	cluster3	18.7607	5.01251	3.88441	4.38905	23.2458	19.8805	NA	Cytochrome P450 CYP94B12; Uncharacterized protein
GRMZM2G019806	cluster3	1.04112	0.243999	0.487552	4.09636	23.1992	19.0504	bhlh137	Uncharacterized protein
GRMZM2G091956	cluster3	0.714496	0.141004	0.0932852	0.730461	1.6558	3.24689	NA	NA
GRMZM5G892495	cluster3	0.784919	0.154729	0.949761	4.14249	6.12379	7.26524	NA	NA
GRMZM2G168020	cluster3	1.22775	0.191383	0.422067	0.387529	1.23571	1.95798	NA	NA
GRMZM2G496991	cluster3	25.0161	2.65839	2.66924	2.41956	41.4419	32.2611	NA	NA
GRMZM2G420108	cluster3	39.2323	204.395	79.4694	63.3262	121.732	196.818	NA	NA
GRMZM2G148930	cluster3	4.6749	2.18083	9.55565	110.318	318.97	478.445	NA	Uncharacterized protein
GRMZM2G054125	cluster3	2.48276	7.77826	5.11818	3.57438	6.18986	9.7062	wrky36	Putative WRKY DNA-binding domain superfamily protein
GRMZM5G882758	cluster3	0.628934	0.497896	1.28784	1.79115	2.2909	3.49654	NA	Uncharacterized protein
GRMZM2G067402	cluster3	214.299	1006	444.171	502.376	707.988	844.509	hb1	Non-symbiotic hemoglobin
GRMZM2G124540	cluster3	24.2499	44.6732	50.7969	58.8576	79.3011	114.938	glk44	DNA binding protein
GRMZM2G060918	cluster3	6.3571	8.47567	13.682	21.6836	13.8939	45.4607	wrky65	Putative WRKY DNA-binding domain superfamily protein
GRMZM2G124175	cluster3	8.23291	14.206	17.8738	49.7309	97.5481	108.537	NA	NA
GRMZM2G134545	cluster3	4.44043	7.5694	9.63479	8.60433	13.5036	16.9072	dof14	NA
GRMZM2G365677	cluster3	5.78778	5.98352	12.6086	14.1676	20.3662	26.4272	NA	F-box protein interaction domain containing protein
GRMZM2G309380	cluster3	4.65085	8.41377	10.1692	11.9391	17.2649	25.0547	NA	NA
GRMZM2G029856	cluster3	16.1316	22.7577	35.7929	100.101	268.074	427.599	NA	GDP-L-fucose synthase 1
GRMZM2G009719	cluster3	39.903	111.985	88.7245	72.3038	149.6	246.352	NA	Uncharacterized protein; Universal stress protein
AC204711.3_FG003	cluster3	15.9326	27.9414	35.4568	33.0089	60.352	91.5453	NA	Uncharacterized protein
GRMZM2G044576	cluster3	1.33845	1.07327	3.0342	6.99041	8.61823	14.5991	gata13	Putative GATA transcription factor family protein
GRMZM2G133781	cluster3	40.3136	290.218	91.8944	169.112	322.711	411.513	NA	Uncharacterized protein
GRMZM5G804323	cluster3	0.517032	0.950756	1.19002	1.19103	2.57505	5.84519	NA	Oxygen-evolving enhancer protein 3-1
AC208897.3_FG004	cluster3	4.77969	24.8615	11.049	38.4578	92.6795	129.519	NA	NA
GRMZM2G129114	cluster3	2.01815	8.93574	4.68955	12.2322	14.581	20.9973	NA	Uncharacterized protein
GRMZM6G056015	cluster3	1.28432	8.67973	2.95947	4.6552	5.05068	7.80507	NA	Seven-transmembrane-domain protein 1; Uncharacterized protein
GRMZM2G472266	cluster3	3.74103	10.1302	8.72265	6.29654	6.62783	13.2307	NA	Uncharacterized protein
GRMZM2G128929	cluster3	8.77876	37.0783	20.7618	22.2784	42.8485	52.207	ldh1	L-lactate dehydrogenase
GRMZM5G882078	cluster3	2.84955	2.45289	6.74956	14.7181	28.9598	29.0889	NA	Uncharacterized protein
GRMZM2G087507	cluster3	0.734635	0.580779	1.77724	0.994411	0.545088	6.12588	NA	Aldose reductase
GRMZM2G176489	cluster3	1.81901	8.08226	4.33641	12.1053	41.5532	29.8295	wrky56	NA
GRMZM2G405503	cluster3	1.40694	0.913885	3.37796	11.4848	16.7357	28.031	NA	Uncharacterized protein
GRMZM2G128179	cluster3	5.07983	7.09282	12.4157	15.0577	27.3938	29.0309	NA	Uncharacterized protein
GRMZM2G128992	cluster3	0.233308	0.387105	0.584921	1.64641	2.87807	3.15558	NA	Uncharacterized protein
GRMZM2G440313	cluster3	2.59234	6.02996	6.41052	4.89114	5.7353	9.65483	NA	Uncharacterized protein
GRMZM2G323415	cluster3	1.22289	0.270406	3.01771	4.6868	13.089	10.6375	NA	Uncharacterized protein
GRMZM2G390896	cluster3	0.189103	0.402756	0.451094	1.43181	3.3783	4.16661	NA	Putative CBL-interacting protein kinase family protein; Uncharacterized protein
GRMZM2G174048	cluster3	0.566369	0.478425	1.40093	3.47109	6.53319	6.0013	NA	Copper ion binding protein
GRMZM2G156684	cluster3	1.25587	1.66233	3.17552	10.198	20.3905	30.1074	NA	Uncharacterized protein
GRMZM5G812228	cluster3	4.15813	16.8493	10.5681	23.8198	37.3011	46.4824	NA	ACS-like protein; Putative AMP-dependent synthetase and ligase superfamily protein
GRMZM2G467640	cluster3	1.87392	4.3216	4.76414	4.75485	7.66664	8.88793	NA	Uncharacterized protein
GRMZM2G075002	cluster3	1.82821	2.95197	4.70134	10.1431	27.0875	30.6386	NA	CBL-interacting serine/threonine-protein kinase 1
GRMZM2G391815	cluster3	3.90823	6.92761	10.1636	24.3372	47.4929	84.072	NA	NA
AC190933.3_FG004	cluster3	2.60267	10.1587	6.79288	5.87878	24.6621	37.5033	NA	NA
GRMZM2G157027	cluster3	5.94789	14.3913	15.5527	35.6953	81.3668	101.252	NA	Uncharacterized protein
GRMZM2G104730	cluster3	0.496159	0.931019	1.33269	4.13852	6.55714	9.23341	NA	Uncharacterized protein
GRMZM2G128644	cluster3	0.45367	0.454208	1.22225	2.40025	3.83952	5.29355	NA	Uncharacterized protein; VQ motif family protein
GRMZM5G896260	cluster3	15.8466	70.3415	42.8433	30.5145	43.6984	76.3603	NA	Indole-3-acetate beta-glucosyltransferase
GRMZM2G443819	cluster3	0.286694	0.814597	0.804467	5.73196	11.9543	14.898	NA	Uncharacterized protein
GRMZM2G131421	cluster3	19.8533	93.8465	54.677	32.7912	74.6166	165.731	NA	Early nodulin 93
GRMZM2G300965	cluster3	19.8102	47.5532	54.6333	50.5521	107.539	133.882	NA	Uncharacterized protein
GRMZM2G155499	cluster3	0.353543	0.175379	0.9771	2.08827	4.01619	6.1491	NA	Putative HLH DNA-binding domain superfamily protein isoform 1; Putative HLH DNA-binding domain superfamily protein isoform 2; Uncharacterized protein
GRMZM2G359986	cluster3	5.89657	23.5185	16.6164	17.6596	31.8479	41.6767	NA	Putative WAK-related receptor-like protein kinase family protein; Uncharacterized protein
GRMZM2G065083	cluster3	54.255	143.45	153.694	121.606	168.398	268.989	phi1	NA
GRMZM2G478396	cluster3	0.427445	0.419164	1.21436	2.2396	4.76074	7.47922	wox5a	Putative homeobox DNA-binding domain superfamily protein
GRMZM2G138683	cluster3	0.23377	0.338136	0.729218	4.62716	12.3939	16.2588	wrky11	Putative WRKY DNA-binding domain superfamily protein; Uncharacterized protein
GRMZM2G362410	cluster3	0.338298	1.46465	1.02298	4.81449	9.80736	8.74011	NA	Uncharacterized protein
GRMZM5G852704	cluster3	1.40298	4.83353	4.25353	5.01135	5.90868	10.8691	ereb31	Putative AP2/EREBP transcription factor superfamily protein
GRMZM2G075459	cluster3	15.6542	78.458	47.901	25.8748	70.2518	100.379	NA	NA
GRMZM2G428216	cluster3	17.6394	110.272	55.5665	31.9296	49.3868	140.589	umc2233	Putative uncharacterized protein
GRMZM2G500685	cluster3	0.473613	0.977972	1.5092	0.528255	2.00245	1.73946	NA	Uncharacterized protein
GRMZM5G805732	cluster3	1.02051	3.63037	3.22233	11.3753	22.8583	40.2849	NA	Uncharacterized protein
AC204515.4_FG006	cluster3	0.237016	1.40443	0.784075	1.49974	2.53026	3.73631	NA	Uncharacterized protein
GRMZM2G451097	cluster3	0.108647	0.0291516	0.385041	8.17828	36.8671	36.8037	NA	NA
GRMZM2G012758	cluster3	2.14585	4.15285	7.39361	17.7213	33.5444	37.4687	NA	Glucan endo-1;3-beta-glucosidase 7; Uncharacterized protein
GRMZM2G040121	cluster3	10.3287	7.64655	35.9935	98.0046	136.517	192.793	NA	Uncharacterized protein
GRMZM2G305362	cluster3	10.397	38.3201	36.6094	32.5589	84.5309	103.834	NA	Uncharacterized protein
GRMZM2G477063	cluster3	0.52781	3.32012	1.83941	1.84221	6.5733	13.1279	NA	Uncharacterized protein
GRMZM2G127949	cluster3	9.55499	16.6099	36.942	76.7601	149.147	192.158	atl1	Auxin transporter-like protein 1
GRMZM2G438121	cluster3	0.209734	0.899296	0.812968	0.398734	0.531318	1.36044	NA	Uncharacterized protein
GRMZM2G047835	cluster3	0.191151	0.498665	0.741511	2.08581	3.86128	4.46881	NA	Uncharacterized protein
GRMZM2G034623	cluster3	1.75701	2.70115	6.95217	7.58506	12.1632	22.2905	NA	Uncharacterized protein
GRMZM2G105092	cluster3	0.923537	9.24643	3.69929	1.84173	20.5754	9.65086	NA	Uncharacterized protein
GRMZM2G423202	cluster3	0.615496	2.91369	2.48306	5.62831	11.5649	14.5529	NA	NA
GRMZM2G316362	cluster3	45.7961	126.155	190.886	118.417	201.602	423.06	sacd9	Acyl-desaturase; Uncharacterized protein
GRMZM2G161891	cluster3	0.262121	0.469466	1.04503	1.42572	2.7874	4.70928	gst35	Glutathione S-transferase GST 35
GRMZM5G843555	cluster3	7.19254	31.6132	31.0719	12.3412	29.7771	77.5402	NA	Uncharacterized protein
GRMZM2G057841	cluster3	1.08548	26.3646	4.67286	5.79248	33.4993	42.9219	aasr6	NA
GRMZM2G322950	cluster3	0.569561	3.41082	2.54216	1.90909	4.41905	7.02976	NA	Uncharacterized protein
GRMZM2G062019	cluster3	0.0820871	0.127911	0.405816	0.353031	0.757442	2.37359	NA	Gibberellin receptor GID1L2
GRMZM6G477257	cluster3	2.24244	3.22299	10.5574	92.4503	123.72	185.08	NA	Glucose-6-phosphate isomerase; cytosolic
GRMZM2G133018	cluster3	0.128103	0.626964	0.611607	2.33936	3.59731	5.86531	NA	Uncharacterized protein
GRMZM2G053909	cluster3	0.112777	0.0812556	0.576994	2.23812	3.95604	5.59609	NA	Uncharacterized protein; Zinc finger; C3HC4 type family protein
GRMZM2G387341	cluster3	0.483863	4.15678	2.64728	3.36425	14.6153	18.2629	NA	NA
GRMZM2G165133	cluster3	0.344392	8.56187	1.90232	1.78769	3.63075	5.57012	NA	Flavoprotein wrbA; Uncharacterized protein
GRMZM2G041685	cluster3	0.14484	2.92791	0.826004	4.4938	6.29905	7.10103	gst32	NA
GRMZM2G139300	cluster3	8.62454	35.4305	48.0483	168.539	349.98	462.188	incw1	Beta-fructofuranosidase; cell wall isozyme
AC234152.1_FG005	cluster3	0.0927346	0.0841954	0.537783	0.899694	2.73028	3.61532	NA	Beta-galactosidase
GRMZM2G037284	cluster3	0.243505	0.933128	1.46425	2.24319	4.2687	10.7421	NA	Ser/Thr-rich protein T10 in DGCR region
GRMZM2G107481	cluster3	0.0537329	0.215577	0.295577	2.76602	4.88615	9.55357	NA	Uncharacterized protein
AC200725.4_FG003	cluster3	0.389714	0.503445	2.20921	3.16883	3.51658	7.41945	NA	NA
GRMZM2G007236	cluster3	0.145715	0.172417	0.843844	0.852393	1.8173	2.39156	NA	Uncharacterized protein
GRMZM2G045155	cluster3	2.52774	30.0233	15.2841	6.81839	26.7485	77.6115	NA	B12D protein
GRMZM2G113423	cluster3	0.0987334	0.397136	0.666491	1.08328	1.96467	2.22413	NA	Uncharacterized protein
GRMZM2G011006	cluster3	6.16995	26.0446	41.5571	16.3826	30.7619	65.8603	NA	Uncharacterized protein
GRMZM2G150907	cluster3	0.234251	0.556468	1.56634	6.0341	41.5255	33.5956	NA	Uncharacterized protein
GRMZM2G160840	cluster3	0.104444	1.53441	0.819029	1.07754	3.75577	5.44815	myb118	R2R3MYB-domain protein
GRMZM2G106560	cluster3	0.141823	1.33339	0.875906	0.949221	2.19717	3.66139	wrky108	NA
GRMZM2G066202	cluster3	0.0764471	0.576936	0.55769	10.235	26.3788	30.556	NA	Uncharacterized protein
GRMZM2G039996	cluster3	0.0900446	0.349489	0.686976	0.673451	2.28145	4.76219	NA	Chlorophyll a-b binding protein CP24; Uncharacterized protein
GRMZM2G349185	cluster3	0.0926749	0.197505	0.731963	3.67682	14.4256	13.0764	NA	NA
GRMZM2G056236	cluster3	0.106451	0.0320922	0.856531	3.2282	5.86237	9.35354	NA	Uncharacterized protein
GRMZM2G031724	cluster3	1.62847	5.28824	13.8631	16.4346	35.1832	48.8547	ga2ox10	Uncharacterized protein
GRMZM2G086272	cluster3	0.0328881	0.013977	0.265042	3.79988	14.2166	19.4192	NA	NA
GRMZM2G044851	cluster3	0.0742669	0.294272	0.668751	4.29825	19.3448	17.9386	NA	NA
GRMZM2G114184	cluster3	0.340168	1.98134	3.07069	3.61888	8.33469	13.0456	hagtf2	HLS1
GRMZM2G037255	cluster3	0.229386	0.221118	2.20183	2.28691	3.89534	12.8605	NA	Uncharacterized protein
GRMZM2G093010	cluster3	0.0421327	0.0892717	0.470547	3.78432	26.9455	38.2341	NA	Uncharacterized protein
GRMZM2G127945	cluster3	0.041295	0.066759	0.444442	0.551527	0.705764	1.8355	NA	NA
GRMZM2G397391	cluster3	0.0244197	0.0603486	0.269025	2.73793	10.4743	9.91759	NA	NA
GRMZM2G163054	cluster3	0.0434481	0.443315	0.476277	1.42332	3.2341	2.68903	wrky125	Putative WRKY DNA-binding domain superfamily protein; Uncharacterized protein; WRKY transcription factor
GRMZM2G075884	cluster3	0.132803	0.353172	1.36455	3.69503	7.97664	7.39252	NA	Protein kinase; Uncharacterized protein
GRMZM2G057136	cluster3	0.0275309	0.0339234	0.340984	0.204539	0.465145	1.07395	NA	NA
AC190623.3_FG001	cluster3	0.0524312	0.260348	0.684205	0.609464	0.507844	2.00846	NA	Photosystem II reaction center W protein; Uncharacterized protein
GRMZM5G824388	cluster3	0.134565	0.129863	1.80635	21.3058	74.6265	111.161	NA	Uncharacterized protein
GRMZM2G338809	cluster3	0.0218496	0.154899	0.239876	0.509147	0.769382	1.36534	NA	NA
GRMZM2G121264	cluster3	0	0	0.0718162	1.78812	1.56459	3.94414	NA	Uncharacterized protein
GRMZM2G311347	cluster3	0.500258	3.4687	7.30601	8.02101	12.6081	21.261	NA	NA
GRMZM2G001875	cluster3	0.0573731	0.141913	0.727695	3.7345	6.16807	8.35343	myb131	R2R3MYB-domain protein
GRMZM2G164454	cluster3	0.0717052	1.16738	1.0821	2.29516	2.96587	4.94734	NA	Uncharacterized protein
GRMZM2G150215	cluster3	0	0	0.10938	2.32284	7.59378	7.26999	NA	Regulatory protein
GRMZM2G403007	cluster3	0.0307772	0	0.527712	1.06911	2.27406	3.3684	pza01552	Nonspecific lipid-transfer protein; Uncharacterized protein
GRMZM2G145382	cluster3	0	0.510235	0.328062	0.466994	1.829	1.7451	NA	NA
GRMZM2G172602	cluster3	0	0.0297725	0.116331	0.314185	1.135	1.48994	NA	NA
GRMZM2G041513	cluster3	0.106853	0.381248	1.48504	4.35584	10.436	11.6373	NA	Uncharacterized protein
GRMZM2G109842	cluster3	0	0.203122	0.199937	2.46332	5.41103	6.85624	prf2	Profilin-2
GRMZM2G150276	cluster3	0.0857164	1.14769	1.57581	0.0102027	1.26695	4.72029	mir1	Insect resistance1
AC215639.3_FG002	cluster3	0	0.0304338	0.177469	0.552337	1.10454	1.22904	NA	Uncharacterized protein
GRMZM2G002396	cluster3	0.0191867	0.265031	0.466504	12.6148	27.3378	31.1113	NA	NA
GRMZM2G148485	cluster3	1.23778	9.10019	24.7923	61.2099	117.646	140.065	NA	Uncharacterized protein
GRMZM2G317596	cluster3	0.0504625	0.230424	1.2562	7.94645	17.3223	21.3989	ereb165	Putative AP2/EREBP transcription factor superfamily protein
GRMZM2G175425	cluster3	0	0.094757	0.312622	0.616152	2.02076	5.61722	NA	Putative uncharacterized protein
GRMZM2G446454	cluster3	0	0	0.266353	1.72667	5.95529	12.7366	NA	NA
GRMZM2G410766	cluster3	0.0274909	0.0322368	0.784459	2.64235	3.58138	7.09217	NA	Stress responsive protein
GRMZM2G181135	cluster3	0	0.125413	0.162803	2.80084	8.46355	18.7255	NA	Uncharacterized protein
GRMZM2G129034	cluster3	0	0.0130991	0.178814	1.28482	2.06479	2.71018	zmm27	Putative MADS-domain transcription factor; Uncharacterized protein
GRMZM2G008374	cluster3	0.0252426	0.130333	0.657706	4.42005	11.8543	9.18886	nactf24	NA
GRMZM5G866053	cluster3	0	0.0479684	0.761246	13.7739	41.2521	34.4733	NA	Uncharacterized protein
GRMZM2G477685	cluster3	0.0737521	0.276912	2.95716	3.97283	6.7035	10.7405	NA	Cortical cell-delineating protein
GRMZM2G152016	cluster3	0	0.11975	0.531477	4.35135	8.23219	11.7744	NA	Uncharacterized protein
GRMZM2G118759	cluster3	0.0385971	0.627856	2.40235	2.9434	18.7652	43.0238	NA	Glycine-rich cell wall structural protein 2
GRMZM2G122853	cluster3	0	0	0.366604	8.20926	29.2291	35.035	NA	Putative class III secretory plant peroxidase family protein; Uncharacterized protein
GRMZM2G168447	cluster3	0.0224186	0.231699	3.01552	33.0533	153.232	193.375	NA	NA
GRMZM2G025205	cluster3	0	0.555626	2.20616	8.06873	29.1502	46.552	grp4	Root cap-specific glycine-rich protein
GRMZM2G065928	cluster3	0.142343	0.325986	0	0.0296815	0.166578	0.258209	abh4	Uncharacterized protein
GRMZM2G022637	cluster3	0.850723	0.149335	0.0301585	0.19535	1.43887	0.955269	NA	ATFP4
GRMZM2G008367	cluster3	0.257844	0.235291	0	0.162515	1.40317	2.20237	NA	NA
GRMZM2G096268	cluster3	0.0975905	0	0	0.463939	1.95983	2.26573	NA	NA
GRMZM2G329029	cluster3	2.38511	2.42285	0.152645	0.0117991	8.81957	7.10847	NA	NA
GRMZM2G123104	cluster3	0.313815	0.146412	0.0204203	0.160119	1.66585	0.300293	NA	Uncharacterized protein
zma-MIR156b	cluster3	3.41731	2.39571	0.294148	3.63973	4.8222	6.25052	NA	NA
GRMZM2G158013	cluster3	2.22389	0.465468	0.198083	1.37655	3.01297	4.24525	NA	Uncharacterized protein
GRMZM2G152175	cluster3	0.390637	0.211784	0.0430005	0.260127	0.431894	0.629382	NA	Dihydroflavonol-4-reductase
GRMZM2G123143	cluster3	0.232458	0.0731244	0.0269594	0.167887	1.44707	0.530774	NA	Uncharacterized protein
GRMZM2G325513	cluster3	1.04069	0.321778	0.129758	0.478803	2.41907	4.28856	NA	Dehydration-responsive element-binding protein 1B
GRMZM2G106950	cluster3	4.16149	2.13802	0.523809	0.859142	2.32928	6.86092	NA	Uncharacterized protein
GRMZM2G435120	cluster3	1.85849	0.206257	0.238358	1.36104	8.30453	12.0413	NA	Uncharacterized protein
GRMZM2G388051	cluster3	1.9578	2.38257	0.265811	0.23039	4.9258	3.78782	NA	NA
GRMZM2G445261	cluster3	1.27134	0.750227	0.179535	1.25813	1.83342	2.07624	NA	NA
GRMZM2G154954	cluster3	0.946958	0.515276	0.134558	0.306426	1.49808	1.19395	grp3	Glycine rich protein 3
GRMZM2G357834	cluster3	0.776877	0.58984	0.113417	1.73913	1.47374	2.81113	NA	Uncharacterized protein
AC194203.3_FG003	cluster3	1.13503	0.526499	0.161701	0.315427	1.84181	1.37864	NA	NA
GRMZM2G140223	cluster3	5.03344	1.37195	0.807941	2.42178	4.24008	6.46123	NA	Uncharacterized protein
GRMZM2G135011	cluster3	1.10029	0.674454	0.178523	0.694854	1.35084	1.76267	NA	Uncharacterized protein
GRMZM5G858784	cluster3	0.303582	0.195346	0.0512914	0.218868	0.75063	1.08697	nced3	NA
GRMZM2G454514	cluster3	4.2475	2.61864	0.772817	1.13323	5.6989	4.11034	NA	Uncharacterized protein
GRMZM2G090177	cluster3	1.24276	0.311092	0.225401	3.43557	10.6933	8.43373	NA	Uncharacterized protein
GRMZM2G034563	cluster3	0.617053	0.219228	0.110556	0.613305	2.69621	2.68122	glk50	Putative uncharacterized protein
GRMZM2G169558	cluster3	11.8672	6.65969	2.17271	4.1753	13.2407	15.05	NA	Protein kinase APK1A
GRMZM2G091643	cluster3	0.562144	0.356276	0.106609	0.166349	1.09322	1.55325	NA	Uncharacterized protein
GRMZM2G167865	cluster3	0.567624	0.258256	0.107745	3.92751	17.3184	20.5483	NA	Uncharacterized protein
GRMZM2G366101	cluster3	6.11433	2.979	1.16676	1.60581	8.92938	6.94403	NA	NA
GRMZM2G073272	cluster3	4.41035	1.95799	0.875044	1.57705	7.43451	3.42078	wrky78	NA
GRMZM2G097030	cluster3	0.644317	0.300353	0.138171	0.17942	0.296285	0.837411	cngt1	UDP-glucosyltransferase
GRMZM2G336326	cluster3	0.7726	0.104618	0.164371	0.45841	1.18061	1.10278	NA	Uncharacterized protein
GRMZM2G114642	cluster3	1.86613	1.95285	0.420472	1.14976	1.69534	2.58467	gl1	Glossy1
GRMZM2G127150	cluster3	2.65378	1.9955	0.592613	0.995348	2.9298	4.07161	NA	Cationic amino acid transporter
GRMZM2G097316	cluster3	4.73981	3.10619	1.11881	55.2544	276.811	464.332	rcph1	Root cap protein 1
GRMZM2G177077	cluster3	46.2465	24.4245	10.9923	30.757	47.763	59.3166	NA	Glucose-6-phosphate 1-dehydrogenase
GRMZM2G091648	cluster3	1.46119	0.667749	0.352252	0.510012	0.589673	2.38121	NA	Putative uncharacterized protein
GRMZM2G117378	cluster3	0.353941	0.136892	0.0867103	0.377452	7.21896	7.52775	NA	NA
GRMZM2G103873	cluster3	0.642807	1.09081	0.156928	0.989733	1.74733	3.31427	NA	Uncharacterized protein
GRMZM2G123309	cluster3	0.803298	0.0296001	0.20584	0.306617	1.78257	1.38559	NA	Putative cytochrome P450 superfamily protein
GRMZM2G112198	cluster3	0.464925	0.181985	0.120691	0.289553	1.18948	0.979412	NA	Uncharacterized protein
GRMZM2G159592	cluster3	1.33333	0.441425	0.351618	0.63995	1.88091	0.874819	ereb49	Putative AP2/EREBP transcription factor superfamily protein
GRMZM2G056093	cluster3	5.26298	1.53119	1.4258	4.24286	9.3494	17.5255	NA	Uncharacterized protein
GRMZM2G458052	cluster3	3.53136	1.64878	0.964794	1.75575	12.0812	14.5543	NA	NA
GRMZM2G127031	cluster3	3.417	1.97097	0.941631	3.93541	7.55269	7.25473	NA	NA
GRMZM2G082184	cluster3	0.637557	0.12019	0.175361	0.808843	2.36664	1.59949	NA	Uncharacterized protein
GRMZM2G056786	cluster3	1.95794	1.30944	0.553382	1.67872	4.01908	4.73064	NA	Uncharacterized protein
GRMZM2G302499	cluster3	0.831529	1.50398	0.230483	0.128603	1.05304	1.71987	NA	Uncharacterized protein
GRMZM2G067702	cluster3	2.69319	0.895136	0.762308	0.861347	1.98931	3.5385	glk56	Putative MYB DNA-binding domain superfamily protein; Uncharacterized protein
GRMZM2G082199	cluster3	39.6442	36.033	12.4725	19.7122	77.5402	50.3989	NA	Elicitor-responsive protein 1
AC205471.4_FG003	cluster3	15.1179	8.08916	4.93762	5.21683	25.3544	26.8717	hsftf16	Uncharacterized protein
GRMZM2G055313	cluster3	3.92633	2.57982	1.28662	3.51838	15.2765	13.5821	NA	Uncharacterized protein
GRMZM2G074193	cluster3	2.45608	1.58733	0.809545	2.27708	1.99634	2.53133	NA	Putative uncharacterized protein
GRMZM2G022642	cluster3	8.67951	3.30946	2.88027	5.2561	8.50724	9.74177	NA	Uncharacterized protein
GRMZM2G094168	cluster3	17.5369	6.9889	5.96491	9.80116	14.1406	19.6358	platz3	Uncharacterized protein
GRMZM2G118345	cluster3	14.9101	22.8937	5.07932	15.6377	17.68	29.8512	pal6	Phenylalanine ammonia-lyase
GRMZM2G075492	cluster3	0.600532	0.201086	0.206713	1.7713	6.41744	10.868	NA	NA
GRMZM2G127328	cluster3	7.68431	6.94277	2.64315	12.6348	66.7431	52.6006	NA	LHT1
GRMZM2G109130	cluster3	240.035	125.269	82.9478	267.103	282.55	563.779	lox3	Lipoxygenase
AC216871.3_FG004	cluster3	1.14555	0.689569	0.404312	1.29954	1.14078	1.58106	NA	Uncharacterized protein
GRMZM2G119465	cluster3	1.0513	0.494345	0.377965	2.96974	4.92494	6.15579	NA	Uncharacterized protein
GRMZM2G056804	cluster3	8.3344	4.30145	2.98776	4.08848	9.56577	14.2005	NA	NA
GRMZM2G102662	cluster3	0.89548	1.02425	0.313111	2.30206	5.76867	7.12063	NA	Putative cytochrome P450 superfamily protein
AC234528.1_FG006	cluster3	1.3994	1.01919	0.513653	0.876507	1.83773	2.28547	NA	NA
GRMZM2G022212	cluster3	1.70228	2.67239	0.622852	1.60389	2.21706	1.84149	NA	NA
GRMZM2G157168	cluster3	5.09357	7.25128	1.89911	5.33323	4.77725	5.79928	NA	Uncharacterized protein
GRMZM2G099363	cluster3	43.8422	27.1025	16.5484	45.5542	75.1879	67.6413	omt2	Caffeoyl-CoA O-methyltransferase 2
GRMZM2G100583	cluster3	30.6588	20.8024	11.5719	18.6567	25.762	35.6804	nactf75	NAC domain-containing protein 68; Putative NAC domain transcription factor superfamily protein; Uncharacterized protein
GRMZM2G089244	cluster3	1.22765	0.595143	0.461453	0.738565	0.784121	1.56052	myb67	Putative MYB DNA-binding domain superfamily protein
AC233899.1_FG004	cluster3	4.45212	1.95801	1.68215	6.68426	16.9943	27.9335	hb12	Putative homeobox DNA-binding and leucine zipper domain family protein
GRMZM2G173413	cluster3	5.94921	3.81434	2.29433	4.25171	9.92877	8.52012	NA	Uncharacterized protein
GRMZM2G154090	cluster3	16.1177	20.7412	6.21071	13.8556	45.7797	31.5388	pht2	Inorganic phosphate transporter 1; Uncharacterized protein
GRMZM2G359260	cluster3	0.934653	1.09936	0.364613	1.63659	2.67831	2.66252	NA	Putative CRINKLY4-like receptor protein kinase family protein
GRMZM2G380088	cluster3	7.14611	4.02034	2.82954	7.27721	12.0853	17.6847	NA	Cytidine deaminase
GRMZM2G420910	cluster3	2.18869	0.481384	0.886731	3.83457	9.99943	6.72087	NA	NA
GRMZM5G826174	cluster3	8.33341	10.2397	3.36004	4.37705	10.604	7.8058	cle21	NA
GRMZM2G440866	cluster3	57.7179	46.7339	23.6744	31.2209	66.7065	52.0731	NA	RING-H2 finger protein ATL2B; Uncharacterized protein
GRMZM2G080731	cluster3	1.66234	1.00446	0.683231	1.27547	1.46055	1.65587	bzip25	Putative bZIP transcription factor superfamily protein isoform 1; Putative bZIP transcription factor superfamily protein isoform 2; Uncharacterized protein
GRMZM2G033480	cluster3	4.22155	2.61659	1.74904	3.78566	7.17766	9.2398	NA	Uncharacterized protein
GRMZM2G170602	cluster3	19.0075	20.0478	7.85919	13.1315	29.469	73.1055	NA	NA
GRMZM2G009506	cluster3	9.20347	5.19658	3.89184	5.93522	10.9691	10.6501	sln1	Serine/threonine-protein kinase receptor
GRMZM2G300801	cluster3	197.075	158.173	84.2819	163.821	165.368	236.449	NA	Uncharacterized protein
GRMZM2G084264	cluster3	3.86453	2.64704	1.66064	3.18428	3.67917	4.5824	ereb27	Putative AP2/EREBP transcription factor superfamily protein
GRMZM2G155323	cluster3	17.8357	9.68858	7.71844	16.6627	17.1227	19.6621	NA	NA
GRMZM2G156388	cluster3	2.31621	1.26483	1.0276	1.75013	2.86852	2.67264	NA	RAB; member of RAS oncogene family-like 3; Uncharacterized protein
GRMZM2G159477	cluster3	31.366	20.9901	13.6597	15.2652	54.7204	63.3965	NA	Uncharacterized protein
GRMZM2G006894	cluster3	85.4894	74.3828	37.407	76.4825	134.951	155.576	mha4	Plasma membrane H+-transporting ATPase-like protein
GRMZM5G829544	cluster3	24.0426	13.0549	10.5449	19.3937	31.2839	22.1563	fat2	Putative acyl-ACP thioesterase family protein
GRMZM2G021436	cluster3	5.2772	2.75555	2.36128	9.08198	12.1936	13.3286	NA	Putative cytochrome P450 superfamily protein
GRMZM2G029270	cluster3	4.36237	4.32533	1.94913	3.42068	5.64636	4.43069	NA	NA
GRMZM2G010333	cluster3	10.8035	10.9338	4.88592	5.00009	17.9116	23.8046	NA	Uncharacterized protein
GRMZM2G007195	cluster3	88.2179	65.7076	40.3637	32.5318	81.0018	101.706	NA	Uncharacterized protein
GRMZM2G042171	cluster3	3.60188	1.45008	1.65453	3.46303	4.74392	7.18346	NA	Uncharacterized protein
GRMZM2G081886	cluster3	76.1637	87.4275	34.9908	57.4124	70.4581	92.9887	NA	NA
GRMZM2G368799	cluster3	7.39404	5.62977	3.42331	6.87518	6.98818	7.59187	NA	Inositol hexaphosphate kinase
GRMZM2G155329	cluster3	22.7838	31.2843	10.5144	16.1927	22.2913	27.2951	chi1	Chalcone--flavonone isomerase
GRMZM2G125507	cluster3	12.5147	7.28979	5.77773	5.20249	18.1153	14.9295	NA	Septum-promoting GTP-binding protein 1
GRMZM2G325683	cluster3	16.8896	22.9411	7.78848	14.4029	19.4007	16.9485	NA	Putative uncharacterized protein
GRMZM2G105221	cluster3	14.6721	20.3366	6.80059	5.3975	18.9556	18.199	NA	Glycosyltransferase; Uncharacterized protein
GRMZM5G895188	cluster3	15.3771	7.28615	7.16904	10.9717	21.3329	28.0889	NA	Uncharacterized protein
GRMZM2G437912	cluster3	69.1084	76.8175	32.4081	47.8565	105.285	80.3108	adt6	Uncharacterized protein
GRMZM2G150450	cluster3	1.67893	1.55173	0.786943	2.63382	5.83739	5.82311	NA	Metal ion binding protein
GRMZM2G102862	cluster3	0.936238	0.583589	0.444554	0.384108	0.896494	1.5863	NA	NA
GRMZM2G324471	cluster3	34.257	18.3038	16.4488	27.5181	33.3471	30.3849	NA	Uncharacterized protein
GRMZM2G075901	cluster3	26.5313	18.0941	12.7303	17.0168	25.2077	27.582	NA	Putative uncharacterized protein
GRMZM2G111903	cluster3	26.8051	20.3977	12.9077	17.3859	26.8157	27.1254	mrpa3	Multidrug resistance-associated protein3
GRMZM2G104231	cluster3	6.24302	4.93058	3.03621	7.15277	11.1479	10.3406	NA	Uncharacterized protein
GRMZM2G121851	cluster3	9.93074	4.19593	4.81251	7.91911	12.5139	11.8047	NA	Calmodulin binding protein
GRMZM2G060942	cluster3	1.09312	0.450706	0.527165	1.03862	1.09291	1.56245	NA	NA
GRMZM2G093826	cluster3	23.9525	25.265	11.7799	24.7899	47.9899	41.3751	NA	Potassium high-affinity transporter
GRMZM2G164974	cluster3	9.36929	7.20872	4.60222	11.3438	15.2027	16.7814	NA	3-ketoacyl-CoA synthase
GRMZM2G328356	cluster3	3.94453	2.11987	1.93218	2.87322	4.11525	4.11775	NA	NA
GRMZM2G115921	cluster3	12.5767	7.08517	6.19226	11.2736	12.3354	14.7073	NA	TRAF type zinc finger domain containing 1
GRMZM2G459110	cluster3	6.97539	5.70326	3.43464	5.54166	12.1443	11.0145	NA	NA
GRMZM2G076450	cluster3	11.1346	5.64209	5.50671	12.3617	18.718	16.798	NA	Regulatory protein NPR1
GRMZM2G074689	cluster3	18.4293	10.9428	9.16818	11.2511	17.9413	19.3024	NA	Uncharacterized protein
GRMZM5G828396	cluster3	2.51249	1.25259	1.24208	5.06194	7.85149	9.28444	bhlh81	Uncharacterized protein
GRMZM2G022793	cluster3	4.43326	7.56655	7.1201	8.85218	11.9745	13.6026	NA	Uncharacterized protein
GRMZM2G048129	cluster3	94.4958	141.733	167.258	190.017	269.393	435.261	NA	MtN19-like protein
GRMZM2G033175	cluster3	1.88951	3.16043	1.48622	3.81472	21.3459	21.5201	NA	Uncharacterized protein
GRMZM2G000741	cluster3	9.80992	14.2706	14.5386	19.9372	25.4029	43.6662	NA	Uncharacterized protein
GRMZM2G119696	cluster3	1.6472	1.06442	1.24435	3.35361	3.60151	5.02975	NA	Uncharacterized protein
GRMZM2G364208	cluster3	16.6631	58.8968	20.9985	34.1667	114.451	128.852	NA	Uncharacterized protein
GRMZM2G404081	cluster3	3.64361	3.75909	11.1169	7.44383	15.8564	17.7718	NA	Putative DUF231 domain containing family protein
GRMZM2G104394	cluster3	6.15778	17.2622	23.5359	12.5432	26.2634	36.902	pox1	Peroxidase 1
GRMZM2G018760	cluster3	2.74036	3.1016	2.44386	5.59059	7.10367	12.001	NA	MazG nucleotide pyrophosphohydrolase domain protein
GRMZM2G136389	cluster3	5.12274	3.96344	5.35515	10.7414	14.5692	17.237	hagtf37	Uncharacterized protein
GRMZM2G181236	cluster3	18.7634	13.1696	11.6251	38.9425	94.3655	150.697	NA	Uncharacterized protein
GRMZM2G005859	cluster3	10.7795	12.1107	10.9304	22.404	50.5909	80.4364	NA	Uncharacterized protein
GRMZM2G111657	cluster3	2.00667	2.54739	3.00103	4.16868	7.79749	8.9569	NA	Protein binding protein
AC198937.4_FG003	cluster3	1.74823	7.20917	2.70585	3.56998	11.0072	17.9017	NA	Uncharacterized protein
GRMZM2G126582	cluster3	12.4655	5.63169	8.8747	26.0818	68.241	55.3998	NA	Aquaporin NIP-type
GRMZM2G062600	cluster3	2.22722	9.04474	3.28134	4.61956	19.7808	18.3479	NA	Putative O-Glycosyl hydrolase superfamily protein
GRMZM2G080045	cluster3	2.98166	6.98899	1.87167	6.21751	8.1965	11.2689	NA	Ammonium transporter 2; Uncharacterized protein
GRMZM2G009166	cluster3	3.91219	4.30336	4.2745	8.23039	17.725	25.886	NA	NA
GRMZM2G007055	cluster3	3.11305	1.93385	2.2991	6.52488	8.54014	10.019	NA	Uncharacterized protein
GRMZM2G375947	cluster3	1.29215	1.40561	1.33239	2.75382	3.50502	4.66332	NA	NA
GRMZM2G102550	cluster3	3.07151	10.7912	3.76784	6.47272	19.7305	21.1683	ggps2	Putative geranylgeranyl pyrophosphate synthase 2
GRMZM2G028254	cluster3	1.06663	1.84787	1.89523	2.18252	4.14528	5.23777	NA	Uncharacterized protein
GRMZM5G865508	cluster3	6.86493	9.58026	10.0947	14.7543	15.5955	38.3149	NA	MYND finger family protein
AC199765.4_FG008	cluster3	23.8881	26.1994	19.8125	51.2312	75.1337	110.545	NA	Uncharacterized protein
GRMZM2G057959	cluster3	7.53224	12.9155	6.18911	16.193	18.7523	22.4119	NA	Cyclase/dehydrase family protein
GRMZM2G173682	cluster3	3.90482	4.42321	5.58284	8.45919	11.0829	13.2357	atg4b	Autophagy 4b variant 3; Uncharacterized protein
GRMZM2G096403	cluster3	1.40312	0.69917	1.69615	3.08094	4.61297	5.45765	NA	Uncharacterized protein
GRMZM5G818643	cluster3	0.828013	0.589066	0.997279	1.76543	2.98246	3.95668	bhlh86	Uncharacterized protein
GRMZM2G381025	cluster3	1.03431	0.892651	1.16104	2.17331	3.36632	3.61196	NA	NA
GRMZM2G106511	cluster3	2.27718	11.8009	8.45613	5.01166	8.85316	21.1178	NA	Uncharacterized protein; Wound-induced protein
GRMZM2G138907	cluster3	29.9791	30.1369	16.3833	65.0476	121.528	149.494	NA	GDP-mannose 3;5-epimerase 2 isoform 1; GDP-mannose 3;5-epimerase 2 isoform 2
GRMZM2G093270	cluster3	6.75557	6.64072	4.89112	14.6591	16.9441	27.506	platz13	Uncharacterized protein
GRMZM2G172230	cluster3	8.59618	4.48864	6.52526	18.7994	32.9655	45.1246	NA	Uncharacterized protein
GRMZM2G017186	cluster3	4.46229	3.52477	5.27114	9.8761	15.7699	22.94	NA	Exhydrolase II
GRMZM2G475948	cluster3	3.53883	6.33611	11.4659	7.8493	11.4921	24.0712	NA	Lectin-like receptor kinase 7
GRMZM2G453805	cluster3	15.0218	45.1782	8.75895	33.42	32.2517	51.0986	chn1	Uncharacterized protein
GRMZM2G119300	cluster3	8.88096	12.8411	12.0797	19.9483	33.9618	45.5945	NA	Uncharacterized protein
GRMZM2G470882	cluster3	7.37975	45.5569	27.4121	16.6316	30.4612	43.6754	NA	Uncharacterized protein
GRMZM5G826838	cluster3	10.2854	11.5721	8.1767	23.2972	32.6145	53.6308	NA	Glutamate decarboxylase; Uncharacterized protein
GRMZM2G032602	cluster3	1.19925	2.32616	1.44024	2.73868	6.0397	3.68307	NA	Disease resistance gene analog PIC17
GRMZM2G147245	cluster3	13.2955	19.8751	7.68884	30.3528	42.1126	58.6218	NA	Putative cytochrome P450 superfamily protein; Uncharacterized protein
GRMZM2G429714	cluster3	2.93681	3.2401	1.63329	6.71848	27.8323	26.1476	NA	Putative leucine-rich repeat receptor-like protein kinase family protein
GRMZM2G169654	cluster3	13.0913	14.7206	11.4168	30.2651	48.3247	57.1	ereb126	DNA-binding protein RAV1
AC233955.1_FG008	cluster3	9.98897	47.617	10.7676	23.0627	31.7854	29.6691	NA	Uncharacterized protein
GRMZM2G127117	cluster3	13.1873	13.4691	22.0449	30.9981	58.6844	83.014	NA	Glucan endo-1;3-beta-glucosidase 7; Uncharacterized protein
GRMZM5G836406	cluster3	1.08193	0.384619	0.75285	2.53899	4.81084	4.79025	NA	Uncharacterized protein
GRMZM2G129860	cluster3	12.3831	15.5268	20.0176	29.5121	34.5472	71.9729	cyp11	Cytochrome P450 monooxygenase CYP72A5; Uncharacterized protein
GRMZM2G029219	cluster3	2.65481	3.55953	3.08935	6.31335	11.5612	11.9977	NA	Carbohydrate transporter/ sugar porter/ transporter
GRMZM2G315401	cluster3	3.84374	18.9117	10.758	9.03286	17.3219	22.0843	NA	Uncharacterized protein
GRMZM2G050172	cluster3	4.97643	0.93608	1.73896	11.8446	13.1827	21.6425	NA	NA
GRMZM2G339563	cluster3	3.79386	3.71107	5.9345	9.07952	7.65278	17.2669	lls1	Lethal leaf-spot 1
GRMZM2G110309	cluster3	7.8478	5.64733	7.40424	18.9404	31.7988	31.0893	ibp2	Initiator-binding protein 2; Uncharacterized protein
GRMZM2G029048	cluster3	64.642	80.1926	54.5517	155.745	159.263	214.214	pal9	Putative uncharacterized protein
GRMZM2G180328	cluster3	1.73198	3.4123	1.91329	4.19639	12.2457	23.5511	nactf20	Putative NAC domain transcription factor superfamily protein; Uncharacterized protein
GRMZM2G371606	cluster3	3.95425	9.27452	5.42528	9.58088	9.43661	18.915	NA	Uncharacterized protein
GRMZM2G047961	cluster3	1.2992	0.678786	0.929665	3.11217	4.34912	5.67779	NA	NA
GRMZM2G024686	cluster3	8.5224	4.70936	9.51297	20.7242	23.5009	38.7768	NA	Aspartokinase
GRMZM2G168976	cluster3	1.51222	6.02247	1.78539	3.57648	8.27271	10.0205	NA	Carbonyl reductase 3; Uncharacterized protein
GRMZM2G415022	cluster3	0.964573	0.867728	1.29323	2.36302	8.40841	9.70787	NA	Uncharacterized protein
GRMZM2G413030	cluster3	1.80729	2.74878	2.45071	4.4332	14.5024	11.429	NA	NA
GRMZM2G010488	cluster3	0.308808	0.12432	0.136054	0.755942	3.5299	2.0804	NA	Putative U-box domain protein kinase family
GRMZM2G044724	cluster3	8.70541	5.26886	8.16231	21.9928	28.1552	34.3338	NA	Uncharacterized protein
GRMZM2G446858	cluster3	0.402397	0.409043	0.639493	1.01669	3.3159	3.43555	ccd8	Carotenoid cleavage dioxygenase
GRMZM2G432583	cluster3	7.23662	6.63947	7.72296	18.4784	83.6036	92.7375	wrky44	Putative WRKY DNA-binding domain superfamily protein
GRMZM2G167253	cluster3	0.486938	0.314454	0.757063	1.26642	2.61788	4.30648	NA	NA
GRMZM2G048210	cluster3	2.36934	2.67617	3.82037	6.17072	8.97305	12.0599	NA	Uncharacterized protein
GRMZM2G118959	cluster3	5.38603	1.9304	6.54011	14.2261	28.6113	31.1219	NA	Uncharacterized protein
GRMZM2G417089	cluster3	13.8431	21.9629	26.5321	36.6538	52.1723	81.9911	jmj22	NA
GRMZM2G344848	cluster3	1.32211	1.99757	2.85001	3.50029	2.91048	7.68053	NA	Putative uncharacterized protein
GRMZM2G335280	cluster3	0.482002	1.21536	0.480151	1.26252	2.745	3.30676	NA	NA
GRMZM2G095039	cluster3	20.379	28.9181	38.7176	54.8799	89.7243	92.0808	NA	Rapid alkalinization factor 1; Uncharacterized protein
GRMZM2G377168	cluster3	0.401251	0.749611	0.753064	1.06679	1.03413	1.85559	NA	Uncharacterized protein
GRMZM2G024350	cluster3	1.04291	2.7917	1.40222	2.84233	2.44607	4.16888	NA	Uncharacterized protein
GRMZM2G532387	cluster3	1.21905	1.72445	2.53402	3.3251	5.9367	8.66216	NA	NA
GRMZM2G171254	cluster3	0.718495	2.14263	1.89496	1.96609	3.27307	4.31496	NA	Uncharacterized protein
GRMZM2G132251	cluster3	11.9417	20.1744	21.5057	33.2372	35.0365	55.4899	NA	Uncharacterized protein
GRMZM2G031991	cluster3	2.26337	6.44338	3.86344	6.249	8.25256	10.757	NA	Uncharacterized protein
GRMZM2G434388	cluster3	1.40935	0.407833	0.992693	3.96263	10.8862	9.5425	NA	NA
GRMZM2G419542	cluster3	0.485324	2.02459	1.92007	1.33703	2.31668	3.26985	NA	Uncharacterized protein
GRMZM2G110388	cluster3	3.09351	1.54629	1.22793	8.75455	16.8053	14.9848	NA	Putative cytochrome P450 superfamily protein
GRMZM2G388608	cluster3	0.476095	0.481055	0.988809	1.33432	3.97231	4.17713	NA	Uncharacterized protein
GRMZM2G401511	cluster3	2.93106	4.34929	7.43266	8.54025	26.7613	31.4501	NA	Plant-specific domain TIGR01627 family protein
GRMZM2G412986	cluster3	0.461184	2.69639	1.07183	1.2922	5.50512	6.87948	NA	Uncharacterized protein
GRMZM5G892675	cluster3	1.20524	1.08163	0.658141	3.49786	8.33505	17.7895	NA	Uncharacterized protein
GRMZM2G080524	cluster3	1.46194	4.11822	2.91805	4.3087	6.66978	8.34175	NA	Catalytic/ hydrolase
GRMZM2G433767	cluster3	1.22253	0.96669	1.17064	3.56691	8.72648	8.77735	NA	Uncharacterized protein
GRMZM2G173067	cluster3	4.88029	5.91419	6.79885	14.5097	17.4241	25.3518	NA	Uncharacterized protein
GRMZM2G063151	cluster3	4.32546	2.8091	5.66207	12.8979	26.3454	28.9412	ibp1	Initiator binding protein
GRMZM2G040298	cluster3	0.715096	1.63357	1.01541	2.1196	3.27002	4.87582	wrky29	Uncharacterized protein
GRMZM2G005052	cluster3	1.44794	0.656525	1.0886	4.34452	7.41681	8.9693	NA	Uncharacterized protein
GRMZM2G336929	cluster3	0.829788	0.433997	0.670516	2.52731	10.829	14.7581	NA	NA
GRMZM2G136347	cluster3	0.587287	3.97706	4.11122	1.75845	7.03133	12.1133	NA	Cupin; RmlC-type
GRMZM2G115981	cluster3	4.38931	1.16694	2.34776	13.3312	16.6738	33.9062	AY110296	NA
GRMZM2G162290	cluster3	3.67797	2.03153	3.76395	11.2027	13.5401	20.3021	NA	NA
GRMZM2G148495	cluster3	0.413197	1.00543	0.862605	1.29009	1.95266	6.22745	NA	Uncharacterized protein
GRMZM2G144224	cluster3	20.1069	34.0928	26.152	62.1731	70.8506	116.876	NA	NA
GRMZM2G061469	cluster3	2.25238	0.738281	2.80109	6.99405	10.0583	11.443	NA	C4-dicarboxylate transporter/malic acid transport protein isoform 1; C4-dicarboxylate transporter/malic acid transport protein isoform 2
GRMZM2G142342	cluster3	1.03421	1.76894	1.86254	3.18593	7.64631	6.72549	NA	Uncharacterized protein
GRMZM2G001991	cluster3	3.21967	4.03821	3.62202	10.1188	10.1839	32.4664	NA	Dihydroflavonol-4-reductase; Uncharacterized protein
GRMZM2G126817	cluster3	0.245523	0.23174	0.128889	0.766545	3.81477	3.24445	nactf39	Putative NAC domain transcription factor superfamily protein
GRMZM2G067546	cluster3	15.1094	24.087	28.9233	47.8074	70.2065	86.4982	vacs1	Uncharacterized protein; Vacuolar sorting receptor 1; Vacuolar sorting receptor-like protein
GRMZM2G334660	cluster3	0.704301	5.77745	1.32027	2.25714	6.71026	4.96512	pal8	NA
GRMZM2G136525	cluster3	0.897154	1.20107	2.59759	2.90894	6.74502	9.30961	NA	Peroxidase 12; Uncharacterized protein
GRMZM2G129674	cluster3	39.2753	46.3957	60.3783	128.263	136.269	287.414	ereb179	Uncharacterized protein
GRMZM2G007477	cluster3	2.15066	9.93295	4.32148	7.07046	11.0833	13.0446	NA	Uncharacterized protein
GRMZM2G044773	cluster3	0.736829	3.96498	1.27887	2.41833	10.1856	5.26651	NA	Putative RING zinc finger domain superfamily protein
GRMZM2G135387	cluster3	3.39153	6.09798	4.71326	11.2972	18.4157	24.9119	NA	Uncharacterized protein
GRMZM2G151934	cluster3	0.466027	0.251036	0.715022	1.56901	3.37161	4.09931	limtf13	Uncharacterized protein
GRMZM2G081105	cluster3	0.638176	0.543251	1.17044	2.16293	9.43145	11.4567	NA	Uncharacterized protein
GRMZM2G156255	cluster3	1.70334	1.28358	2.90842	5.85329	10.5869	13.364	ork1	Uncharacterized protein
GRMZM2G407825	cluster3	2.08261	3.74421	3.70621	7.22459	17.7743	23.646	NA	NA
GRMZM2G330049	cluster3	1.42048	1.40648	1.88531	5.00666	5.90865	10.0793	NA	CIPK-like protein 1
GRMZM2G046587	cluster3	2.12877	1.55098	3.56637	7.67909	16.1461	17.0745	NA	Uncharacterized protein
GRMZM2G125448	cluster3	0.397412	2.97122	0.494967	1.36822	2.56561	2.38985	NA	NA
GRMZM2G165987	cluster3	2.43168	7.24893	3.23143	8.82494	14.5102	12.2359	NA	Pirin-like protein; Uncharacterized protein
GRMZM5G836610	cluster3	0.191136	0.167726	0.298751	0.676876	0.969387	1.44522	NA	Putative cytochrome P450 superfamily protein
AC225718.2_FG009	cluster3	19.6394	37.3224	36.4692	72.3313	179.398	190.102	NA	Putative uncharacterized protein
GRMZM2G102483	cluster3	6.41132	1.84816	9.055	23.483	19.0643	58.612	NA	Putative uncharacterized protein
GRMZM2G080247	cluster3	1.75311	2.28686	3.35839	6.46862	17.4889	14.5282	NA	Uncharacterized protein
GRMZM2G437481	cluster3	0.227478	0.331499	0.39372	0.849967	1.95357	6.14593	bhlh133	Putative HLH DNA-binding domain superfamily protein
GRMZM2G004511	cluster3	3.77409	5.03366	3.26266	14.6943	17.7017	25.9654	NA	Remorin
GRMZM2G131177	cluster3	0.221665	0.422654	0.335779	0.841821	2.20532	2.95561	NA	NA
GRMZM2G083350	cluster3	5.89553	24.5567	8.66318	23.6774	73.9324	54.6652	wrky26	Putative WRKY DNA-binding domain superfamily protein
GRMZM2G074505	cluster3	0.210431	0.294544	0.125755	0.896807	0.903384	2.2355	NA	NA
GRMZM2G009045	cluster3	4.07138	18.9961	6.45571	16.7297	44.6935	60.2995	NA	NA
GRMZM2G143745	cluster3	0.264401	0.279915	0.0332115	1.08988	4.00523	5.63427	NA	Uncharacterized protein
GRMZM2G061305	cluster3	15.7658	12.5599	28.3297	65.3233	143.495	192.599	NA	Transposon protein
GRMZM2G154414	cluster3	0.22996	0.522037	0.381552	0.997893	1.30881	1.85838	cki8	Uncharacterized protein
GRMZM2G071292	cluster3	0.35043	0.674336	0.598813	1.50345	3.53409	8.6123	NA	NA
GRMZM2G098346	cluster3	25.8327	54.0741	45.3317	109.394	256.527	346.148	adh2	Alcohol dehydrogenase 2
GRMZM2G337048	cluster3	0.480806	0.513365	0.842036	2.00449	3.88306	3.35073	NA	NA
GRMZM2G409976	cluster3	0.193974	0.0669771	0.21121	0.845621	1.57836	1.56052	NA	NA
AC193598.3_FG002	cluster3	0.0832446	0.0300123	0.0972771	0.372598	1.56473	1.45684	NA	Uncharacterized protein
GRMZM2G164098	cluster3	0.449479	0.714232	0.604908	1.89173	5.82587	3.82177	NA	Uncharacterized protein
GRMZM2G364839	cluster3	0.723152	0.824184	1.61764	3.08045	4.21802	7.77493	NA	Uncharacterized protein
GRMZM2G104032	cluster3	1.17948	2.29719	1.6175	5.27639	24.9379	29.0825	NA	NA
GRMZM2G322220	cluster3	0.445894	0.195315	0.616151	2.09992	4.84568	4.55937	NA	Uncharacterized protein
GRMZM2G022311	cluster3	3.6173	10.5979	6.86592	17.4704	39.4368	58.2729	NA	NA
GRMZM2G075253	cluster3	1.13551	1.69773	1.53446	5.75821	17.9698	24.6047	NA	NA
GRMZM2G159908	cluster3	3.21201	2.67629	4.41604	16.4677	41.8756	39.6848	NA	Uncharacterized protein
GRMZM2G364369	cluster3	0.346505	0.568831	0.634213	1.87506	5.03443	4.25401	NA	Uncharacterized protein
GRMZM2G046848	cluster3	0.10326	0.513732	0.357117	0.555322	2.67045	2.57236	NA	NA
GRMZM2G126865	cluster3	5.1597	9.65673	9.78312	28.8646	45.1832	48.7797	NA	Uncharacterized protein
GRMZM2G061798	cluster3	0.36197	0.322097	0.339359	2.16717	3.73161	5.06855	NA	Putative uncharacterized protein
GRMZM2G361100	cluster3	0.415077	1.67226	1.87197	2.52104	4.00736	4.84794	NA	NA
GRMZM2G178704	cluster3	0.264817	0.636394	0.328003	1.585	3.89868	3.58557	NA	Disease resistance protein RGA4
GRMZM2G046743	cluster3	11.6571	9.73552	6.91525	74.3653	135.518	165.587	NA	Uncharacterized protein
GRMZM2G003246	cluster3	0.264484	0.332065	0.547047	1.69296	2.30555	3.28532	NA	Uncharacterized protein
GRMZM2G458659	cluster3	1.01587	5.9773	2.42078	6.78796	5.99	12.9698	NA	Uncharacterized protein
GRMZM2G039212	cluster3	0.155375	1.89008	1.00218	0.889492	1.54246	5.26041	NA	Uncharacterized protein
GRMZM2G307262	cluster3	1.09489	1.78091	1.66177	7.41595	24.0837	24.544	NA	Uncharacterized protein
GRMZM2G318652	cluster3	0.616141	4.2343	1.34734	4.19202	10.4085	12.0545	NA	NA
GRMZM2G173826	cluster3	0.171874	0.111865	0.184953	1.23536	4.96027	6.54276	NA	NA
GRMZM2G018716	cluster3	0.216722	0.983477	0.175135	1.51048	5.7339	9.6518	NA	Uncharacterized protein
GRMZM2G035444	cluster3	0.171149	0.020141	0.155905	1.30532	2.32898	2.91744	NA	CASP-like protein 2
GRMZM2G020523	cluster3	0.200741	0.157664	0.144538	1.50063	5.3492	8.92323	NA	Peroxidase 2
GRMZM2G516301	cluster3	0.449423	2.87448	1.93401	3.41638	16.781	10.1341	wrky80	Putative WRKY DNA-binding domain superfamily protein; Uncharacterized protein
GRMZM2G059029	cluster3	0.173862	0.179362	0.315187	1.35419	1.96943	3.50068	NA	Uncharacterized protein
GRMZM2G110018	cluster3	0.319071	0.0563689	0.14365	2.60804	4.95181	6.82401	NA	Uncharacterized protein
GRMZM2G069503	cluster3	0.128447	0.283595	0.0964601	1.09843	2.20903	7.67857	NA	Uncharacterized protein
GRMZM2G438243	cluster3	0.0860326	0.706273	0.378128	0.632667	0.644442	1.3398	NA	Uncharacterized protein
GRMZM2G059785	cluster3	0.966932	0.0450749	0.148281	8.7696	68.025	84.1424	NA	Uncharacterized protein
GRMZM2G434155	cluster3	0.0763674	0.045626	0.953011	0.756491	1.56606	2.1041	NA	NA
GRMZM2G127184	cluster3	0.564916	0.234691	0.445528	5.47801	18.6789	21.286	NA	NA
GRMZM2G072890	cluster3	0.947919	0.730963	0.7505	9.23726	15.6663	44.9039	NA	Late embryogenesis abundant protein
GRMZM2G014610	cluster3	0.518222	0.232869	0.234579	5.0131	18.0571	22.2622	NA	Uncharacterized protein
GRMZM2G410134	cluster3	0.354415	1.49843	0.626531	3.30564	11.9777	17.7439	glb3	Alpha globulin; Globulin; Globulin 1; Uncharacterized protein
GRMZM2G036629	cluster3	0.389054	0.381637	0.643281	4.06585	14.498	21.8334	NA	Metallothionein-like protein 1
GRMZM2G050384	cluster3	0.479788	19.3998	9.44736	5.07443	21.0175	41.4726	NA	Uncharacterized protein
GRMZM2G136486	cluster3	6.67594	8.65866	10.7084	73.7142	147.234	144.042	NA	Elicitor-responsive protein 3
GRMZM5G899851	cluster3	5.49592	3.26288	5.21649	62.6456	112.54	126.054	ao2	NA
GRMZM2G043300	cluster3	0.235177	2.27994	2.51034	2.6977	4.19282	9.03206	NA	Chemocyanin
GRMZM2G070913	cluster3	0.0483549	0	0	0.598981	4.76307	8.38557	NA	Uncharacterized protein
GRMZM2G456997	cluster3	0.0422614	0	0	0.657013	3.54894	4.22749	NA	NA
GRMZM2G413774	cluster3	0.0171257	0	0.00400747	0.25452	1.41053	2.59643	NA	Uncharacterized protein
GRMZM2G434792	cluster3	0.0913201	0.00950953	0.0396242	1.3679	3.07821	3.13962	NA	NA
GRMZM2G438960	cluster3	0.00708896	0.106846	0.00734841	0.126472	3.4011	4.93123	NA	NA
GRMZM2G002142	cluster3	0.0563413	0.0311598	0.110112	0.898333	1.07539	2.05281	abh5	NA
GRMZM5G801307	cluster3	0	0.0313323	0.034044	0.332563	0.567522	1.03525	NA	Putative uncharacterized protein
GRMZM2G042218	cluster3	0.0482998	0.0785075	0.0786345	0.954304	3.87932	4.32444	dof38	Uncharacterized protein
AC233933.1_FG001	cluster3	0.0209862	0.387342	0.0915599	0.464731	1.31059	0.960288	ereb128	NA
GRMZM2G388823	cluster3	0.186841	0.949075	0.655059	3.82177	5.95522	7.48628	NA	Putative uncharacterized protein
GRMZM2G326788	cluster3	0.113538	0	0.0186382	2.11468	2.74709	3.7944	NA	NA
GRMZM2G355499	cluster3	0	0.19217	0.114464	0.307698	1.0887	2.35361	NA	NA
GRMZM2G701367	cluster3	0.0525656	0	0.162856	1.22361	2.53201	3.33626	NA	NA
GRMZM2G104523	cluster3	0	0.0371372	0.12911	0.345125	2.16341	1.61738	NA	NA
GRMZM2G427937	cluster3	0.116763	0.158528	0.292419	2.22632	7.599	6.14642	NA	Peroxidase
GRMZM5G823157	cluster3	0.419972	0.167162	0.347402	7.79338	21.0216	29.2447	wrky46	NA
GRMZM2G446204	cluster3	0.0136448	0.122537	0.0813429	0.236553	0.940836	1.25426	NA	Uncharacterized protein
GRMZM2G136139	cluster3	0.0141273	0	0.00678567	0.306368	3.36738	3.93283	NA	Neutral/alkaline invertase
GRMZM2G033665	cluster3	0.0233908	0.236245	0.131158	0.53169	1.40633	1.236	NA	Uncharacterized protein
GRMZM2G107591	cluster3	0	0.0180355	0.031967	0.201284	0.619439	1.47627	NA	Uncharacterized protein
AC208110.2_FG001	cluster3	0.12495	0.0826031	0.656302	2.65058	4.99	4.8987	wrky112	Putative WRKY DNA-binding domain superfamily protein
GRMZM2G311500	cluster3	0.0822189	0.478392	0.819569	1.97551	2.42902	3.97615	NA	Uncharacterized protein
GRMZM6G397851	cluster3	0	0.0284233	0.0236186	0.367233	1.05277	1.36315	NA	Uncharacterized protein
GRMZM2G164225	cluster3	0	0	0	0.849192	2.07276	2.19457	NA	Uncharacterized protein
GRMZM2G448051	cluster3	0.0516356	0.0451159	0.192005	1.38823	4.34889	7.19818	NA	Uncharacterized protein
GRMZM2G479980	cluster3	0	0	0	0.261871	1.31334	1.18823	nactf73	NA
GRMZM5G818106	cluster3	0	0	0.0608442	0.23412	1.00809	4.01719	NA	Uncharacterized protein
GRMZM5G875445	cluster3	0.37127	2.26441	4.07804	9.88067	15.8988	19.758	NA	Uncharacterized protein
GRMZM2G166833	cluster3	0.0440604	0.0944315	0.131468	1.28293	1.92902	3.46255	NA	Uncharacterized protein
GRMZM2G003514	cluster3	0.0361404	0	0.0848281	0.834956	1.83345	1.89682	zag5	Uncharacterized protein; Zea agamous5
GRMZM2G450717	cluster3	0	0.788384	0.0979565	0.22752	1.67217	1.78458	NA	Uncharacterized protein
AC149828.2_FG004	cluster3	0.171692	0.864228	1.31031	5.42305	7.42985	13.5711	NA	Uncharacterized protein
GRMZM2G347027	cluster3	0	0	0.0236368	0.20742	1.35876	2.31988	NA	Uncharacterized protein
GRMZM2G150731	cluster3	0.759874	0	0.100348	25.0873	160.348	171.044	NA	Uncharacterized protein
GRMZM2G021790	cluster3	0.158835	0.39227	0.398043	5.22551	10.7933	11.9172	ereb146	Putative AP2/EREBP transcription factor superfamily protein
GRMZM2G170742	cluster3	0	0.781979	0.241257	0.404924	0.600157	1.27103	NA	Putative uncharacterized protein
GRMZM2G061088	cluster3	0.0313055	0.0368779	0.0245412	0.960132	3.73821	12.3217	NA	Peroxidase 2; Uncharacterized protein
GRMZM2G130755	cluster3	0.0334619	0	0.0101243	1.27422	5.44286	5.21988	NA	Uncharacterized protein
GRMZM2G057766	cluster3	0	0	0	0.374693	0.85888	2.31652	NA	Chitinase 1
GRMZM2G089958	cluster3	0	0	0	0.562336	3.43817	3.90777	NA	Stress responsive protein
GRMZM2G170116	cluster3	0.29599	0.892822	7.18536	12.0133	21.9694	27.8664	NA	NA
GRMZM2G135513	cluster3	0	0.297507	0.337267	1.04907	2.9151	6.53498	NA	NA
GRMZM2G447791	cluster3	0	0	0	0.57833	2.12728	2.2246	NA	Uncharacterized protein
GRMZM2G150468	cluster3	0.0295748	0.30026	0.137628	1.30401	3.46454	3.29781	NA	NA
GRMZM2G043855	cluster3	0	0.443652	0.104507	0.404138	1.89081	1.19482	NA	Uncharacterized protein
GRMZM2G165805	cluster3	0	0	0.0740819	0.536357	1.10201	1.0558	lbd28	Putative LOB domain-containing family protein
GRMZM2G070242	cluster3	0.0753997	0	0.0233286	3.93562	13.016	15.3885	NA	NA
GRMZM2G115124	cluster3	0.580575	0.22919	0.356443	29.4632	124.699	150.312	NA	Root cap-specific protein
GRMZM2G469099	cluster3	0	0	0	1.1894	3.89483	3.67982	NA	NA
GRMZM2G024996	cluster3	0	0	0.0668028	0.509863	2.49078	2.48253	NA	Uncharacterized protein
GRMZM2G147774	cluster3	0.0853371	0.676389	0.339732	4.82295	11.8259	14.2541	NA	NA
GRMZM2G176943	cluster3	0	0	0	0.313371	3.10249	2.89383	NA	NA
GRMZM2G055059	cluster3	0.0400916	0.143595	0.042811	2.48421	9.56611	10.5226	NA	Uncharacterized protein
GRMZM2G454424	cluster3	0	0	0.0142589	0.469066	0.637401	1.4387	NA	Uncharacterized protein
GRMZM2G061521	cluster3	0	0	0	0.940652	7.76578	16.8669	NA	Uncharacterized protein
GRMZM2G080825	cluster3	0.0219965	0.013552	0	1.43075	4.43237	8.05533	NA	NA
GRMZM2G394979	cluster3	0	0	0	1.23809	5.87574	2.88278	NA	NA
GRMZM2G027167	cluster3	0	0	0.0763062	0.905485	6.46862	4.04784	NA	Uncharacterized protein
GRMZM2G114588	cluster3	0	0	0	0.600129	2.17411	4.14817	NA	Uncharacterized protein
GRMZM2G002568	cluster3	0	0.140772	0.0855619	0.917641	2.91852	2.66814	NA	NA
GRMZM2G348241	cluster3	0.0751071	0.0868289	0.454821	6.57966	24.6419	26.9308	NA	Uncharacterized protein
GRMZM2G178734	cluster3	0.0293299	0.110017	0.0627476	2.53051	7.73847	11.7034	NA	Uncharacterized protein
GRMZM2G048458	cluster3	0.0504822	0.0936152	0.32749	4.52816	8.66516	10.8279	NA	NA
GRMZM2G464895	cluster3	0.0115227	0	0.0993043	1.22502	3.90925	5.64114	NA	Uncharacterized protein
GRMZM2G163195	cluster3	0.0461661	0.0149388	0.0826801	4.01416	11.6097	13.1181	NA	NA
GRMZM2G061776	cluster3	0.0295993	0.0430659	0.199059	2.7677	11.6026	14.4546	NA	NA
GRMZM2G136042	cluster3	0	0	0.0141205	0.868354	0.584158	7.00378	NA	NA
GRMZM2G008316	cluster3	0	0	0.0501271	0.868064	3.50708	4.57641	NA	Uncharacterized protein
GRMZM2G427635	cluster3	0	0.0444603	0.0156952	0.756822	4.49359	5.57086	NA	NA
GRMZM2G409771	cluster3	0	0.0203146	0	0.549046	1.94999	1.95746	NA	Uncharacterized protein
GRMZM2G462555	cluster3	0.0164102	0.117101	0.187352	2.96714	7.09333	9.18065	NA	Putative uncharacterized protein
GRMZM2G401983	cluster3	0	0.0499881	0.0138461	2.49271	10.7636	11.2721	NA	Uncharacterized protein
[truncated: 5,528 more rows]
