# Supplementary material for: Transcriptome Profiling Predicts New Genes to Promote Maize Callus Formation and Transformation
Source: Front Plant Sci. 2019 Dec 20;10:1633. doi: 10.3389/fpls.2019.01633 (PMC6934073; doi:10.3389/fpls.2019.01633)
Supplement: Supplementary Table S6 — The expression level change of the induced AP2 transcription factors [file Table_6.xlsx]

## Sheet: Sheet4
Supplementary Table S6. The expression level change of the induced AP2 transcription factors .
geneID	Symbol	cluster	D0_FPKM	D1_FPKM	D2_FPKM	D4_FPKM	D6_FPKM	D8_FPKM	the time with highest expression level
GRMZM2G174784	ereb197	cluster1	2.72635	3.30281	5.01358	5.37845	6.66344	2.79326	D6
GRMZM5G862109	ts6	cluster2	5.51611	13.0332	33.671	41.7704	38.1112	38.1527	D4
GRMZM2G366434	BBM2	cluster2	18.947	21.5148	72.3992	64.9068	79.7684	92.4781	D8
GRMZM2G141638	BBM	cluster6	6.95955	5.15769	14.7377	43.2162	50.0266	43.2765	D6
GRMZM2G139082	hscf1	cluster6	15.0309	21.2527	45.802	109.514	77.9564	73.7927	D4
GRMZM2G317160	ereb26	cluster6	0.568403	0.256512	0.541933	1.8921	2.28658	1.1385	D6
GRMZM2G416701	ereb81	cluster6	33.625	33.3481	47.5246	113.295	77.033	90.9606	D4
GRMZM2G451031	ereb77	cluster8	4.4172	2.60352	0.764277	0.444285	0.501898	0.17435	D0
GRMZM2G113078	ereb117	cluster8	7.88972	2.40021	1.53648	0.394891	0.212426	0.256903	D0
GRMZM2G028151	ereb184	cluster8	8.27484	3.21222	2.24523	1.30964	0.676606	0.400893	D0
GRMZM2G146688	ereb41	cluster8	14.2862	9.13802	5.24314	1.00401	0.313282	0.128404	D0
GRMZM2G086573	ereb24	cluster8	112.885	66.3064	46.8366	34.8007	35.4267	41.4763	D0
GRMZM2G399072	ereb130	cluster8	58.5575	53.8306	27.6041	22.145	16.7233	11.5806	D0
GRMZM2G021573	ereb161	cluster8	3.83653	2.37139	1.80939	0.820746	0.758889	0.523579	D0
GRMZM2G174834	wri2	cluster5	74.8244	12.4734	1.98081	0.993839	1.16532	0.637079	D0
GRMZM2G124524	wri1	cluster5	153.398	36.9528	8.92389	5.03073	4.94149	4.07773	D0
